# Supplementary material for: The resolution of the weak-exchange limit made rigorous, simple and general in binuclear complexes
Source: Royal Society of Chemistry journal article supplement (doi:10.1039/d3cp04943d), 2024-01-01
Supplement: d3cp04943d1.pdf [file d3cp04943d1.pdf]

Electronic Supplementary Information for:  
The resolution of the weak-exchange limit made rigorous, simple and general in  
binuclear complexes

Dumitru-Claudiu Sergentu,<sup>a,b</sup> Boris Le Guennic,<sup>a</sup> and Rémi Maurice<sup>\*a</sup>

<sup>a</sup> Univ Rennes, CNRS ISCR (Institut des Sciences Chimiques de Rennes) – UMR 6226, Rennes, France.

<sup>b</sup> Universitatea Alexandru Ioan Cuza din Iași, Laboratorul RA-03 (RECENT AIR), Iași, Romania.

Contents

|                                                                                          |            |
|------------------------------------------------------------------------------------------|------------|
| <b>S1 Supporting tables</b>                                                              | <b>S2</b>  |
| <b>S2 xyz coordinates</b>                                                                | <b>S21</b> |
| S2.1 Complex 1: $[\text{Co}_2\text{Cl}_6]^{2-}$ . . . . .                                | S21        |
| S2.2 Complex 2: $[\text{Co}_2(\text{L})_2(\text{acac})_2(\text{H}_2\text{O})]$ . . . . . | S21        |

## S1 Supporting tables

Table S1 Matrix  $U$  used to translate  $\hat{H}^{\text{eff}}$  and  $\hat{H}^{\text{MS}}$  between the coupled-spin and uncoupled-spin bases.

| $U$                   | $ 3,3\rangle$ | $ 3,2\rangle$        | $ 3,1\rangle$         | $ 3,0\rangle$          | $ 3,-1\rangle$        | $ 3,-2\rangle$       | $ 3,-3\rangle$ | $ 2,2\rangle$         | $ 2,1\rangle$         | $ 2,0\rangle$  | $ 2,-1\rangle$        | $ 2,-2\rangle$        | $ 1,1\rangle$          | $ 1,0\rangle$          | $ 1,-1\rangle$         | $ 0,0\rangle$  |
|-----------------------|---------------|----------------------|-----------------------|------------------------|-----------------------|----------------------|----------------|-----------------------|-----------------------|----------------|-----------------------|-----------------------|------------------------|------------------------|------------------------|----------------|
| $\langle 3/2, 3/2 $   | 1             | 0                    | 0                     | 0                      | 0                     | 0                    | 0              | 0                     | 0                     | 0              | 0                     | 0                     | 0                      | 0                      | 0                      | 0              |
| $\langle 3/2, 1/2 $   | 0             | $\frac{\sqrt{2}}{2}$ | 0                     | 0                      | 0                     | 0                    | 0              | $\frac{\sqrt{2}}{2}$  | 0                     | 0              | 0                     | 0                     | 0                      | 0                      | 0                      | 0              |
| $\langle 1/2, 3/2 $   | 0             | $\frac{\sqrt{2}}{2}$ | 0                     | 0                      | 0                     | 0                    | 0              | $-\frac{\sqrt{2}}{2}$ | 0                     | 0              | 0                     | 0                     | 0                      | 0                      | 0                      | 0              |
| $\langle 3/2, -1/2 $  | 0             | 0                    | $\frac{\sqrt{5}}{5}$  | 0                      | 0                     | 0                    | 0              | 0                     | $\frac{\sqrt{2}}{2}$  | 0              | 0                     | 0                     | $\frac{\sqrt{30}}{10}$ | 0                      | 0                      | 0              |
| $\langle 1/2, 1/2 $   | 0             | 0                    | $\frac{\sqrt{15}}{5}$ | 0                      | 0                     | 0                    | 0              | 0                     | 0                     | 0              | 0                     | 0                     | $-\frac{\sqrt{10}}{5}$ | 0                      | 0                      | 0              |
| $\langle -1/2, 3/2 $  | 0             | 0                    | $\frac{\sqrt{5}}{5}$  | 0                      | 0                     | 0                    | 0              | 0                     | $-\frac{\sqrt{2}}{2}$ | 0              | 0                     | 0                     | $\frac{\sqrt{30}}{10}$ | 0                      | 0                      | 0              |
| $\langle 3/2, -3/2 $  | 0             | 0                    | 0                     | $\frac{\sqrt{5}}{10}$  | 0                     | 0                    | 0              | 0                     | 0                     | $\frac{1}{2}$  | 0                     | 0                     | 0                      | $\frac{3\sqrt{5}}{10}$ | 0                      | $\frac{1}{2}$  |
| $\langle 1/2, -1/2 $  | 0             | 0                    | 0                     | $\frac{3\sqrt{5}}{10}$ | 0                     | 0                    | 0              | 0                     | 0                     | $\frac{1}{2}$  | 0                     | 0                     | 0                      | $-\frac{\sqrt{5}}{10}$ | 0                      | $-\frac{1}{2}$ |
| $\langle -1/2, 1/2 $  | 0             | 0                    | 0                     | $\frac{3\sqrt{5}}{10}$ | 0                     | 0                    | 0              | 0                     | 0                     | $-\frac{1}{2}$ | 0                     | 0                     | 0                      | $-\frac{\sqrt{5}}{10}$ | 0                      | $\frac{1}{2}$  |
| $\langle -3/2, 3/2 $  | 0             | 0                    | 0                     | $\frac{\sqrt{5}}{10}$  | 0                     | 0                    | 0              | 0                     | 0                     | $-\frac{1}{2}$ | 0                     | 0                     | 0                      | $\frac{3\sqrt{5}}{10}$ | 0                      | $-\frac{1}{2}$ |
| $\langle 1/2, -3/2 $  | 0             | 0                    | 0                     | 0                      | $\frac{\sqrt{5}}{5}$  | 0                    | 0              | 0                     | 0                     | 0              | $\frac{\sqrt{2}}{2}$  | 0                     | 0                      | 0                      | $\frac{\sqrt{30}}{10}$ | 0              |
| $\langle -1/2, -1/2 $ | 0             | 0                    | 0                     | 0                      | $\frac{\sqrt{15}}{5}$ | 0                    | 0              | 0                     | 0                     | 0              | 0                     | 0                     | 0                      | 0                      | $-\frac{\sqrt{10}}{5}$ | 0              |
| $\langle -3/2, 1/2 $  | 0             | 0                    | 0                     | 0                      | $\frac{\sqrt{5}}{5}$  | 0                    | 0              | 0                     | 0                     | 0              | $-\frac{\sqrt{2}}{2}$ | 0                     | 0                      | 0                      | $\frac{\sqrt{30}}{10}$ | 0              |
| $\langle -1/2, -3/2 $ | 0             | 0                    | 0                     | 0                      | 0                     | $\frac{\sqrt{2}}{2}$ | 0              | 0                     | 0                     | 0              | 0                     | $\frac{\sqrt{2}}{2}$  | 0                      | 0                      | 0                      | 0              |
| $\langle -3/2, -1/2 $ | 0             | 0                    | 0                     | 0                      | 0                     | $\frac{\sqrt{2}}{2}$ | 0              | 0                     | 0                     | 0              | 0                     | $-\frac{\sqrt{2}}{2}$ | 0                      | 0                      | 0                      | 0              |
| $\langle -3/2, -3/2 $ | 0             | 0                    | 0                     | 0                      | 0                     | 0                    | 1              | 0                     | 0                     | 0              | 0                     | 0                     | 0                      | 0                      | 0                      | 0              |

Table S2 SOCI energies, in  $\text{cm}^{-1}$ , corresponding to the 16 low-lying spin-orbit states of complex 1, calculated with various approaches.

| SOCI state  | SO-CASSCF | SO-NEVPT2 | model//SO-NEVPT2 | SO-DDCI2 | model//SO-DDCI2 |
|-------------|-----------|-----------|------------------|----------|-----------------|
| $\psi_1$    | 0.0       | 0.0       | 0.0              | 0.0      | 0.0             |
| $\psi_2$    | 4.8       | 6.6       | 5.9              | 11.2     | 10.3            |
| $\psi_3$    | 21.8      | 24.1      | 23.4             | 30.1     | 29.5            |
| $\psi_4$    | 29.0      | 39.9      | 39.0             | 56.1     | 55.4            |
| $\psi_5$    | 56.2      | 55.9      | 54.6             | 76.7     | 74.7            |
| $\psi_6$    | 56.8      | 56.3      | 55.4             | 77.2     | 75.8            |
| $\psi_7$    | 56.9      | 56.8      | 55.6             | 77.7     | 75.8            |
| $\psi_8$    | 57.4      | 57.0      | 55.8             | 77.9     | 76.1            |
| $\psi_9$    | 57.6      | 63.7      | 63.0             | 94.2     | 92.8            |
| $\psi_{10}$ | 70.6      | 72.2      | 71.7             | 106.9    | 106.1           |
| $\psi_{11}$ | 71.4      | 78.2      | 78.0             | 108.5    | 107.6           |
| $\psi_{12}$ | 78.5      | 79.6      | 78.9             | 122.9    | 122.6           |
| $\psi_{13}$ | 92.7      | 87.1      | 86.6             | 133.8    | 133.2           |
| $\psi_{14}$ | 100.0     | 96.1      | 95.7             | 139.4    | 138.9           |
| $\psi_{15}$ | 123.2     | 123.2     | 122.5            | 170.2    | 169.3           |
| $\psi_{16}$ | 123.4     | 123.3     | 122.7            | 170.4    | 169.5           |

Table S3 Contribution of the  $|S, M_S\rangle$  components of the low-lying  $S = 0, 1, 2, 3$  states to the wavefunctions of the 16 low-energy spin-orbit states, obtained from a SO-NEVPT2 calculation on complex 1 in the arbitrary xyz frame.<sup>a</sup>

| SOCI state  | $ 3,3\rangle$ | $ 3,2\rangle$ | $ 3,1\rangle$ | $ 3,0\rangle$ | $ 3,-1\rangle$ | $ 3,-2\rangle$ | $ 3,-3\rangle$ | $ 2,2\rangle$ | $ 2,1\rangle$ | $ 2,0\rangle$ | $ 2,-1\rangle$ | $ 2,-2\rangle$ | $ 1,1\rangle$ | $ 1,0\rangle$ | $ 1,-1\rangle$ | $ 0,0\rangle$ |
|-------------|---------------|---------------|---------------|---------------|----------------|----------------|----------------|---------------|---------------|---------------|----------------|----------------|---------------|---------------|----------------|---------------|
| $\psi_1$    | 0             | 0             | 0             | 0             | 0              | 0              | 0              | 0.13          | 0             | 0             | 0              | 0.13           | 0             | 0             | 0              | 0.65          |
| $\psi_2$    | 0.03          | 0             | 0             | 0             | 0              | 0              | 0.03           | 0             | 0             | 0             | 0              | 0              | 0.42          | 0.00          | 0.42           | 0             |
| $\psi_3$    | 0             | 0.05          | 0             | 0.03          | 0              | 0.05           | 0              | 0             | 0             | 0             | 0              | 0              | 0             | 0.78          | 0              | 0             |
| $\psi_4$    | 0.13          | 0             | 0.11          | 0             | 0.11           | 0              | 0.13           | 0             | 0             | 0             | 0              | 0              | 0.21          | 0             | 0.21           | 0             |
| $\psi_5$    | 0             | 0             | 0             | 0             | 0              | 0              | 0              | 0.45          | 0.01          | 0.01          | 0.01           | 0.45           | 0             | 0             | 0              | 0             |
| $\psi_6$    | 0             | 0             | 0             | 0             | 0              | 0              | 0              | 0             | 0.46          | 0             | 0.46           | 0              | 0             | 0             | 0              | 0             |
| $\psi_7$    | 0             | 0             | 0             | 0             | 0              | 0              | 0              | 0.02          | 0.02          | 0.87          | 0.02           | 0.02           | 0             | 0             | 0              | 0             |
| $\psi_8$    | 0             | 0             | 0             | 0             | 0              | 0              | 0              | 0.01          | 0.45          | 0.014         | 0.45           | 0.01           | 0             | 0             | 0              | 0             |
| $\psi_9$    | 0             | 0.19          | 0.01          | 0.39          | 0.01           | 0.19           | 0              | 0             | 0             | 0             | 0              | 0              | 0             | 0.13          | 0              | 0             |
| $\psi_{10}$ | 0             | 0.01          | 0.27          | 0.01          | 0.27           | 0.01           | 0              | 0             | 0             | 0             | 0              | 0              | 0.18          | 0             | 0.18           | 0             |
| $\psi_{11}$ | 0.36          | 0             | 0.07          | 0.01          | 0.07           | 0              | 0.36           | 0             | 0             | 0             | 0              | 0              | 0.03          | 0             | 0.03           | 0             |
| $\psi_{12}$ | 0             | 0             | 0             | 0             | 0              | 0              | 0              | 0.32          | 0             | 0.02          | 0              | 0.32           | 0             | 0             | 0              | 0.28          |
| $\psi_{13}$ | 0             | 0.45          | 0.01          | 0             | 0.01           | 0.45           | 0              | 0             | 0             | 0             | 0              | 0              | 0             | 0             | 0              | 0             |
| $\psi_{14}$ | 0.32          | 0.01          | 0.06          | 0             | 0.06           | 0.01           | 0.32           | 0             | 0             | 0             | 0              | 0              | 0.08          | 0             | 0.08           | 0             |
| $\psi_{15}$ | 0             | 0.2           | 0.03          | 0.45          | 0.03           | 0.2            | 0              | 0             | 0             | 0             | 0              | 0              | 0             | 0.01          | 0              | 0             |
| $\psi_{16}$ | 0.06          | 0.02          | 0.36          | 0.04          | 0.36           | 0.02           | 0.06           | 0             | 0             | 0             | 0              | 0              | 0             | 0             | 0              | 0             |

<sup>a</sup>The corresponding state energies are printed in Table S2.

Table S4 Contribution of the  $|S, M_S\rangle$  components of the low-lying  $S = 0, 1, 2, 3$  states to the wavefunctions of the 16 low-lying spin-orbit states, obtained from a SO-NEVPT2 calculation on complex 2 in the molecular PAF.<sup>a</sup>

| SOCI state  | $ 3,3\rangle$ | $ 3,2\rangle$ | $ 3,1\rangle$ | $ 3,0\rangle$ | $ 3,-1\rangle$ | $ 3,-2\rangle$ | $ 3,-3\rangle$ | $ 2,2\rangle$ | $ 2,1\rangle$ | $ 2,0\rangle$ | $ 2,-1\rangle$ | $ 2,-2\rangle$ | $ 1,1\rangle$ | $ 1,0\rangle$ | $ 1,-1\rangle$ | $ 0,0\rangle$ |
|-------------|---------------|---------------|---------------|---------------|----------------|----------------|----------------|---------------|---------------|---------------|----------------|----------------|---------------|---------------|----------------|---------------|
| $\psi_1$    | 0             | 0             | 0             | 0             | 0              | 0              | 0              | 0.02          | 0             | 0.23          | 0              | 0.02           | 0             | 0             | 0              | 0.65          |
| $\psi_2$    | 0             | 0             | 0.03          | 0             | 0.03           | 0              | 0              | 0             | 0             | 0             | 0              | 0              | 0.43          | 0             | 0.43           | 0             |
| $\psi_3$    | 0             | 0             | 0.07          | 0             | 0.07           | 0              | 0              | 0             | 0             | 0             | 0              | 0              | 0.39          | 0             | 0.39           | 0             |
| $\psi_4$    | 0             | 0             | 0             | 0.5           | 0              | 0              | 0              | 0             | 0             | 0             | 0              | 0              | 0             | 0.41          | 0              | 0             |
| $\psi_5$    | 0             | 0             | 0             | 0             | 0              | 0              | 0              | 0             | 0.46          | 0             | 0.46           | 0              | 0             | 0             | 0              | 0             |
| $\psi_6$    | 0             | 0             | 0             | 0             | 0              | 0              | 0              | 0.46          | 0             | 0             | 0.46           | 0              | 0             | 0             | 0              | 0             |
| $\psi_7$    | 0             | 0             | 0             | 0             | 0              | 0              | 0              | 0.4           | 0             | 0.11          | 0              | 0.4            | 0             | 0             | 0              | 0             |
| $\psi_8$    | 0             | 0             | 0             | 0             | 0              | 0              | 0              | 0             | 0.46          | 0             | 0.46           | 0              | 0             | 0             | 0              | 0             |
| $\psi_9$    | 0.01          | 0             | 0.39          | 0             | 0.39           | 0              | 0.01           | 0             | 0             | 0             | 0              | 0              | 0.07          | 0             | 0.07           | 0             |
| $\psi_{10}$ | 0             | 0.17          | 0             | 0.23          | 0              | 0.17           | 0              | 0             | 0             | 0             | 0              | 0              | 0             | 0.36          | 0              | 0             |
| $\psi_{11}$ | 0.01          | 0             | 0.42          | 0             | 0.42           | 0              | 0.01           | 0             | 0             | 0             | 0              | 0              | 0.03          | 0             | 0.03           | 0             |
| $\psi_{12}$ | 0             | 0             | 0             | 0             | 0              | 0              | 0              | 0.04          | 0             | 0.57          | 0              | 0.04           | 0             | 0             | 0              | 0.28          |
| $\psi_{13}$ | 0             | 0.46          | 0             | 0             | 0              | 0.46           | 0              | 0             | 0             | 0             | 0              | 0              | 0             | 0             | 0              | 0             |
| $\psi_{14}$ | 0             | 0.29          | 0             | 0.19          | 0              | 0.29           | 0              | 0             | 0             | 0             | 0              | 0              | 0             | 0.16          | 0              | 0             |
| $\psi_{15}$ | 0.46          | 0             | 0             | 0             | 0              | 0              | 0.46           | 0             | 0             | 0             | 0              | 0              | 0             | 0             | 0              | 0             |
| $\psi_{16}$ | 0.45          | 0             | 0.01          | 0             | 0.01           | 0              | 0.45           | 0             | 0             | 0             | 0              | 0              | 0             | 0             | 0              | 0             |

<sup>a</sup>The corresponding state energies are printed in Table S2.



Table S6 Table S5 continued.

| $HMS$   | (1, 1)                                                                                                    | (1, 0)                                                                                                      | (1, -1)                                                                                                   | (0, 0)                                                             |
|---------|-----------------------------------------------------------------------------------------------------------|-------------------------------------------------------------------------------------------------------------|-----------------------------------------------------------------------------------------------------------|--------------------------------------------------------------------|
| (3, 3)  | $3\sqrt{10} \frac{(D_{XX}^{a+b} - 2D_{YY}^{a+b} - D_{ZZ}^{a+b})}{20}$                                     | 0                                                                                                           | 0                                                                                                         | 0                                                                  |
| (3, 2)  | $\frac{\sqrt{15}(-D_{XX}^{a+b} + D_{ZZ}^{a+b})}{5}$                                                       | $\frac{\sqrt{30}(D_{XX}^{a+b} - 2D_{YY}^{a+b} - D_{ZZ}^{a+b})}{2\sqrt{5}(-D_{XX}^{a+b} + D_{ZZ}^{a+b})}$    | 0                                                                                                         | 0                                                                  |
| (3, 1)  | $\sqrt{6} \frac{(-D_{XX}^{a+b} - 2D_{YY}^{a+b} + 2D_{ZZ}^{a+b})}{3\sqrt{2}(D_{XX}^{a+b} + D_{ZZ}^{a+b})}$ | $\frac{3D_{XX}^{a+b} - 3D_{YY}^{a+b} + 3D_{ZZ}^{a+b}}{-\frac{10}{3}\sqrt{3}(-D_{XX}^{a+b} + D_{ZZ}^{a+b})}$ | $\frac{\sqrt{6}(D_{XX}^{a+b} - 2D_{YY}^{a+b} - D_{ZZ}^{a+b})}{3\sqrt{2}(-D_{XX}^{a+b} + D_{ZZ}^{a+b})}$   | 0                                                                  |
| (3, 0)  | $\frac{3\sqrt{2}(D_{XX}^{a+b} + D_{ZZ}^{a+b})}{10}$                                                       | $-\frac{10}{2\sqrt{3}} \frac{(D_{XX}^{a+b} + D_{ZZ}^{a+b})}{5}$                                             | $\frac{\sqrt{6}(-D_{XX}^{a+b} - 2D_{YY}^{a+b} + 2D_{ZZ}^{a+b})}{2\sqrt{3}(D_{XX}^{a+b} + D_{ZZ}^{a+b})}$  | 0                                                                  |
| (3, -1) | $\frac{\sqrt{6}(D_{XX}^{a+b} + 2D_{YY}^{a+b} - D_{ZZ}^{a+b})}{20}$                                        | $\frac{\sqrt{30}(D_{XX}^{a+b} + 2D_{YY}^{a+b} - D_{ZZ}^{a+b})}{5}$                                          | $\frac{\sqrt{6}(-D_{XX}^{a+b} - 2D_{YY}^{a+b} + 2D_{ZZ}^{a+b})}{2\sqrt{3}(D_{XX}^{a+b} + D_{ZZ}^{a+b})}$  | 0                                                                  |
| (3, -2) | 0                                                                                                         | $\frac{\sqrt{30}(D_{XX}^{a+b} + 2D_{YY}^{a+b} - D_{ZZ}^{a+b})}{20}$                                         | $\frac{\sqrt{15}(D_{XX}^{a+b} + D_{ZZ}^{a+b})}{5}$                                                        | 0                                                                  |
| (3, -3) | 0                                                                                                         | $\frac{\sqrt{30}(-D_{XX}^{a+b} + 2D_{YY}^{a+b} + D_{ZZ}^{a+b})}{10}$                                        | $\frac{3\sqrt{10}(D_{XX}^{a+b} + D_{ZZ}^{a+b})}{20}$                                                      | $\frac{\sqrt{6}(D_{XX}^{a+b} - 2D_{YY}^{a+b} - D_{ZZ}^{a+b})}{2}$  |
| (2, 2)  | $\frac{\sqrt{15}(-D_{XX}^{a+b} + D_{ZZ}^{a+b})}{5}$                                                       | $\frac{\sqrt{30}(-D_{XX}^{a+b} + D_{ZZ}^{a+b})}{10}$                                                        | 0                                                                                                         | $\frac{\sqrt{6}(-D_{XX}^{a+b} - 2D_{YY}^{a+b} - D_{ZZ}^{a+b})}{2}$ |
| (2, 1)  | $\frac{\sqrt{15}(-D_{XX}^{a+b} - D_{YY}^{a+b} + 2D_{ZZ}^{a+b})}{3\sqrt{10}(D_{XX}^{a+b} + D_{ZZ}^{a+b})}$ | 0                                                                                                           | $\frac{\sqrt{15}(-D_{XX}^{a+b} + 2D_{YY}^{a+b} + D_{ZZ}^{a+b})}{3\sqrt{10}(D_{XX}^{a+b} + D_{ZZ}^{a+b})}$ | $-\frac{D_{XX}^{a+b}}{2} - \frac{D_{YY}^{a+b}}{2} + D_{ZZ}^{a+b}$  |
| (2, 0)  | $\frac{3\sqrt{10}(D_{XX}^{a+b} + D_{ZZ}^{a+b})}{10}$                                                      | $\frac{\sqrt{30}(D_{XX}^{a+b} + 2D_{YY}^{a+b} - D_{ZZ}^{a+b})}{10}$                                         | $\frac{\sqrt{15}(D_{XX}^{a+b} + D_{ZZ}^{a+b})}{10}$                                                       | $\frac{\sqrt{6}(D_{XX}^{a+b} + D_{ZZ}^{a+b})}{2}$                  |
| (2, -1) | $\frac{\sqrt{15}(D_{XX}^{a+b} + 2D_{YY}^{a+b} - D_{ZZ}^{a+b})}{10}$                                       | 0                                                                                                           | $\frac{\sqrt{15}(D_{XX}^{a+b} + D_{ZZ}^{a+b})}{10}$                                                       | $\frac{\sqrt{6}(D_{XX}^{a+b} + 2D_{YY}^{a+b} - D_{ZZ}^{a+b})}{2}$  |
| (2, -2) | 0                                                                                                         | $\frac{\sqrt{30}(D_{XX}^{a+b} + 2D_{YY}^{a+b} - D_{ZZ}^{a+b})}{10}$                                         | $\frac{\sqrt{15}(-D_{XX}^{a+b} - D_{YY}^{a+b})}{5}$                                                       | 4                                                                  |
| (1, 1)  | $-\frac{11}{4} + \frac{20D_{XX}^{a+b} + 20D_{YY}^{a+b} + 17D_{ZZ}^{a+b}}{20}$                             | $\frac{3\sqrt{2}(-D_{XX}^{a+b} + D_{ZZ}^{a+b})}{5}$                                                         | $-\frac{3D_{XX}^{a+b}}{5} + \frac{6D_{YY}^{a+b}}{5} + \frac{3D_{ZZ}^{a+b}}{5}$                            | 0                                                                  |
| (1, 0)  | $\frac{3\sqrt{2}(-D_{XX}^{a+b} - D_{YY}^{a+b})}{5}$                                                       | $-\frac{11}{4} + \frac{17D_{XX}^{a+b} + 17D_{YY}^{a+b} + 41D_{ZZ}^{a+b}}{20}$                               | $\frac{3\sqrt{2}(D_{XX}^{a+b} - D_{ZZ}^{a+b})}{5}$                                                        | 0                                                                  |
| (1, -1) | $-\frac{3D_{XX}^{a+b}}{5} - \frac{6D_{YY}^{a+b}}{5} + \frac{3D_{ZZ}^{a+b}}{5}$                            | $-\frac{11}{4} + \frac{17D_{XX}^{a+b} + 17D_{YY}^{a+b} + 41D_{ZZ}^{a+b}}{20}$                               | $-\frac{11}{4} + \frac{20D_{XX}^{a+b} + 20D_{YY}^{a+b} + 17D_{ZZ}^{a+b}}{20}$                             | 0                                                                  |
| (0, 0)  | 0                                                                                                         | 0                                                                                                           | $-\frac{15}{2} + \frac{5D_{XX}^{a+b}}{2} + \frac{5D_{YY}^{a+b}}{2} + \frac{5D_{ZZ}^{a+b}}{2}$             | 0                                                                  |

Table S7 Matrix elements of  $\hat{H}^{\text{MS}}$  for dicobalt(II) complexes in an arbitrary axis frame expressed in the  $|S, M_S\rangle$  coupled spin-basis defined by  $S = 0, 1, 2, 3$  spin functions. This table provides the symmetric anisotropy exchange part,  $\hat{S}_a \bar{D}_{ab} \hat{S}_b$ .

| $H^{\text{MS}}$ | [3,3]                                                                                           | [3,2]                                                                           | [3,1]                                                                           | [3,0]                                                                                           | [3,-1]                                                                                          | [3,-2]                                                                                          | [3,-3]                                                                          |
|-----------------|-------------------------------------------------------------------------------------------------|---------------------------------------------------------------------------------|---------------------------------------------------------------------------------|-------------------------------------------------------------------------------------------------|-------------------------------------------------------------------------------------------------|-------------------------------------------------------------------------------------------------|---------------------------------------------------------------------------------|
| (3,3)           | $\frac{9D_{XX}^{\text{ab}}}{4}$                                                                 | $\frac{3\sqrt{3}(D_{XX}^{\text{ab}}-D_{YY}^{\text{ab}})}{4}$                    | $\frac{3D_{XX}^{\text{ab}}-3D_{YY}^{\text{ab}}}{4}$                             | 0                                                                                               | $\frac{3D_{XX}^{\text{ab}}-3D_{YY}^{\text{ab}}}{4}$                                             | 0                                                                                               | 0                                                                               |
| (3,2)           | $\frac{3\sqrt{3}(D_{XX}^{\text{ab}}+D_{YY}^{\text{ab}})}{4}$                                    | $\frac{3D_{XX}^{\text{ab}}}{4}$                                                 | $\frac{3D_{XX}^{\text{ab}}-3D_{YY}^{\text{ab}}}{4}$                             | $\frac{3D_{XX}^{\text{ab}}-3D_{YY}^{\text{ab}}}{2}$                                             | $\frac{3D_{XX}^{\text{ab}}-3D_{YY}^{\text{ab}}}{4}$                                             | 0                                                                                               | 0                                                                               |
| (3,1)           | $\frac{3\sqrt{3}(D_{XX}^{\text{ab}}+D_{YY}^{\text{ab}})}{4}$                                    | $\frac{3D_{XX}^{\text{ab}}}{4}$                                                 | $\frac{3D_{XX}^{\text{ab}}-3D_{YY}^{\text{ab}}}{4}$                             | 0                                                                                               | $\frac{\sqrt{3}(D_{XX}^{\text{ab}}-D_{YY}^{\text{ab}})}{4}$                                     | $\frac{3D_{XX}^{\text{ab}}-3D_{YY}^{\text{ab}}}{2}$                                             | 0                                                                               |
| (3,0)           | 0                                                                                               | $\frac{3D_{XX}^{\text{ab}}+3D_{YY}^{\text{ab}}}{4}$                             | 0                                                                               | $\frac{3D_{XX}^{\text{ab}}}{4}$                                                                 | $\frac{\sqrt{3}(D_{XX}^{\text{ab}}+D_{YY}^{\text{ab}})}{2}$                                     | 0                                                                                               | $\frac{3\sqrt{3}(D_{XX}^{\text{ab}}-D_{YY}^{\text{ab}})}{4}$                    |
| (3,-1)          | $\frac{3D_{XX}^{\text{ab}}}{4} + \frac{3D_{YY}^{\text{ab}}}{2} - \frac{3D_{ZZ}^{\text{ab}}}{4}$ | $\frac{3\sqrt{3}(D_{XX}^{\text{ab}}+D_{YY}^{\text{ab}})}{4}$                    | $\frac{3D_{XX}^{\text{ab}}}{4}$                                                 | $\frac{\sqrt{3}(D_{XX}^{\text{ab}}+D_{YY}^{\text{ab}})}{2}$                                     | $\frac{D_{XX}^{\text{ab}}}{2}$                                                                  | $\frac{\sqrt{3}(D_{XX}^{\text{ab}}+D_{YY}^{\text{ab}})}{2}$                                     | 0                                                                               |
| (3,-2)          | 0                                                                                               | 0                                                                               | 0                                                                               | 0                                                                                               | $\frac{3D_{XX}^{\text{ab}}}{4}$                                                                 | $-\frac{3D_{YY}^{\text{ab}}}{4}$                                                                | 0                                                                               |
| (3,-3)          | 0                                                                                               | 0                                                                               | 0                                                                               | $\frac{3\sqrt{3}(D_{XX}^{\text{ab}}+D_{YY}^{\text{ab}})}{4}$                                    | 0                                                                                               | 0                                                                                               | $-\frac{9D_{XX}^{\text{ab}}}{4} + \frac{3D_{YY}^{\text{ab}}}{4}$                |
| (2,2)           | 0                                                                                               | $\frac{\sqrt{3}(D_{XX}^{\text{ab}}+2D_{YY}^{\text{ab}}-D_{ZZ}^{\text{ab}})}{2}$ | 0                                                                               | $-\frac{3\sqrt{3}(D_{XX}^{\text{ab}}+D_{YY}^{\text{ab}})}{4}$                                   | $\frac{D_{XX}^{\text{ab}}}{2} + \frac{D_{YY}^{\text{ab}}}{2}$                                   | 0                                                                                               | $\frac{3D_{XX}^{\text{ab}}}{4} + \frac{3D_{YY}^{\text{ab}}}{4}$                 |
| (2,1)           | 0                                                                                               | 0                                                                               | $\frac{\sqrt{3}(D_{XX}^{\text{ab}}+2D_{YY}^{\text{ab}}-D_{ZZ}^{\text{ab}})}{2}$ | 0                                                                                               | $\frac{D_{XX}^{\text{ab}}}{2} + \frac{D_{YY}^{\text{ab}}}{2}$                                   | $-\frac{3\sqrt{3}(D_{XX}^{\text{ab}}+D_{YY}^{\text{ab}})}{4}$                                   | 0                                                                               |
| (2,0)           | 0                                                                                               | 0                                                                               | 0                                                                               | 0                                                                                               | 0                                                                                               | $\frac{3\sqrt{3}(D_{XX}^{\text{ab}}+D_{YY}^{\text{ab}})}{4}$                                    | $-\frac{3\sqrt{3}(D_{XX}^{\text{ab}}+D_{YY}^{\text{ab}})}{4}$                   |
| (2,-1)          | 0                                                                                               | 0                                                                               | 0                                                                               | $\frac{3D_{XX}^{\text{ab}}}{4} + \frac{3D_{YY}^{\text{ab}}}{2} - \frac{3D_{ZZ}^{\text{ab}}}{4}$ | $D_{XX}^{\text{ab}} + 2D_{YY}^{\text{ab}} - D_{ZZ}^{\text{ab}}$                                 | 0                                                                                               | 0                                                                               |
| (2,-2)          | 0                                                                                               | 0                                                                               | 0                                                                               | 0                                                                                               | 0                                                                                               | 0                                                                                               | 0                                                                               |
| (1,1)           | 0                                                                                               | 0                                                                               | 0                                                                               | 0                                                                                               | 0                                                                                               | $\frac{3D_{XX}^{\text{ab}}}{4} + \frac{3D_{YY}^{\text{ab}}}{2} - \frac{3D_{ZZ}^{\text{ab}}}{4}$ | 0                                                                               |
| (1,0)           | 0                                                                                               | 0                                                                               | 0                                                                               | 0                                                                                               | 0                                                                                               | 0                                                                                               | 0                                                                               |
| (1,-1)          | 0                                                                                               | 0                                                                               | 0                                                                               | 0                                                                                               | 0                                                                                               | 0                                                                                               | 0                                                                               |
| (0,0)           | 0                                                                                               | 0                                                                               | 0                                                                               | 0                                                                                               | 0                                                                                               | 0                                                                                               | 0                                                                               |
| (3,3)           | $\frac{\sqrt{3}(D_{XX}^{\text{ab}}-2D_{YY}^{\text{ab}}-D_{ZZ}^{\text{ab}})}{2}$                 | 0                                                                               | 0                                                                               | 0                                                                                               | 0                                                                                               | 0                                                                                               | 0                                                                               |
| (3,2)           | 0                                                                                               | $\frac{\sqrt{3}(D_{XX}^{\text{ab}}-2D_{YY}^{\text{ab}}-D_{ZZ}^{\text{ab}})}{2}$ | 0                                                                               | 0                                                                                               | 0                                                                                               | 0                                                                                               | 0                                                                               |
| (3,1)           | 0                                                                                               | 0                                                                               | 0                                                                               | 0                                                                                               | 0                                                                                               | 0                                                                                               | 0                                                                               |
| (3,0)           | $-\frac{\sqrt{3}(D_{XX}^{\text{ab}}-D_{YY}^{\text{ab}})}{4}$                                    | $\frac{D_{XX}^{\text{ab}}-D_{YY}^{\text{ab}}}{2}$                               | 0                                                                               | $\frac{3D_{XX}^{\text{ab}}}{4}$                                                                 | 0                                                                                               | 0                                                                                               | 0                                                                               |
| (3,-1)          | $\frac{D_{XX}^{\text{ab}}-D_{YY}^{\text{ab}}}{2}$                                               | $\frac{3\sqrt{3}(D_{XX}^{\text{ab}}-D_{YY}^{\text{ab}})}{4}$                    | 0                                                                               | 0                                                                                               | 0                                                                                               | 0                                                                                               | 0                                                                               |
| (3,-2)          | 0                                                                                               | 0                                                                               | $\frac{3\sqrt{3}(D_{XX}^{\text{ab}}-D_{YY}^{\text{ab}})}{4}$                    | 0                                                                                               | $D_{XX}^{\text{ab}} - 2D_{YY}^{\text{ab}} - D_{ZZ}^{\text{ab}}$                                 | 0                                                                                               | 0                                                                               |
| (3,-3)          | $\frac{3D_{XX}^{\text{ab}}}{4} + \frac{3D_{YY}^{\text{ab}}}{4}$                                 | 0                                                                               | 0                                                                               | $-\frac{3\sqrt{3}(D_{XX}^{\text{ab}}-D_{YY}^{\text{ab}})}{4}$                                   | 0                                                                                               | 0                                                                                               | 0                                                                               |
| (2,2)           | $-\frac{D_{XX}^{\text{ab}}-D_{YY}^{\text{ab}}}{4}$                                              | $\frac{D_{XX}^{\text{ab}}-D_{YY}^{\text{ab}}}{4}$                               | 0                                                                               | $\frac{\sqrt{3}(D_{XX}^{\text{ab}}-D_{YY}^{\text{ab}})}{4}$                                     | $-\frac{D_{XX}^{\text{ab}}}{2} + \frac{D_{YY}^{\text{ab}}}{2}$                                  | $\frac{\sqrt{3}(D_{XX}^{\text{ab}}-D_{YY}^{\text{ab}})}{2}$                                     | 0                                                                               |
| (2,1)           | $D_{XX}^{\text{ab}} - D_{YY}^{\text{ab}}$                                                       | $\frac{3D_{XX}^{\text{ab}}}{4} - \frac{3D_{YY}^{\text{ab}}}{4}$                 | 0                                                                               | 0                                                                                               | $\frac{\sqrt{3}(D_{XX}^{\text{ab}}+D_{YY}^{\text{ab}})}{2}$                                     | $-\frac{3D_{XX}^{\text{ab}}}{4}$                                                                | $\frac{\sqrt{3}(D_{XX}^{\text{ab}}-2D_{YY}^{\text{ab}}-D_{ZZ}^{\text{ab}})}{2}$ |
| (2,0)           | 0                                                                                               | $-\frac{9D_{XX}^{\text{ab}}}{4}$                                                | 0                                                                               | 0                                                                                               | 0                                                                                               | 0                                                                                               | 0                                                                               |
| (2,-1)          | $\frac{\sqrt{3}(D_{XX}^{\text{ab}}+D_{YY}^{\text{ab}})}{4}$                                     | 0                                                                               | $-\frac{3D_{XX}^{\text{ab}}}{4}$                                                | $\frac{\sqrt{3}(D_{XX}^{\text{ab}}+D_{YY}^{\text{ab}})}{2}$                                     | $\frac{D_{XX}^{\text{ab}}}{4}$                                                                  | $-\frac{3D_{YY}^{\text{ab}}}{4}$                                                                | 0                                                                               |
| (2,-2)          | $-\frac{D_{XX}^{\text{ab}}-D_{YY}^{\text{ab}}}{2}$                                              | $\frac{D_{XX}^{\text{ab}}-D_{YY}^{\text{ab}}}{4}$                               | 0                                                                               | $\frac{\sqrt{3}(D_{XX}^{\text{ab}}+D_{YY}^{\text{ab}})}{2}$                                     | $\frac{\sqrt{3}(D_{XX}^{\text{ab}}+D_{YY}^{\text{ab}})}{2}$                                     | 0                                                                                               | $\frac{\sqrt{3}(D_{XX}^{\text{ab}}-D_{YY}^{\text{ab}})}{4}$                     |
| (1,1)           | 0                                                                                               | $\frac{3\sqrt{3}(D_{XX}^{\text{ab}}+D_{YY}^{\text{ab}})}{4}$                    | $-\frac{3\sqrt{3}(D_{XX}^{\text{ab}}+D_{YY}^{\text{ab}})}{4}$                   | 0                                                                                               | $-\frac{3D_{XX}^{\text{ab}}}{2} - \frac{3D_{YY}^{\text{ab}}}{2}$                                | 0                                                                                               | 0                                                                               |
| (1,0)           | $\frac{\sqrt{3}(D_{XX}^{\text{ab}}+2D_{YY}^{\text{ab}}-D_{ZZ}^{\text{ab}})}{2}$                 | 0                                                                               | 0                                                                               | 0                                                                                               | 0                                                                                               | 0                                                                                               | 0                                                                               |
| (1,-1)          | 0                                                                                               | 0                                                                               | 0                                                                               | 0                                                                                               | 0                                                                                               | 0                                                                                               | 0                                                                               |
| (0,0)           | 0                                                                                               | 0                                                                               | 0                                                                               | 0                                                                                               | $\frac{3D_{XX}^{\text{ab}}}{4} + \frac{3D_{YY}^{\text{ab}}}{2} - \frac{3D_{ZZ}^{\text{ab}}}{4}$ | 0                                                                                               | $\frac{9D_{XX}^{\text{ab}}}{4}$                                                 |

Table S8 Complex 1: Matrix elements, in  $\text{cm}^{-1}$ , of  $\hat{H}^{\text{eff}}$  expressed in the  $|S, M_S\rangle$  coupled-spin basis, obtained from a SO-NEVPT2 calculation on complex 1 in the molecular PAF.

| $\hat{H}^{\text{MS}}$ | $ 3,3\rangle$ | $ 3,2\rangle$ | $ 3,1\rangle$ | $ 3,0\rangle$ | $ 3,-1\rangle$ | $ 3,-2\rangle$ | $ 3,-3\rangle$ | $ 2,2\rangle$ | $ 2,1\rangle$ | $ 2,0\rangle$ | $ 2,-1\rangle$ | $ 2,-2\rangle$ | $ 1,1\rangle$ | $ 1,0\rangle$ | $ 1,-1\rangle$ | $ 0,0\rangle$ |
|-----------------------|---------------|---------------|---------------|---------------|----------------|----------------|----------------|---------------|---------------|---------------|----------------|----------------|---------------|---------------|----------------|---------------|
| $\langle 3,3 $        | 58.2          | 0             | 5.1           | 0             | 0              | 0              | 0              | 0             | 0             | 0             | 0              | 0              | -7.8+0.6i     | 0             | 0              | 0             |
| $\langle 3,2 $        | 0             | 23.3          | 0             | 7.2           | 0              | 0              | 0              | 0             | 0             | 0             | 0              | 0              | 0             | -4.5+0.3i     | 0              | 0             |
| $\langle 3,1 $        | 5.1           | 0             | 2.5           | 0             | 7.9            | 0              | 0              | 0             | 0             | 0             | 0              | 0              | -16.7         | 0             | -2.0+0.1i      | 0             |
| $\langle 3,0 $        | 0             | 7.2           | 0             | -4.5          | 0              | 7.2            | 0              | 0             | 0             | 0             | 0              | 0              | 0             | -20.4         | 0              | 0             |
| $\langle 3,-1 $       | 0             | 0             | 7.9           | 0             | 2.5            | 0              | 5.1            | 0             | 0             | 0             | 0              | 0              | -2.0-0.1i     | 0             | -16.7          | 0             |
| $\langle 3,-2 $       | 0             | 0             | 0             | 7.2           | 0              | 23.3           | 0              | 0             | 0             | 0             | 0              | 0              | 0             | -4.5-0.3i     | 0              | 0             |
| $\langle 3,-3 $       | 0             | 0             | 0             | 0             | 5.1            | 0              | 58.2           | 0             | 0             | 0             | 0              | 0              | 0             | 0             | -7.8-0.6i      | 0             |
| $\langle 2,2 $        | 0             | 0             | 0             | 0             | 0              | 0              | 0              | -7.4          | 0.1i          | -0.4+0.2i     | 0              | 0              | 0             | 0             | 0              | -9.6+0.5i     |
| $\langle 2,1 $        | 0             | 0             | 0             | 0             | 0              | 0              | 0              | -0.1i         | -7.3          | 0             | -0.5+0.3i      | 0              | 0             | 0             | 0              | -0.1+0.1i     |
| $\langle 2,0 $        | 0             | 0             | 0             | 0             | 0              | 0              | 0              | -0.4-0.2i     | 0             | -7.3          | 0              | -0.4+0.2i      | 0             | 0             | 0              | -33.7         |
| $\langle 2,-1 $       | 0             | 0             | 0             | 0             | 0              | 0              | 0              | 0             | -0.5-0.3i     | 0             | -7.3           | -0.1i          | 0             | 0             | 0              | 0.1+0.1i      |
| $\langle 2,-2 $       | 0             | 0             | 0             | 0             | 0              | 0              | 0              | 0             | 0             | -0.4-0.2i     | 0.1i           | -7.4           | 0             | 0             | 0              | -9.6-0.5i     |
| $\langle 1,1 $        | -7.8-0.6i     | 0             | -16.7         | 0             | -2.0+0.1i      | 0              | 0              | 0             | 0             | 0             | 0              | 0              | -42.4         | 0.1           | -9.3+0.4i      | 0             |
| $\langle 1,0 $        | 0             | -4.5-0.3i     | 0             | -20.4         | 0              | -4.5+0.3i      | 0              | 0             | 0             | 0             | 0              | 0              | 0             | -1.8          | -0.1           | 0             |
| $\langle 1,-1 $       | 0             | 0             | -2.0-0.1i     | 0             | -16.7          | 0              | -7.8+0.6i      | 0             | 0             | 0             | 0              | 0              | -9.3-0.4i     | -0.1          | -42.4          | 0             |
| $\langle 0,0 $        | 0             | 0             | 0             | 0             | 0              | 0              | 0              | -9.6-0.5i     | -0.1-0.1i     | -33.7         | 0.1-0.1i       | -9.6+0.5i      | 0             | 0             | 0              | -40.2         |

Table S9 Complex 1: Matrix elements, in  $\text{cm}^{-1}$ , of  $\hat{H}^{\text{eff}}$  expressed in the uncoupled-spin basis,  $|M_{Sx}, M_{Sy}\rangle$ .

| $\hat{H}^{\text{MS}}$                 | $ \frac{3}{2}, \frac{3}{2}\rangle$ | $ \frac{3}{2}, \frac{1}{2}\rangle$ | $ \frac{3}{2}, -\frac{1}{2}\rangle$ | $ \frac{3}{2}, -\frac{3}{2}\rangle$ | $ \frac{1}{2}, \frac{3}{2}\rangle$ | $ \frac{1}{2}, \frac{1}{2}\rangle$ | $ \frac{1}{2}, -\frac{1}{2}\rangle$ | $ \frac{1}{2}, -\frac{3}{2}\rangle$ | $ \frac{3}{2}, \frac{3}{2}\rangle$ | $ \frac{1}{2}, -\frac{3}{2}\rangle$ | $ \frac{1}{2}, -\frac{1}{2}\rangle$ | $ \frac{3}{2}, \frac{1}{2}\rangle$ | $ \frac{1}{2}, -\frac{3}{2}\rangle$ | $ \frac{3}{2}, -\frac{1}{2}\rangle$ | $ \frac{3}{2}, -\frac{3}{2}\rangle$ | $ \frac{3}{2}, -\frac{3}{2}\rangle$ |
|---------------------------------------|------------------------------------|------------------------------------|-------------------------------------|-------------------------------------|------------------------------------|------------------------------------|-------------------------------------|-------------------------------------|------------------------------------|-------------------------------------|-------------------------------------|------------------------------------|-------------------------------------|-------------------------------------|-------------------------------------|-------------------------------------|
| $\langle \frac{3}{2}, \frac{3}{2} $   | 58.2                               | 0                                  | -2.0+0.3i                           | 8.8-0.3i                            | -2.0+0.3i                          | 0                                  | 0                                   | 0                                   | 0                                  | 0                                   | 0                                   | 0                                  | 0                                   | 0                                   | 0                                   | 0                                   |
| $\langle \frac{3}{2}, \frac{1}{2} $   | 0                                  | 8.0                                | 0                                   | 0                                   | 0                                  | -4.5+0.4i                          | 7.3-0.1i                            | 0.9+0.1i                            | 2.6-0.1i                           | 0                                   | 0                                   | 0                                  | 0                                   | 0                                   | 0                                   | 0                                   |
| $\langle \frac{3}{2}, \frac{3}{2} $   | 0                                  | 15.4                               | 0                                   | 0                                   | 0                                  | 2.6-0.1i                           | 0.9+0.1i                            | 7.3-0.1i                            | -4.5+0.4i                          | 0                                   | 0                                   | 0                                  | 0                                   | 0                                   | 0                                   | 0                                   |
| $\langle \frac{3}{2}, -\frac{1}{2} $  | -2.0-0.3i                          | 0                                  | -24.0                               | 13.2                                | -16.7                              | 0                                  | 0                                   | 0                                   | -0.1i                              | -2.5+0.3i                           | 5.7-0.1i                            | -1.9+0.1i                          | 0                                   | 0                                   | 0                                   | 0                                   |
| $\langle \frac{1}{2}, \frac{3}{2} $   | 8.8+0.3i                           | 0                                  | 13.2                                | 0.9                                 | 13.2                               | 0                                  | 0                                   | 0                                   | 0                                  | 5.7-0.1i                            | 3.0+0.1i                            | 5.7-0.1i                           | 0                                   | 0                                   | 0                                   | 0                                   |
| $\langle -\frac{1}{2}, \frac{3}{2} $  | -2.0-0.3i                          | 0                                  | -16.7                               | 13.2                                | -24.0                              | -0.1i                              | 0                                   | 0                                   | 0                                  | -1.9+0.1i                           | 5.7-0.1i                            | -2.5+0.3i                          | 0                                   | 0                                   | 0                                   | 0                                   |
| $\langle \frac{3}{2}, -\frac{3}{2} $  | 0                                  | -4.5-0.4i                          | 2.6+0.1i                            | 0                                   | 0                                  | 0                                  | 0                                   | 0                                   | 0.1i                               | -35.9                               | -0.4                                | -16.8                              | 21.6                                | 0                                   | 0.1i                                | -4.5+0.4i                           |
| $\langle \frac{1}{2}, -\frac{1}{2} $  | 0                                  | 7.3+0.1i                           | 0.9-0.1i                            | 0                                   | 0                                  | 0                                  | 0                                   | 0                                   | -0.4                               | -16.8                               | 0                                   | 0                                  | 0                                   | 0                                   | 7.3-0.1i                            | 0.9+0.1i                            |
| $\langle -\frac{1}{2}, \frac{1}{2} $  | 0                                  | 0.9-0.1i                           | 7.3+0.1i                            | 0                                   | 0                                  | 0                                  | 0                                   | 0                                   | -16.8                              | -1.0                                | 9.0                                 | -0.4                               | 0                                   | 0                                   | 0.9+0.1i                            | 7.3-0.1i                            |
| $\langle -\frac{3}{2}, \frac{3}{2} $  | 0                                  | 2.6+0.1i                           | -4.5-0.4i                           | 0.1i                                | 0                                  | 0                                  | 0                                   | 0                                   | 21.6                               | -16.8                               | -0.4                                | -35.9                              | 0.1i                                | 0                                   | 2.6-0.1i                            | -4.5+0.4i                           |
| $\langle \frac{1}{2}, -\frac{3}{2} $  | 0                                  | 0                                  | -2.5-0.3i                           | 5.7+0.1i                            | -1.9-0.1i                          | 0                                  | 0                                   | 0                                   | 0                                  | 0                                   | 0                                   | 0                                  | -16.7                               | 0                                   | 0                                   | -2.0+0.3i                           |
| $\langle -\frac{1}{2}, -\frac{1}{2} $ | 0                                  | 0                                  | 5.7+0.1i                            | 3.0-0.1i                            | 5.7+0.1i                           | 0                                  | 0                                   | 0                                   | 0                                  | 0                                   | 0                                   | 0                                  | 13.2                                | 0                                   | 0                                   | 8.8-0.3i                            |
| $\langle -\frac{3}{2}, \frac{1}{2} $  | 0                                  | 0                                  | -1.9-0.1i                           | 5.7+0.1i                            | -2.5-0.3i                          | -0.1i                              | 0                                   | 0                                   | 0                                  | -16.7                               | 13.2                                | -24.0                              | 0                                   | 0                                   | 0                                   | -2.0+0.3i                           |
| $\langle -\frac{1}{2}, -\frac{3}{2} $ | 0                                  | 0                                  | 0                                   | 0                                   | 0                                  | 0                                  | 0                                   | 0                                   | -4.5-0.4i                          | 7.3+0.1i                            | 0.9-0.1i                            | 2.6+0.1i                           | 0                                   | 0                                   | 8.0                                 | 15.4                                |
| $\langle -\frac{3}{2}, -\frac{1}{2} $ | 0                                  | 0                                  | 0                                   | 0                                   | 0                                  | 0                                  | 0                                   | 0                                   | 2.6+0.1i                           | 0.9-0.1i                            | 7.3+0.1i                            | -4.5-0.4i                          | 0                                   | 0                                   | 15.4                                | 8.0                                 |
| $\langle -\frac{3}{2}, -\frac{3}{2} $ | 0                                  | 0                                  | 0                                   | 0                                   | 0                                  | 0                                  | 0                                   | 0                                   | 0                                  | -2.0-0.3i                           | 8.8+0.3i                            | -2.0-0.3i                          | 0                                   | 0                                   | 0                                   | 58.2                                |





Table S12 Complex 1: Revised matrix elements, in  $\text{cm}^{-1}$ , of  $\hat{H}^{\text{eff}}$  expressed in the  $|S, M_S\rangle$  coupled-spin basis, obtained from a SO-NEVPT2 calculation on complex 1 in the molecular PAF. It was generated from the original  $\hat{H}^{\text{eff}}$  matrix of Table S8 by multiplying by a factor of  $-1$  the elements of the  $\langle 0,0 | \hat{H}^{\text{eff}} | 2, M_S \rangle$  and  $\langle 1, M_S | \hat{H}^{\text{eff}} | 3, M_S \rangle$  blocks.

| $\hat{H}^{\text{MS}}$ | $ 3,3\rangle$ | $ 3,2\rangle$ | $ 3,1\rangle$ | $ 3,0\rangle$ | $ 3,-1\rangle$ | $ 3,-2\rangle$ | $ 3,-3\rangle$ | $ 2,2\rangle$ | $ 2,1\rangle$ | $ 2,0\rangle$ | $ 2,-1\rangle$ | $ 2,-2\rangle$ | $ 1,1\rangle$ | $ 1,0\rangle$ | $ 1,-1\rangle$ | $ 0,0\rangle$ |
|-----------------------|---------------|---------------|---------------|---------------|----------------|----------------|----------------|---------------|---------------|---------------|----------------|----------------|---------------|---------------|----------------|---------------|
| $\langle 3,3  $       | 58.2          | 0             | 5.1           | 0             | 0              | 0              | 0              | 0             | 0             | 0             | 0              | 0              | 7.8-0.6i      | 0             | 0              | 0             |
| $\langle 3,2  $       | 0             | 23.3          | 0             | 7.2           | 0              | 0              | 0              | 0             | 0             | 0             | 0              | 0              | 0             | 4.5-0.3i      | 0              | 0             |
| $\langle 3,1  $       | 5.1           | 0             | 2.5           | 0             | 7.9            | 0              | 0              | 0             | 0             | 0             | 0              | 0              | 16.7          | 0             | 2.0-0.1i       | 0             |
| $\langle 3,0  $       | 0             | 7.2           | 0             | -4.5          | 0              | 7.2            | 0              | 0             | 0             | 0             | 0              | 0              | 0             | 20.4          | 0              | 0             |
| $\langle 3,-1  $      | 0             | 0             | 7.9           | 0             | 2.5            | 0              | 5.1            | 0             | 0             | 0             | 0              | 0              | 0             | 2.0+0.1i      | 0              | 16.7          |
| $\langle 3,-2  $      | 0             | 0             | 0             | 7.2           | 0              | 23.3           | 0              | 0             | 0             | 0             | 0              | 0              | 0             | 4.5+0.3i      | 0              | 0             |
| $\langle 3,-3  $      | 0             | 0             | 0             | 0             | 5.1            | 0              | 58.2           | 0             | 0             | 0             | 0              | 0              | 0             | 7.8+0.6i      | 0              | 0             |
| $\langle 2,2  $       | 0             | 0             | 0             | 0             | 0              | 0              | -7.4           | -0.1i         | 0.4-0.2i      | 0             | 0              | 0              | 0             | 0             | 0              | 9.6-0.5i      |
| $\langle 2,1  $       | 0             | 0             | 0             | 0             | 0              | 0              | 0.1i           | -7.3          | 0             | 0.5-0.3i      | 0              | 0              | 0             | 0             | 0              | 0.1-0.1i      |
| $\langle 2,0  $       | 0             | 0             | 0             | 0             | 0              | 0              | 0.4+0.2i       | 0             | -7.3          | 0             | 0.4-0.2i       | 0              | 0             | 0             | 0              | 33.7          |
| $\langle 2,-1  $      | 0             | 0             | 0             | 0             | 0              | 0              | 0              | 0.5+0.3i      | 0             | -7.3          | 0.1i           | 0              | 0             | 0             | 0              | -0.1-0.1i     |
| $\langle 2,-2  $      | 0             | 0             | 0             | 0             | 0              | 0              | 0              | 0             | -0.4-0.2i     | -0.1i         | -7.4           | 0              | 0             | 0             | 0              | 9.6+0.5i      |
| $\langle 1,1  $       | 7.8+0.6i      | 0             | 16.7          | 0             | 2.0-0.1i       | 0              | 0              | 0             | 0             | 0             | 0              | 0              | -42.4         | 0.1-9.3+0.4i  | 0              | 0             |
| $\langle 1,0  $       | 0             | 4.5+0.3i      | 0             | 20.4          | 0              | 4.5-0.3i       | 0              | 0             | 0             | 0             | 0              | 0              | 0.1           | -1.8          | -0.1           | 0             |
| $\langle 1,-1  $      | 0             | 0             | 2.0+0.1i      | 0             | 16.7           | 0              | 7.8-0.6i       | 0             | 0             | 0             | 0              | 0              | -9.3-0.4i     | -0.1          | -42.4          | 0             |
| $\langle 0,0  $       | 0             | 0             | 0             | 0             | 0              | 0              | 0              | 9.6+0.5i      | 0.1+0.1i      | 33.7          | -0.1+0.1i      | 9.6-0.5i       | 0             | 0             | 0              | -40.2         |

Table S13 Complex 1: Matrix elements, in  $\text{cm}^{-1}$ , of  $\hat{H}^{\text{eff}}$  expressed in the  $|M_{Sx}, M_{Sy}\rangle$  uncoupled-spin basis, obtained by basis transformation of the sign-revised, coupled-spin basis  $\hat{H}^{\text{eff}}$  of Table S12.

| $\hat{H}^{\text{MS}}$                 | $ \frac{3}{2}, \frac{3}{2}\rangle$ | $ \frac{3}{2}, \frac{1}{2}\rangle$ | $ \frac{1}{2}, \frac{3}{2}\rangle$ | $ \frac{1}{2}, \frac{1}{2}\rangle$ | $ \frac{3}{2}, -\frac{1}{2}\rangle$ | $ \frac{1}{2}, \frac{1}{2}\rangle$ | $ \frac{1}{2}, -\frac{1}{2}\rangle$ | $ \frac{3}{2}, -\frac{3}{2}\rangle$ | $ \frac{3}{2}, -\frac{1}{2}\rangle$ | $ \frac{1}{2}, -\frac{3}{2}\rangle$ | $ \frac{1}{2}, -\frac{1}{2}\rangle$ | $ \frac{3}{2}, -\frac{1}{2}\rangle$ | $ \frac{1}{2}, -\frac{3}{2}\rangle$ | $ \frac{3}{2}, -\frac{3}{2}\rangle$ | $ \frac{3}{2}, -\frac{1}{2}\rangle$ | $ \frac{1}{2}, -\frac{3}{2}\rangle$ |
|---------------------------------------|------------------------------------|------------------------------------|------------------------------------|------------------------------------|-------------------------------------|------------------------------------|-------------------------------------|-------------------------------------|-------------------------------------|-------------------------------------|-------------------------------------|-------------------------------------|-------------------------------------|-------------------------------------|-------------------------------------|-------------------------------------|
| $\langle \frac{3}{2}, \frac{3}{2}  $  | 58.2                               | 0                                  | 0                                  | 6.5-0.3i                           | -1.0+0.4i                           | 6.5-0.3i                           | 0                                   | 0                                   | 0                                   | 0                                   | 0                                   | 0                                   | 0                                   | 0                                   | 0                                   | 0                                   |
| $\langle \frac{3}{2}, \frac{1}{2}  $  | 0                                  | 8.0                                | 15.4                               | 0                                  | 0                                   | 6.8-0.4i                           | -0.5+0.2i                           | 5.9                                 | -0.3+0.1i                           | 0                                   | 0                                   | 0                                   | 0                                   | 0                                   | 0                                   | 0                                   |
| $\langle \frac{1}{2}, \frac{3}{2}  $  | 0                                  | 15.4                               | 8.0                                | 0                                  | 0                                   | -0.3+0.1i                          | 5.9                                 | -0.5+0.2i                           | 6.8-0.4i                            | 0                                   | 0                                   | 0                                   | 0                                   | 0                                   | 0                                   | 0                                   |
| $\langle \frac{3}{2}, -\frac{1}{2}  $ | 6.5+0.3i                           | 0                                  | 0                                  | -7.7                               | 17.9                                | -0.4                               | 0                                   | 0                                   | 0                                   | -0.1i                               | 6.2-0.2i                            | -0.5+0.2i                           | 0                                   | 0                                   | 0                                   | 0                                   |
| $\langle \frac{1}{2}, \frac{1}{2}  $  | -1.0-0.4i                          | 0                                  | 0                                  | 17.9                               | -31.8                               | 17.9                               | -7.7                                | 0                                   | 0                                   | 0                                   | 6.2-0.2i                            | -0.9+0.3i                           | 6.2-0.2i                            | 0                                   | 0                                   | 0                                   |
| $\langle \frac{1}{2}, \frac{3}{2}  $  | 6.5+0.3i                           | 0                                  | 0                                  | -0.4                               | 17.9                                | -7.7                               | 0                                   | 0                                   | 0                                   | 0                                   | -0.5+0.2i                           | 6.2-0.2i                            | -0.1i                               | 0                                   | 0                                   | 0                                   |
| $\langle \frac{3}{2}, -\frac{3}{2}  $ | 0                                  | 6.8+0.4i                           | -0.3-0.1i                          | 0                                  | 0                                   | 10.1                               | 16.0                                | -0.4                                | 0.1                                 | 0                                   | 0                                   | 6.8-0.4i                            | -0.3+0.1i                           | 0                                   | 0                                   | 0                                   |
| $\langle \frac{1}{2}, -\frac{1}{2}  $ | 0                                  | -0.5-0.2i                          | 5.9                                | 0                                  | 0                                   | 16.0                               | -37.0                               | -0.4                                | 20.5                                | 0                                   | 0                                   | -0.5+0.2i                           | 5.9                                 | 0                                   | 0                                   | 0                                   |
| $\langle \frac{1}{2}, \frac{1}{2}  $  | 0                                  | 5.9                                | -0.5-0.2i                          | 0                                  | 0                                   | -0.4                               | 20.5                                | -37.0                               | 16.0                                | 0                                   | 0                                   | 5.9                                 | -0.5+0.2i                           | 0                                   | 0                                   | 0                                   |
| $\langle \frac{3}{2}, \frac{3}{2}  $  | 0                                  | -0.3-0.1i                          | 6.8+0.4i                           | 0                                  | 0                                   | 0.1                                | -0.4                                | 16.0                                | 10.1                                | 0                                   | 0                                   | -0.3+0.1i                           | 6.8-0.4i                            | 0                                   | 0                                   | 0                                   |
| $\langle \frac{1}{2}, -\frac{3}{2}  $ | 0                                  | 0                                  | 0                                  | 0.1i                               | 6.2+0.2i                            | -0.5-0.2i                          | 0                                   | 0                                   | 0                                   | -7.7                                | 17.9                                | -0.4                                | 0                                   | 0                                   | 6.5-0.3i                            | 0                                   |
| $\langle \frac{1}{2}, -\frac{1}{2}  $ | 0                                  | 0                                  | 0                                  | 6.2+0.2i                           | -0.9-0.3i                           | 6.2+0.2i                           | 0                                   | 0                                   | 0                                   | 17.9                                | -31.8                               | 17.9                                | 0                                   | 0                                   | -1.0+0.4i                           | 0                                   |
| $\langle \frac{3}{2}, \frac{1}{2}  $  | 0                                  | 0                                  | 0                                  | -0.5-0.2i                          | 6.2+0.2i                            | 0.1i                               | 0                                   | 0                                   | 0                                   | -0.4                                | 17.9                                | -7.7                                | 0                                   | 0                                   | 6.5-0.3i                            | 0                                   |
| $\langle \frac{1}{2}, -\frac{3}{2}  $ | 0                                  | 0                                  | 0                                  | 0                                  | 0                                   | 6.5+0.3i                           | -0.8-0.3i                           | 6.2+0.2i                            | 0                                   | 0                                   | 0                                   | 0                                   | 8.0                                 | 15.4                                | 0                                   | 0                                   |
| $\langle \frac{3}{2}, -\frac{1}{2}  $ | 0                                  | 0                                  | 0                                  | 0                                  | 0                                   | 0                                  | 6.2+0.2i                            | -0.8-0.3i                           | 6.5+0.3i                            | 0                                   | 0                                   | 0                                   | 15.4                                | 8.0                                 | 0                                   | 0                                   |
| $\langle \frac{1}{2}, -\frac{1}{2}  $ | 0                                  | 0                                  | 0                                  | 0                                  | 0                                   | 0                                  | 0                                   | 0                                   | 0                                   | 6.5+0.3i                            | -1.0-0.4i                           | 6.5+0.3i                            | 0                                   | 0                                   | 58.2                                | 0                                   |

Table S14 Complex 1: Matrix elements of  $\hat{H}^{\text{MS}} - \hat{H}^{\text{eff}}$  ( $\text{cm}^{-1}$ ) expressed in the  $|M_{S_m}, M_{S_l}\rangle$  uncoupled-spin basis.  $\hat{H}^{\text{MS}}$  and the sign-revised  $\hat{H}^{\text{eff}}$  are taken from Tables S11 and S13 respectively.

| Diff.                                  | $ \frac{3}{2}, \frac{3}{2}\rangle$ | $ \frac{3}{2}, \frac{1}{2}\rangle$ | $ \frac{1}{2}, \frac{3}{2}\rangle$ | $ \frac{3}{2}, -\frac{1}{2}\rangle$ | $ \frac{1}{2}, \frac{1}{2}\rangle$ | $ \frac{1}{2}, -\frac{1}{2}\rangle$ | $ \frac{3}{2}, -\frac{3}{2}\rangle$ | $ \frac{3}{2}, -\frac{1}{2}\rangle$ | $ \frac{1}{2}, -\frac{3}{2}\rangle$ | $ \frac{1}{2}, -\frac{1}{2}\rangle$ | $ \frac{3}{2}, \frac{1}{2}\rangle$ | $ \frac{1}{2}, -\frac{3}{2}\rangle$ | $ \frac{3}{2}, -\frac{1}{2}\rangle$ | $ \frac{3}{2}, -\frac{3}{2}\rangle$ |
|----------------------------------------|------------------------------------|------------------------------------|------------------------------------|-------------------------------------|------------------------------------|-------------------------------------|-------------------------------------|-------------------------------------|-------------------------------------|-------------------------------------|------------------------------------|-------------------------------------|-------------------------------------|-------------------------------------|
| $\langle \frac{3}{2}, \frac{3}{2}  $   | 1.7                                | -0.1                               | -0.1 + 0.3i                        | 1.0 - 0.4i                          | -0.1 + 0.3i                        | 0                                   | 0                                   | 0                                   | 0                                   | 0                                   | 0                                  | 0                                   | 0                                   | 0                                   |
| $\langle \frac{3}{2}, \frac{1}{2}  $   | -0.1                               | 0.4                                | 1.4                                | 0                                   | 0                                  | -0.4 + 0.4i                         | 0.5 - 0.2i                          | 0.5                                 | 0.3 - 0.1i                          | 0                                   | 0                                  | 0                                   | 0                                   | 0                                   |
| $\langle \frac{1}{2}, \frac{3}{2}  $   | -0.1                               | 1.4                                | 0.4                                | 0                                   | 0                                  | 0.3 - 0.1i                          | 0.5 - 0.2i                          | -0.4 + 0.4i                         | 0                                   | 0                                   | 0                                  | 0                                   | 0                                   | 0                                   |
| $\langle \frac{3}{2}, -\frac{1}{2}  $  | -0.1 - 0.3i                        | 0                                  | -0.7                               | 1.4                                 | 0.4                                | 0                                   | -0.1i                               | 0                                   | 0.1i                                | 0.2 + 0.1i                          | 0.5 - 0.2i                         | 0                                   | 0                                   | 0                                   |
| $\langle \frac{1}{2}, \frac{1}{2}  $   | 1.0 + 0.4i                         | 0                                  | 1.4                                | -0.1                                | 1.4                                | 0                                   | 0                                   | 0                                   | 0.2 + 0.1i                          | 0.9 - 0.3i                          | 0.2 + 0.1i                         | 0                                   | 0                                   | 0                                   |
| $\langle -\frac{1}{2}, \frac{3}{2}  $  | -0.1 - 0.3i                        | 0                                  | 0.4                                | 1.4                                 | -0.7                               | 0                                   | -0.1i                               | 0                                   | 0.5 - 0.2i                          | 0.2 + 0.1i                          | 0.1i                               | 0                                   | 0                                   | 0                                   |
| $\langle \frac{3}{2}, -\frac{3}{2}  $  | 0                                  | -0.4 - 0.4i                        | 0.3 + 0.1i                         | -0.1i                               | 0                                  | -0.5                                | 0.8                                 | 0.4                                 | -0.1                                | -0.1i                               | 0                                  | -0.4 + 0.4i                         | 0.3 - 0.1i                          | 0                                   |
| $\langle \frac{1}{2}, -\frac{1}{2}  $  | 0                                  | 0.5 + 0.2i                         | 0.5                                | 0                                   | 0                                  | 0.8                                 | -0.5                                | 1.8                                 | 0.4                                 | 0                                   | 0                                  | 0.5 - 0.2i                          | 0.5                                 | 0                                   |
| $\langle -\frac{1}{2}, \frac{1}{2}  $  | 0                                  | 0.5                                | 0.5 + 0.2i                         | 0                                   | 0                                  | 0.4                                 | 1.8                                 | -0.5                                | 0.8                                 | 0                                   | 0                                  | 0                                   | 0.5 - 0.2i                          | 0                                   |
| $\langle \frac{3}{2}, \frac{1}{2}  $   | 0                                  | 0.3 + 0.1i                         | -0.4 - 0.4i                        | 0                                   | 0                                  | -0.1                                | 0.4                                 | 0.8                                 | -0.5                                | 0                                   | 0                                  | -0.1i                               | 0.3 - 0.1i                          | -0.4 + 0.4i                         |
| $\langle \frac{1}{2}, -\frac{3}{2}  $  | 0                                  | 0                                  | 0                                  | -0.1i                               | 0.2 - 0.1i                         | 0.5 + 0.2i                          | 0.1i                                | 0                                   | 0                                   | 0                                   | 0                                  | 0.4                                 | 0                                   | 0                                   |
| $\langle -\frac{1}{2}, -\frac{1}{2}  $ | 0                                  | 0                                  | 0                                  | 0.2 - 0.1i                          | 0.9 + 0.3i                         | 0.2 - 0.1i                          | 0                                   | 0                                   | 0                                   | 1.4                                 | -0.1                               | 1.4                                 | 0                                   | 0                                   |
| $\langle -\frac{3}{2}, \frac{3}{2}  $  | 0                                  | 0                                  | 0                                  | 0.5 + 0.2i                          | 0.2 - 0.1i                         | -0.1i                               | 0                                   | 0                                   | 0.1i                                | 0.4                                 | 1.4                                | -0.7                                | 0                                   | 0                                   |
| $\langle -\frac{1}{2}, -\frac{3}{2}  $ | 0                                  | 0                                  | 0                                  | 0                                   | 0                                  | 0                                   | -0.1 - 0.2i                         | 0.8 + 0.3i                          | 0.2 - 0.2i                          | 0                                   | 0                                  | 0                                   | 0.4                                 | 0.1                                 |
| $\langle -\frac{3}{2}, -\frac{1}{2}  $ | 0                                  | 0                                  | 0                                  | 0                                   | 0                                  | 0                                   | 0                                   | 0.2 - 0.2i                          | 0.8 + 0.3i                          | -0.1 - 0.2i                         | 0                                  | 0                                   | 1.4                                 | 0.4                                 |
| $\langle -\frac{3}{2}, -\frac{3}{2}  $ | 0                                  | 0                                  | 0                                  | 0                                   | 0                                  | 0                                   | 0                                   | 0                                   | 0                                   | -0.1 - 0.3i                         | 1.0 + 0.4i                         | -0.1 - 0.3i                         | 0.1                                 | 1.7                                 |

Table S15 Complex 1: Matrix elements of  $\hat{H}^{\text{MS}} - \hat{H}^{\text{eff}}$  ( $\text{cm}^{-1}$ ) expressed in the  $|S, M_S\rangle$  coupled-spin basis. The  $\hat{H}^{\text{MS}}$  and  $\hat{H}^{\text{eff}}$  matrices are taken from Tables S10 and S12 respectively.

| Diff.             | $ 3, 3\rangle$ | $ 3, 2\rangle$ | $ 3, 1\rangle$ | $ 3, 0\rangle$ | $ 3, -1\rangle$ | $ 3, -2\rangle$ | $ 3, -3\rangle$ | $ 2, 2\rangle$ | $ 2, 1\rangle$ | $ 2, 0\rangle$ | $ 2, -1\rangle$ | $ 2, -2\rangle$ | $ 1, 1\rangle$ | $ 1, 0\rangle$ | $ 1, -1\rangle$ | $ 0, 0\rangle$ |
|-------------------|----------------|----------------|----------------|----------------|-----------------|-----------------|-----------------|----------------|----------------|----------------|-----------------|-----------------|----------------|----------------|-----------------|----------------|
| $\langle 3, 3  $  | 1.7            | -0.1           | 0.7            | 0              | 0               | 0               | 0               | 0              | 0              | 0              | 0               | 0               | -0.8 + 0.5i    | 0              | 0               | 0              |
| $\langle 3, 2  $  | -0.1           | 1.8            | -0.1           | 0.9            | 0               | 0               | 0               | 0              | 0              | 0              | 0               | 0               | 0              | -0.4 + 0.3i    | 0               | 0              |
| $\langle 3, 1  $  | 0.7            | -0.1           | 1.8            | 0              | 1.0             | 0               | 0               | 0              | 0              | 0              | 0               | 0               | 0.3            | 0              | -0.2 + 0.1i     | 0              |
| $\langle 3, 0  $  | 0              | 0.9            | 0              | 1.8            | 0               | 0.9             | 0               | 0              | 0              | 0              | 0               | 0               | 0              | 0.4            | 0               | 0              |
| $\langle 3, -1  $ | 0              | 0              | 1.0            | 0              | 1.8             | 0.1             | 0.7             | 0              | 0              | 0              | 0               | 0               | -0.2 - 0.1i    | 0              | 0.3             | 0              |
| $\langle 3, -2  $ | 0              | 0              | 0              | 0.9            | 0               | 1.8             | 0.1             | 0              | 0              | 0              | 0               | 0               | 0              | -0.4 - 0.3i    | 0               | 0              |
| $\langle 3, -3  $ | 0              | 0              | 0              | 0              | 0.7             | 0.1             | 1.7             | 0              | 0              | 0              | 0               | 0               | 0              | 0              | -0.8 - 0.5i     | 0              |
| $\langle 2, 2  $  | 0              | 0              | 0              | 0              | 0               | 0               | 0               | -1.0           | 0.1i           | -0.4 + 0.2i    | 0               | 0               | 0              | 0              | 0               | -0.5 + 0.5i    |
| $\langle 2, 1  $  | 0              | 0              | 0              | 0              | 0               | 0               | 0               | -0.1i          | -1.1           | 0              | -0.5 + 0.3i     | 0               | 0              | 0              | 0               | 0.1i           |
| $\langle 2, 0  $  | 0              | 0              | 0              | 0              | 0               | 0               | 0               | -0.4 - 0.2i    | 0              | -1.1           | 0               | -0.4 + 0.2i     | 0              | 0              | 0               | 1.0            |
| $\langle 2, -1  $ | 0              | 0              | 0              | 0              | 0               | 0               | 0               | 0              | -0.5 - 0.3i    | 0              | -1.1            | -0.1i           | 0              | 0              | 0               | 0.1i           |
| $\langle 2, -2  $ | 0              | 0              | 0              | 0              | 0               | 0               | 0               | 0              | 0              | 0.4 + 0.2i     | 0.1i            | -1.0            | 0              | 0              | 0               | -0.5 - 0.5i    |
| $\langle 1, 1  $  | -0.8 - 0.5i    | 0              | 0.3            | 0              | -0.2 + 0.1i     | 0               | 0               | 0              | 0              | 0              | 0               | 0               | -2.2           | 0.1i           | 0.4 - 0.4i      | 0              |
| $\langle 1, 0  $  | 0              | -0.4 - 0.3i    | 0              | 0.4            | 0               | -0.4 + 0.3i     | 0               | 0              | 0              | 0              | 0               | 0               | -0.1i          | -1.1           | -0.1i           | 0              |
| $\langle 1, -1  $ | 0              | 0              | -0.2 - 0.1i    | 0              | 0.3             | 0               | -0.8 + 0.5i     | 0              | 0              | 0              | 0               | 0               | 0.4 + 0.4i     | 0.1i           | -2.2            | 0              |
| $\langle 0, 0  $  | 0              | 0              | 0              | 0              | 0               | 0               | 0               | -0.5 - 0.5i    | -0.1i          | 1.0            | -0.5 + 0.5i     | 0               | 0              | 0              | 0               | -1.7           |

Table S16 Complex 1: Matrix elements of  $\hat{H}^{\text{MS}} = \hat{J}_a^S \hat{S}_a + \hat{J}_b^S \hat{S}_b + \hat{J}_a \bar{D}_a \hat{S}_a + \hat{J}_b \bar{D}_b \hat{S}_b + \hat{S}_a \bar{D}_{ab} \hat{S}_b$  expressed in the  $|M_{S_x}, M_{S_y}\rangle$  uncoupled-spin basis.

| Diff.                                  | $ \frac{3}{2}, \frac{3}{2}\rangle$ | $ \frac{3}{2}, \frac{1}{2}\rangle$ | $ \frac{1}{2}, \frac{3}{2}\rangle$ | $ \frac{3}{2}, -\frac{1}{2}\rangle$ | $ \frac{1}{2}, \frac{1}{2}\rangle$ | $ \frac{1}{2}, -\frac{3}{2}\rangle$ | $ \frac{3}{2}, -\frac{3}{2}\rangle$ | $ \frac{1}{2}, -\frac{1}{2}\rangle$ | $ \frac{1}{2}, -\frac{3}{2}\rangle$ | $ \frac{3}{2}, \frac{1}{2}\rangle$ | $ \frac{1}{2}, -\frac{1}{2}\rangle$ | $ \frac{3}{2}, -\frac{1}{2}\rangle$ | $ \frac{1}{2}, -\frac{3}{2}\rangle$ | $ \frac{3}{2}, -\frac{3}{2}\rangle$ | $ \frac{1}{2}, -\frac{1}{2}\rangle$ | $ \frac{3}{2}, -\frac{1}{2}\rangle$ | $ \frac{1}{2}, -\frac{3}{2}\rangle$ |      |
|----------------------------------------|------------------------------------|------------------------------------|------------------------------------|-------------------------------------|------------------------------------|-------------------------------------|-------------------------------------|-------------------------------------|-------------------------------------|------------------------------------|-------------------------------------|-------------------------------------|-------------------------------------|-------------------------------------|-------------------------------------|-------------------------------------|-------------------------------------|------|
| $\langle \frac{3}{2}, \frac{3}{2}  $   | 58.2                               | 0                                  | 0                                  | 6.4                                 | -0.5                               | 6.4                                 | 0                                   | 0                                   | 0                                   | 0                                  | 0                                   | 0                                   | 0                                   | 0                                   | 0                                   | 0                                   | 0                                   | 0    |
| $\langle \frac{3}{2}, \frac{1}{2}  $   | 0                                  | 8.0                                | 15.6                               | 0                                   | 0                                  | 0                                   | 6.4                                 | -0.6                                | 6.4                                 | 0                                  | 0                                   | 0                                   | 0                                   | 0                                   | 0                                   | 0                                   | 0                                   | 0    |
| $\langle \frac{1}{2}, \frac{3}{2}  $   | 0                                  | 15.6                               | 8.0                                | 0                                   | 0                                  | 0                                   | 0                                   | 6.4                                 | -0.6                                | 6.4                                | 0                                   | 0                                   | 0                                   | 0                                   | 0                                   | 0                                   | 0                                   | 0    |
| $\langle \frac{3}{2}, -\frac{1}{2}  $  | 6.4                                | 0                                  | 0                                  | -8.0                                | 18.0                               | 0                                   | 0                                   | 0                                   | 0                                   | 0                                  | -0.5                                | 6.4                                 | 0                                   | 0                                   | 0                                   | 0                                   | 0                                   | 0    |
| $\langle \frac{1}{2}, \frac{1}{2}  $   | -0.5                               | 0                                  | 0                                  | 18.0                                | -31.6                              | 18.0                                | 0                                   | 0                                   | 0                                   | 0                                  | 0                                   | 6.4                                 | -0.7                                | 6.4                                 | 0                                   | 0                                   | 0                                   | 0    |
| $\langle \frac{1}{2}, -\frac{3}{2}  $  | 6.4                                | 0                                  | 0                                  | 0                                   | 18.0                               | -8.0                                | 0                                   | 0                                   | 0                                   | 0                                  | 0                                   | 0                                   | 6.4                                 | -0.5                                | 0                                   | 0                                   | 0                                   | 0    |
| $\langle \frac{3}{2}, -\frac{3}{2}  $  | 0                                  | 6.4                                | 0                                  | 0                                   | 0                                  | 0                                   | 10.3                                | 15.6                                | 0                                   | 0                                  | 0                                   | 0                                   | 0                                   | 0                                   | 6.4                                 | 0                                   | 0                                   | 0    |
| $\langle \frac{1}{2}, -\frac{1}{2}  $  | 0                                  | -0.6                               | 6.4                                | 0                                   | 0                                  | 0                                   | 15.6                                | -36.9                               | 20.3                                | 0                                  | 0                                   | 0                                   | 0                                   | 0                                   | -0.6                                | 6.4                                 | 0                                   | 0    |
| $\langle -\frac{3}{2}, \frac{3}{2}  $  | 0                                  | 6.4                                | -0.6                               | 0                                   | 0                                  | 0                                   | 0                                   | 20.3                                | -36.9                               | 15.6                               | 0                                   | 0                                   | 0                                   | 0                                   | 6.4                                 | -0.6                                | 0                                   | 0    |
| $\langle -\frac{3}{2}, \frac{1}{2}  $  | 0                                  | 0                                  | 6.4                                | 0                                   | 0                                  | 0                                   | 0                                   | 0                                   | 15.6                                | 10.3                               | 0                                   | 0                                   | 0                                   | 0                                   | 0                                   | 6.4                                 | 0                                   | 0    |
| $\langle -\frac{1}{2}, \frac{3}{2}  $  | 0                                  | 0                                  | 0                                  | -0.5                                | 6.4                                | 0                                   | 0                                   | 0                                   | 0                                   | 0                                  | -8.0                                | 18.0                                | 0                                   | 0                                   | 0                                   | 0                                   | 0                                   | 6.4  |
| $\langle -\frac{1}{2}, -\frac{1}{2}  $ | 0                                  | 0                                  | 0                                  | 6.4                                 | -0.7                               | 6.4                                 | 0                                   | 0                                   | 0                                   | 18.0                               | -31.6                               | 18.0                                | 0                                   | 0                                   | 0                                   | 0                                   | 0                                   | -0.5 |
| $\langle -\frac{3}{2}, -\frac{3}{2}  $ | 0                                  | 0                                  | 0                                  | 0                                   | 6.4                                | -0.5                                | 0                                   | 0                                   | 0                                   | 0                                  | 18.0                                | -8.0                                | 0                                   | 0                                   | 0                                   | 0                                   | 6.4                                 | 0    |
| $\langle -\frac{1}{2}, -\frac{3}{2}  $ | 0                                  | 0                                  | 0                                  | 0                                   | 0                                  | 0                                   | 6.4                                 | -0.6                                | 6.4                                 | 0                                  | 0                                   | 0                                   | 0                                   | 0                                   | 8.0                                 | 15.6                                | 0                                   | 0    |
| $\langle -\frac{3}{2}, -\frac{1}{2}  $ | 0                                  | 0                                  | 0                                  | 0                                   | 0                                  | 0                                   | 0                                   | 6.4                                 | -0.6                                | 6.4                                | 0                                   | 0                                   | 0                                   | 0                                   | 15.6                                | 8.0                                 | 0                                   | 0    |
| $\langle -\frac{1}{2}, -\frac{1}{2}  $ | 0                                  | 0                                  | 0                                  | 0                                   | 0                                  | 0                                   | 0                                   | 0                                   | 0                                   | 0                                  | 6.4                                 | -0.5                                | 6.4                                 | 0                                   | 0                                   | 0                                   | 0                                   | 58.2 |

Table S17 Complex 1: Matrix elements of  $\hat{H}^{\text{MS}} = \hat{J}_a^S \hat{S}_a + \hat{J}_b^S \hat{S}_b + \hat{J}_a \bar{D}_a \hat{S}_a + \hat{J}_b \bar{D}_b \hat{S}_b + \hat{S}_a \bar{D}_{ab} \hat{S}_b$  expressed in the  $|S_x, M_{S_x}\rangle$  coupled-spin basis.

| Diff.             | $ 3, 3\rangle$ | $ 3, 2\rangle$ | $ 3, 1\rangle$ | $ 3, 0\rangle$ | $ 3, -1\rangle$ | $ 3, -2\rangle$ | $ 3, -3\rangle$ | $ 2, 2\rangle$ | $ 2, 1\rangle$ | $ 2, 0\rangle$ | $ 2, -1\rangle$ | $ 2, -2\rangle$ | $ 1, 1\rangle$ | $ 1, 0\rangle$ | $ 1, -1\rangle$ | $ 0, 0\rangle$ |
|-------------------|----------------|----------------|----------------|----------------|-----------------|-----------------|-----------------|----------------|----------------|----------------|-----------------|-----------------|----------------|----------------|-----------------|----------------|
| $\langle 3, 3  $  | 58.2           | 0              | 5.3            | 0              | 0               | 0               | 0               | 0              | 0              | 0              | 0               | 0               | 0              | 7.3            | 0               | 0              |
| $\langle 3, 2  $  | 0              | 23.6           | 0              | 7.5            | 0               | 0               | 0               | 0              | 0              | 0              | 0               | 0               | 0              | 4.2            | 0               | 0              |
| $\langle 3, 1  $  | 5.3            | 0              | 2.8            | 0              | 8.2             | 0               | 0               | 0              | 0              | 0              | 0               | 0               | 16.7           | 0              | 1.9             | 0              |
| $\langle 3, 0  $  | 0              | 7.5            | 0              | -4.6           | 0               | 7.5             | 0               | 0              | 0              | 0              | 0               | 0               | 0              | 20.6           | 0               | 0              |
| $\langle 3, -1  $ | 0              | 0              | 8.2            | 0              | 2.8             | 0               | 5.3             | 0              | 0              | 0              | 0               | 0               | 1.9            | 0              | 16.7            | 0              |
| $\langle 3, -2  $ | 0              | 0              | 0              | 7.5            | 0               | 23.6            | 0               | 0              | 0              | 0              | 0               | 0               | 0              | 4.2            | 0               | 0              |
| $\langle 3, -3  $ | 0              | 0              | 0              | 0              | 5.3             | 0               | 58.2            | 0              | 0              | 0              | 0               | 0               | 0              | 0              | 7.3             | 0              |
| $\langle 2, 2  $  | 0              | 0              | 0              | 0              | 0               | 0               | 0               | -7.6           | 0              | -0.4           | 0               | 0               | 0              | 0              | 0               | 9.4            |
| $\langle 2, 1  $  | 0              | 0              | 0              | 0              | 0               | 0               | 0               | 0              | -8.0           | 0              | -0.5            | 0               | 0              | 0              | 0               | 0              |
| $\langle 2, 0  $  | 0              | 0              | 0              | 0              | 0               | 0               | 0               | 0              | -0.4           | 0              | -7.9            | 0               | -0.4           | 0              | 0               | 33.8           |
| $\langle 2, -1  $ | 0              | 0              | 0              | 0              | 0               | 0               | 0               | 0              | 0              | -0.5           | 0               | -8.0            | 0              | 0              | 0               | 0              |
| $\langle 2, -2  $ | 0              | 0              | 0              | 0              | 0               | 0               | 0               | 0              | 0              | 0              | -0.4            | 0               | -7.6           | 0              | 0               | 9.4            |
| $\langle 1, 1  $  | 7.3            | 0              | 16.7           | 0              | 1.9             | 0               | 0               | 0              | 0              | 0              | 0               | 0               | -42.4          | 0              | -9.4            | 0              |
| $\langle 1, 0  $  | 0              | 4.2            | 0              | 20.6           | 0               | 4.2             | 0               | 0              | 0              | 0              | 0               | 0               | 0              | -1.7           | 0               | 0              |
| $\langle 1, -1  $ | 0              | 0              | 1.9            | 0              | 16.7            | 0               | 7.3             | 0              | 0              | 0              | 0               | 0               | -9.4           | 0              | -42.4           | 0              |
| $\langle 0, 0  $  | 0              | 0              | 0              | 0              | 0               | 0               | 0               | 9.4            | 0              | 33.8           | 0               | 9.4             | 0              | 0              | 0               | -39.0          |

Table S18 Complex 1: Difference between the numerical matrix elements of  $\hat{H}^{\text{MS}} = J\hat{S}_a\hat{S}_b + \hat{S}_a\bar{D}_a\hat{S}_a + \hat{S}_b\bar{D}_b\hat{S}_b + \hat{S}_a\bar{D}_{ab}\hat{S}_b + \hat{S}_b\bar{D}_{ab}\hat{S}_a$  (Table S16) and  $\hat{H}^{\text{eff}}$  (Table S13) expressed in the  $|M_{S_a}, M_{S_b}\rangle$  uncoupled-spin basis.

| Diff.                                 | $ \frac{3}{2}, \frac{3}{2}\rangle$ | $ \frac{3}{2}, \frac{1}{2}\rangle$ | $ \frac{1}{2}, \frac{3}{2}\rangle$ | $ \frac{1}{2}, \frac{1}{2}\rangle$ | $ \frac{3}{2}, -\frac{1}{2}\rangle$ | $ \frac{1}{2}, -\frac{3}{2}\rangle$ | $ \frac{3}{2}, -\frac{3}{2}\rangle$ | $ \frac{1}{2}, -\frac{1}{2}\rangle$ | $ \frac{1}{2}, -\frac{1}{2}\rangle$ | $ \frac{1}{2}, -\frac{3}{2}\rangle$ | $ \frac{3}{2}, -\frac{1}{2}\rangle$ | $ \frac{1}{2}, -\frac{3}{2}\rangle$ | $ \frac{3}{2}, -\frac{3}{2}\rangle$ |
|---------------------------------------|------------------------------------|------------------------------------|------------------------------------|------------------------------------|-------------------------------------|-------------------------------------|-------------------------------------|-------------------------------------|-------------------------------------|-------------------------------------|-------------------------------------|-------------------------------------|-------------------------------------|
| $\langle \frac{3}{2}, \frac{3}{2}  $  | 0                                  | 0                                  | 0                                  | 0                                  | 0                                   | 0                                   | 0                                   | 0                                   | 0                                   | 0                                   | 0                                   | 0                                   | 0                                   |
| $\langle \frac{3}{2}, \frac{1}{2}  $  | 0                                  | 0                                  | 0.2                                | 0                                  | 0                                   | -0.4+0.4i                           | -0.1-0.2i                           | 0.4                                 | 0.3-0.1i                            | 0                                   | 0                                   | 0                                   | 0                                   |
| $\langle \frac{1}{2}, \frac{3}{2}  $  | 0                                  | 0.2                                | 0                                  | 0                                  | 0                                   | 0.3-0.1i                            | 0.4                                 | -0.1-0.2i                           | -0.4+0.4i                           | 0                                   | 0                                   | 0                                   | 0                                   |
| $\langle \frac{1}{2}, \frac{1}{2}  $  | -0.1-0.3i                          | 0                                  | 0                                  | -0.3                               | 0.1                                 | 0.4                                 | 0                                   | 0                                   | -0.5+0.1i                           | 0.1+0.2i                            | 0.5-0.2i                            | 0                                   | 0                                   |
| $\langle \frac{3}{2}, -\frac{1}{2}  $ | 0                                  | 0                                  | 0                                  | 0.1                                | 0.2                                 | 0                                   | 0                                   | 0                                   | 0.1+0.2i                            | 0.3-0.3i                            | 0.1+0.2i                            | 0                                   | 0                                   |
| $\langle \frac{1}{2}, -\frac{3}{2}  $ | 0                                  | 0                                  | 0                                  | 0.4                                | 0.1                                 | -0.3                                | 0                                   | 0                                   | 0.5-0.2i                            | 0.1+0.2i                            | -0.5+0.1i                           | 0                                   | 0                                   |
| $\langle \frac{1}{2}, -\frac{1}{2}  $ | 0                                  | -0.4-0.4i                          | 0.3+0.1i                           | 0                                  | 0                                   | 0.2                                 | -0.4                                | 0.4                                 | -0.1                                | 0                                   | 0                                   | -0.4+0.4i                           | 0.3-0.1i                            |
| $\langle \frac{3}{2}, -\frac{3}{2}  $ | 0                                  | -0.1+0.2i                          | 0.4                                | 0                                  | 0                                   | -0.4                                | 0                                   | -0.2                                | 0.4                                 | 0                                   | 0                                   | -0.1-0.2i                           | 0.4                                 |
| $\langle \frac{1}{2}, -\frac{1}{2}  $ | 0                                  | 0.4                                | -0.1+0.2i                          | 0                                  | 0                                   | 0.4                                 | -0.2                                | 0                                   | -0.4                                | 0                                   | 0                                   | 0.4                                 | -0.1-0.2i                           |
| $\langle \frac{3}{2}, -\frac{1}{2}  $ | 0                                  | 0.3+0.1i                           | -0.4-0.4i                          | 0                                  | 0                                   | -0.1                                | 0.4                                 | -0.4                                | 0.2                                 | 0                                   | 0                                   | 0.3-0.1i                            | -0.4+0.4i                           |
| $\langle \frac{1}{2}, -\frac{3}{2}  $ | 0                                  | 0                                  | 0                                  | -0.5-0.1i                          | 0.1-0.2i                            | 0.5+0.2i                            | 0                                   | 0                                   | 0                                   | -0.3                                | 0.1                                 | 0.4                                 | 0                                   |
| $\langle \frac{1}{2}, -\frac{1}{2}  $ | 0                                  | 0                                  | 0                                  | 0.1-0.2i                           | 0.3+0.3i                            | 0.1-0.2i                            | 0                                   | 0                                   | 0                                   | 0.1                                 | 0.2                                 | 0.1                                 | 0                                   |
| $\langle \frac{3}{2}, -\frac{3}{2}  $ | 0                                  | 0                                  | 0                                  | 0.5+0.2i                           | 0.1-0.2i                            | -0.5-0.1i                           | 0                                   | 0                                   | 0                                   | 0.4                                 | 0.1                                 | -0.3                                | 0                                   |
| $\langle \frac{1}{2}, -\frac{1}{2}  $ | 0                                  | 0                                  | 0                                  | 0                                  | 0                                   | 0                                   | -0.1-0.3i                           | 0.2+0.3i                            | 0.1-0.2i                            | 0                                   | 0                                   | 0                                   | 0                                   |
| $\langle \frac{3}{2}, -\frac{1}{2}  $ | 0                                  | 0                                  | 0                                  | 0                                  | 0                                   | 0                                   | 0                                   | 0.1-0.2i                            | 0.2+0.3i                            | -0.1-0.3i                           | 0                                   | 0                                   | 0.2                                 |
| $\langle \frac{1}{2}, -\frac{3}{2}  $ | 0                                  | 0                                  | 0                                  | 0                                  | 0                                   | 0                                   | 0                                   | 0                                   | 0                                   | 0                                   | 0                                   | 0                                   | 0                                   |
| $\langle \frac{1}{2}, -\frac{1}{2}  $ | 0                                  | 0                                  | 0                                  | 0                                  | 0                                   | 0                                   | 0                                   | 0                                   | 0                                   | -0.1-0.3i                           | 0.5+0.4i                            | -0.1-0.3i                           | 0                                   |

Table S19 Complex 1: Difference between the numerical matrix elements of  $\hat{H}^{\text{MS}} = J\hat{S}_a\hat{S}_b + \hat{S}_a\bar{D}_a\hat{S}_a + \hat{S}_b\bar{D}_b\hat{S}_b + \hat{S}_a\bar{D}_{ab}\hat{S}_b + \hat{S}_b\bar{D}_{ab}\hat{S}_a$  (Table S17) and  $\hat{H}^{\text{eff}}$  (Table S12) expressed in the  $|S, M_S\rangle$  coupled-spin basis.

| Diff.             | $ 3, 3\rangle$ | $ 3, 2\rangle$ | $ 3, 1\rangle$ | $ 3, 0\rangle$ | $ 3, -1\rangle$ | $ 3, -2\rangle$ | $ 3, -3\rangle$ | $ 2, 2\rangle$ | $ 2, 1\rangle$ | $ 2, 0\rangle$ | $ 2, -1\rangle$ | $ 2, -2\rangle$ | $ 1, 1\rangle$ | $ 1, 0\rangle$ | $ 1, -1\rangle$ | $ 0, 0\rangle$ |
|-------------------|----------------|----------------|----------------|----------------|-----------------|-----------------|-----------------|----------------|----------------|----------------|-----------------|-----------------|----------------|----------------|-----------------|----------------|
| $\langle 3, 3  $  | 0              | 0              | 0.2            | 0              | 0               | 0               | 0               | 0              | 0              | 0              | 0               | 0               | -0.5+0.6i      | 0              | 0               | 0              |
| $\langle 3, 2  $  | 0              | 0.3            | 0              | 0.3            | 0               | 0               | 0               | 0              | 0              | 0              | 0               | 0               | 0              | -0.2+0.3i      | 0               | 0              |
| $\langle 3, 1  $  | 0.2            | 0              | 0.3            | 0              | 0.3             | 0               | 0               | 0              | 0              | 0              | 0               | 0               | 0              | 0              | -0.1+0.1i       | 0              |
| $\langle 3, 0  $  | 0              | 0.3            | 0              | -0.1           | 0               | 0.3             | 0               | 0              | 0              | 0              | 0               | 0               | 0              | 0.1            | 0               | 0              |
| $\langle 3, -1  $ | 0              | 0              | 0.3            | 0              | 0.3             | 0               | 0.2             | 0              | 0              | 0              | 0               | 0               | -0.1-0.1i      | 0              | 0               | 0              |
| $\langle 3, -2  $ | 0              | 0              | 0              | 0.3            | 0               | 0.3             | 0               | 0              | 0              | 0              | 0               | 0               | 0              | -0.2-0.3i      | 0               | 0              |
| $\langle 3, -3  $ | 0              | 0              | 0              | 0              | 0.2             | 0               | 0               | 0              | 0              | 0              | 0               | 0               | 0              | 0              | -0.5-0.6i       | 0              |
| $\langle 2, 2  $  | 0              | 0              | 0              | 0              | 0               | 0               | -0.2            | 0.1i           | -0.9+0.2i      | 0              | 0               | 0               | 0              | 0              | 0               | -0.2+0.5i      |
| $\langle 2, 1  $  | 0              | 0              | 0              | 0              | 0               | 0               | -0.1i           | -0.7           | -1.0+0.3i      | 0              | 0               | 0               | 0              | 0              | 0               | -0.1+0.1i      |
| $\langle 2, 0  $  | 0              | 0              | 0              | 0              | 0               | 0               | 0               | -0.9-0.2i      | 0              | -0.6           | -0.9+0.2i       | 0               | 0              | 0              | 0               | 0              |
| $\langle 2, -1  $ | 0              | 0              | 0              | 0              | 0               | 0               | 0               | -1.0-0.3i      | 0              | -0.7           | -0.1i           | 0               | 0              | 0              | 0               | 0.1+0.1i       |
| $\langle 2, -2  $ | 0              | 0              | 0              | 0              | 0               | 0               | 0               | 0              | 0.2i           | 0.1i           | -0.2            | 0               | 0              | 0              | 0               | -0.2-0.5i      |
| $\langle 1, 1  $  | -0.5-0.6i      | 0              | 0              | 0              | 0               | -0.1+0.1i       | 0               | 0              | 0              | 0              | 0               | 0               | 0              | -0.1-0.1-0.4i  | 0               | 0              |
| $\langle 1, 0  $  | 0              | -0.2-0.3i      | 0              | 0.1            | 0               | -0.2+0.3i       | 0               | 0              | 0              | 0              | 0               | 0               | -0.1           | 0.1            | 0.1             | 0              |
| $\langle 1, -1  $ | 0              | 0              | -0.1-0.1i      | 0              | 0               | 0               | -0.5+0.6i       | 0              | 0              | 0              | 0               | 0               | -0.1+0.4i      | 0.1            | 0               | 0              |
| $\langle 0, 0  $  | 0              | 0              | 0              | 0              | 0               | 0               | 0               | -0.2-0.5i      | -0.1-0.1i      | 0              | 0.1-0.1i        | -0.2+0.5i       | 0              | 0              | 0               | 1.1            |

Table S20 Analytical matrix elements of  $\hat{H}^{zee} = \mu_B \vec{B} \hat{g}_a \hat{S}_a$  expressed in the  $|M_{S_a}, M_{S_b}\rangle$  uncoupled-spin basis.<sup>a</sup>

| $\mu_B \vec{B} \hat{g}_a \hat{S}_a$ | $ \frac{3}{2}, \frac{3}{2}\rangle$ | $ \frac{3}{2}, \frac{1}{2}\rangle$ | $ \frac{1}{2}, \frac{3}{2}\rangle$ | $ \frac{3}{2}, -\frac{1}{2}\rangle$ | $ \frac{1}{2}, \frac{1}{2}\rangle$ | $ \frac{1}{2}, \frac{3}{2}\rangle$ | $ \frac{3}{2}, -\frac{3}{2}\rangle$ | $ \frac{1}{2}, -\frac{1}{2}\rangle$ | $ \frac{1}{2}, \frac{1}{2}\rangle$ | $ \frac{3}{2}, \frac{3}{2}\rangle$ | $ \frac{1}{2}, -\frac{3}{2}\rangle$ | $ \frac{1}{2}, -\frac{1}{2}\rangle$ | $ \frac{3}{2}, \frac{1}{2}\rangle$ | $ \frac{1}{2}, -\frac{3}{2}\rangle$ | $ \frac{3}{2}, -\frac{1}{2}\rangle$ | $ \frac{3}{2}, -\frac{3}{2}\rangle$ |
|-------------------------------------|------------------------------------|------------------------------------|------------------------------------|-------------------------------------|------------------------------------|------------------------------------|-------------------------------------|-------------------------------------|------------------------------------|------------------------------------|-------------------------------------|-------------------------------------|------------------------------------|-------------------------------------|-------------------------------------|-------------------------------------|
| $ \frac{3}{2}, \frac{3}{2}\rangle$  | -X                                 | 0                                  | Y                                  | 0                                   | 0                                  | 0                                  | 0                                   | 0                                   | 0                                  | 0                                  | 0                                   | 0                                   | 0                                  | 0                                   | 0                                   | 0                                   |
| $ \frac{3}{2}, \frac{1}{2}\rangle$  | 0                                  | -X                                 | 0                                  | 0                                   | Y                                  | 0                                  | 0                                   | 0                                   | 0                                  | 0                                  | 0                                   | 0                                   | 0                                  | 0                                   | 0                                   | 0                                   |
| $ \frac{1}{2}, \frac{3}{2}\rangle$  | Y*                                 | 0                                  | -Z                                 | 0                                   | 0                                  | T                                  | 0                                   | 0                                   | 0                                  | 0                                  | 0                                   | 0                                   | 0                                  | 0                                   | 0                                   | 0                                   |
| $ \frac{3}{2}, -\frac{1}{2}\rangle$ | 0                                  | 0                                  | 0                                  | -X                                  | 0                                  | 0                                  | 0                                   | Y                                   | 0                                  | 0                                  | 0                                   | 0                                   | 0                                  | 0                                   | 0                                   | 0                                   |
| $ \frac{1}{2}, \frac{1}{2}\rangle$  | 0                                  | Y*                                 | 0                                  | 0                                   | -Z                                 | 0                                  | 0                                   | 0                                   | T                                  | 0                                  | 0                                   | 0                                   | 0                                  | 0                                   | 0                                   | 0                                   |
| $ \frac{1}{2}, \frac{3}{2}\rangle$  | 0                                  | 0                                  | T*                                 | 0                                   | 0                                  | Z                                  | 0                                   | 0                                   | 0                                  | Y                                  | 0                                   | 0                                   | 0                                  | 0                                   | 0                                   | 0                                   |
| $ \frac{3}{2}, -\frac{3}{2}\rangle$ | 0                                  | 0                                  | 0                                  | 0                                   | 0                                  | 0                                  | -X                                  | 0                                   | 0                                  | 0                                  | Y                                   | 0                                   | 0                                  | 0                                   | 0                                   | 0                                   |
| $ \frac{1}{2}, -\frac{1}{2}\rangle$ | 0                                  | 0                                  | 0                                  | Y*                                  | 0                                  | 0                                  | 0                                   | -Z                                  | 0                                  | 0                                  | 0                                   | T                                   | 0                                  | 0                                   | 0                                   | 0                                   |
| $ \frac{1}{2}, \frac{1}{2}\rangle$  | 0                                  | 0                                  | 0                                  | 0                                   | T*                                 | 0                                  | 0                                   | Z                                   | 0                                  | 0                                  | 0                                   | 0                                   | Y                                  | 0                                   | 0                                   | 0                                   |
| $ \frac{3}{2}, \frac{3}{2}\rangle$  | 0                                  | 0                                  | 0                                  | 0                                   | 0                                  | Y*                                 | 0                                   | 0                                   | 0                                  | X                                  | 0                                   | 0                                   | 0                                  | 0                                   | 0                                   | 0                                   |
| $ \frac{1}{2}, -\frac{3}{2}\rangle$ | 0                                  | 0                                  | 0                                  | 0                                   | 0                                  | 0                                  | Y*                                  | 0                                   | 0                                  | 0                                  | -Z                                  | 0                                   | 0                                  | T                                   | 0                                   | 0                                   |
| $ \frac{1}{2}, -\frac{1}{2}\rangle$ | 0                                  | 0                                  | 0                                  | 0                                   | 0                                  | 0                                  | 0                                   | T*                                  | 0                                  | 0                                  | 0                                   | Z                                   | 0                                  | 0                                   | Y                                   | 0                                   |
| $ \frac{3}{2}, \frac{1}{2}\rangle$  | 0                                  | 0                                  | 0                                  | 0                                   | 0                                  | 0                                  | 0                                   | 0                                   | Y*                                 | 0                                  | 0                                   | 0                                   | X                                  | 0                                   | 0                                   | 0                                   |
| $ \frac{1}{2}, -\frac{3}{2}\rangle$ | 0                                  | 0                                  | 0                                  | 0                                   | 0                                  | 0                                  | 0                                   | 0                                   | 0                                  | 0                                  | T*                                  | 0                                   | 0                                  | Z                                   | 0                                   | Y                                   |
| $ \frac{1}{2}, -\frac{1}{2}\rangle$ | 0                                  | 0                                  | 0                                  | 0                                   | 0                                  | 0                                  | 0                                   | 0                                   | 0                                  | 0                                  | 0                                   | 0                                   | Y*                                 | 0                                   | 0                                   | X                                   |
| $ \frac{3}{2}, -\frac{3}{2}\rangle$ | 0                                  | 0                                  | 0                                  | 0                                   | 0                                  | 0                                  | 0                                   | 0                                   | 0                                  | 0                                  | 0                                   | 0                                   | 0                                  | Y*                                  | 0                                   | X                                   |

<sup>a</sup>Legend:

$X = -\frac{3}{2}\mu_B (B_x g_{xz}^a + B_y g_{yz}^a + B_z g_{zz}^a)$ ;  $Y = \frac{\sqrt{3}}{2}\mu_B [(B_x g_{xx}^a + B_y g_{yx}^a + B_z g_{zx}^a) - i(B_x g_{xy}^a + B_y g_{yy}^a + B_z g_{zy}^a)]$   
 $Z = -\frac{1}{2}\mu_B (B_x g_{xz}^a + B_y g_{yz}^a + B_z g_{zz}^a)$ ;  $T = \mu_B [(B_x g_{xx}^a + B_y g_{yx}^a + B_z g_{zx}^a) - i(B_x g_{xy}^a + B_y g_{yy}^a + B_z g_{zy}^a)]$ ; the asterisk stands for complex conjugate.

Table S21 Analytical matrix elements of  $\hat{H}^{zee} = \mu_B \vec{B} \hat{g}_b \hat{S}_b$  expressed in the  $|M_{S_a}, M_{S_b}\rangle$  uncoupled-spin basis.<sup>a</sup>

| $\mu_B \vec{B} \hat{g}_b \hat{S}_b$ | $ \frac{3}{2}, \frac{3}{2}\rangle$ | $ \frac{3}{2}, \frac{1}{2}\rangle$ | $ \frac{1}{2}, \frac{3}{2}\rangle$ | $ \frac{3}{2}, -\frac{1}{2}\rangle$ | $ \frac{1}{2}, \frac{1}{2}\rangle$ | $ \frac{1}{2}, \frac{3}{2}\rangle$ | $ \frac{3}{2}, -\frac{3}{2}\rangle$ | $ \frac{1}{2}, -\frac{1}{2}\rangle$ | $ \frac{1}{2}, \frac{1}{2}\rangle$ | $ \frac{3}{2}, \frac{3}{2}\rangle$ | $ \frac{1}{2}, -\frac{3}{2}\rangle$ | $ \frac{1}{2}, -\frac{1}{2}\rangle$ | $ \frac{3}{2}, \frac{1}{2}\rangle$ | $ \frac{1}{2}, -\frac{3}{2}\rangle$ | $ \frac{3}{2}, -\frac{1}{2}\rangle$ | $ \frac{3}{2}, -\frac{3}{2}\rangle$ |
|-------------------------------------|------------------------------------|------------------------------------|------------------------------------|-------------------------------------|------------------------------------|------------------------------------|-------------------------------------|-------------------------------------|------------------------------------|------------------------------------|-------------------------------------|-------------------------------------|------------------------------------|-------------------------------------|-------------------------------------|-------------------------------------|
| $ \frac{3}{2}, \frac{3}{2}\rangle$  | -X                                 | Y                                  | 0                                  | 0                                   | 0                                  | 0                                  | 0                                   | 0                                   | 0                                  | 0                                  | 0                                   | 0                                   | 0                                  | 0                                   | 0                                   | 0                                   |
| $ \frac{3}{2}, \frac{1}{2}\rangle$  | Y*                                 | -Z                                 | 0                                  | T                                   | 0                                  | 0                                  | 0                                   | 0                                   | 0                                  | 0                                  | 0                                   | 0                                   | 0                                  | 0                                   | 0                                   | 0                                   |
| $ \frac{1}{2}, \frac{3}{2}\rangle$  | 0                                  | 0                                  | -X                                 | 0                                   | Y                                  | 0                                  | 0                                   | 0                                   | 0                                  | 0                                  | 0                                   | 0                                   | 0                                  | 0                                   | 0                                   | 0                                   |
| $ \frac{3}{2}, -\frac{1}{2}\rangle$ | 0                                  | T*                                 | 0                                  | Z                                   | 0                                  | 0                                  | Y                                   | 0                                   | 0                                  | 0                                  | 0                                   | 0                                   | 0                                  | 0                                   | 0                                   | 0                                   |
| $ \frac{1}{2}, \frac{1}{2}\rangle$  | 0                                  | 0                                  | Y*                                 | 0                                   | -Z                                 | 0                                  | 0                                   | T                                   | 0                                  | 0                                  | 0                                   | 0                                   | 0                                  | 0                                   | 0                                   | 0                                   |
| $ \frac{1}{2}, \frac{3}{2}\rangle$  | 0                                  | 0                                  | 0                                  | 0                                   | 0                                  | -X                                 | 0                                   | 0                                   | Y                                  | 0                                  | 0                                   | 0                                   | 0                                  | 0                                   | 0                                   | 0                                   |
| $ \frac{3}{2}, -\frac{3}{2}\rangle$ | 0                                  | 0                                  | 0                                  | Y*                                  | 0                                  | 0                                  | X                                   | 0                                   | 0                                  | 0                                  | 0                                   | 0                                   | 0                                  | 0                                   | 0                                   | 0                                   |
| $ \frac{1}{2}, -\frac{1}{2}\rangle$ | 0                                  | 0                                  | 0                                  | 0                                   | T*                                 | 0                                  | 0                                   | Z                                   | 0                                  | 0                                  | Y                                   | 0                                   | 0                                  | 0                                   | 0                                   | 0                                   |
| $ \frac{1}{2}, \frac{1}{2}\rangle$  | 0                                  | 0                                  | 0                                  | 0                                   | 0                                  | 0                                  | 0                                   | -Z                                  | 0                                  | 0                                  | T                                   | 0                                   | 0                                  | 0                                   | 0                                   | 0                                   |
| $ \frac{3}{2}, \frac{3}{2}\rangle$  | 0                                  | 0                                  | 0                                  | 0                                   | 0                                  | 0                                  | 0                                   | 0                                   | -X                                 | 0                                  | 0                                   | Y                                   | 0                                  | 0                                   | 0                                   | 0                                   |
| $ \frac{1}{2}, -\frac{3}{2}\rangle$ | 0                                  | 0                                  | 0                                  | 0                                   | 0                                  | 0                                  | 0                                   | Y*                                  | 0                                  | 0                                  | X                                   | 0                                   | 0                                  | 0                                   | 0                                   | 0                                   |
| $ \frac{1}{2}, -\frac{1}{2}\rangle$ | 0                                  | 0                                  | 0                                  | 0                                   | 0                                  | 0                                  | 0                                   | 0                                   | T*                                 | 0                                  | 0                                   | Z                                   | 0                                  | Y                                   | 0                                   | 0                                   |
| $ \frac{3}{2}, \frac{1}{2}\rangle$  | 0                                  | 0                                  | 0                                  | 0                                   | 0                                  | 0                                  | 0                                   | 0                                   | 0                                  | Y*                                 | 0                                   | 0                                   | -Z                                 | 0                                   | T                                   | 0                                   |
| $ \frac{1}{2}, -\frac{3}{2}\rangle$ | 0                                  | 0                                  | 0                                  | 0                                   | 0                                  | 0                                  | 0                                   | 0                                   | 0                                  | 0                                  | 0                                   | 0                                   | Y*                                 | 0                                   | X                                   | 0                                   |
| $ \frac{1}{2}, -\frac{1}{2}\rangle$ | 0                                  | 0                                  | 0                                  | 0                                   | 0                                  | 0                                  | 0                                   | 0                                   | 0                                  | 0                                  | 0                                   | 0                                   | 0                                  | T*                                  | 0                                   | Y                                   |
| $ \frac{3}{2}, -\frac{3}{2}\rangle$ | 0                                  | 0                                  | 0                                  | 0                                   | 0                                  | 0                                  | 0                                   | 0                                   | 0                                  | 0                                  | 0                                   | 0                                   | 0                                  | 0                                   | Y*                                  | X                                   |

<sup>a</sup>Legend:

$X = -\frac{3}{2}\mu_B (B_x g_{xz}^b + B_y g_{yz}^b + B_z g_{zz}^b)$ ;  $Y = \frac{\sqrt{3}}{2}\mu_B [(B_x g_{xx}^b + B_y g_{yx}^b + B_z g_{zx}^b) - i(B_x g_{xy}^b + B_y g_{yy}^b + B_z g_{zy}^b)]$   
 $Z = -\frac{1}{2}\mu_B (B_x g_{xz}^b + B_y g_{yz}^b + B_z g_{zz}^b)$ ;  $T = \mu_B [(B_x g_{xx}^b + B_y g_{yx}^b + B_z g_{zx}^b) - i(B_x g_{xy}^b + B_y g_{yy}^b + B_z g_{zy}^b)]$ ; the asterisk stands for complex conjugate.

Table S22 SOCI energies, in  $\text{cm}^{-1}$ , corresponding to the 16 low-lying spin-orbit states of complex 2, calculated with various approaches.

| State idx   | SO-CASSCF | SO-NEVPT2 | model//SO-NEVPT2 |
|-------------|-----------|-----------|------------------|
| $\psi_1$    | 0.0       | 0.0       | 0.0              |
| $\psi_2$    | 1.9       | 1.9       | 2.1              |
| $\psi_3$    | 3.9       | 3.6       | 3.9              |
| $\psi_4$    | 8.7       | 7.7       | 8.1              |
| $\psi_5$    | 214.6     | 177.0     | 178.7            |
| $\psi_6$    | 215.2     | 177.7     | 179.3            |
| $\psi_7$    | 218.9     | 180.6     | 182.2            |
| $\psi_8$    | 220.2     | 182.2     | 183.7            |
| $\psi_9$    | 238.0     | 206.4     | 206.6            |
| $\psi_{10}$ | 238.3     | 206.9     | 207.1            |
| $\psi_{11}$ | 241.4     | 209.6     | 210.4            |
| $\psi_{12}$ | 243.8     | 212.2     | 212.9            |
| $\psi_{13}$ | 448.8     | 379.7     | 382.3            |
| $\psi_{14}$ | 449.0     | 380.0     | 382.4            |
| $\psi_{15}$ | 457.8     | 388.4     | 390.5            |
| $\psi_{16}$ | 458.2     | 389.0     | 391.2            |

Table S23 Contribution of the  $|S, M_S\rangle$  components of the low-lying  $S = 3, 2, 1, 0$  states to the wavefunctions of the 16 low-energy spin-orbit states, obtained in SO-NEVPT2 calculations on complex 2 in an arbitrary xyz frame.<sup>a</sup>

| SOCI state  | $ 3,3\rangle$ | $ 3,2\rangle$ | $ 3,1\rangle$ | $ 3,0\rangle$ | $ 3,-1\rangle$ | $ 3,-2\rangle$ | $ 3,-3\rangle$ | $ 2,2\rangle$ | $ 2,1\rangle$ | $ 2,0\rangle$ | $ 2,-1\rangle$ | $ 2,-2\rangle$ | $ 1,1\rangle$ | $ 1,0\rangle$ | $ 1,-1\rangle$ | $ 0,0\rangle$ |
|-------------|---------------|---------------|---------------|---------------|----------------|----------------|----------------|---------------|---------------|---------------|----------------|----------------|---------------|---------------|----------------|---------------|
| $\psi_1$    | 0.1           | 0.04          | 0.04          | 0.07          | 0.04           | 0.04           | 0.1            | 0.01          | 0.02          | 0             | 0.02           | 0.01           | 0.02          | 0             | 0.02           | 0             |
| $\psi_2$    | 0.05          | 0.06          | 0.05          | 0.04          | 0.05           | 0.06           | 0.05           | 0.01          | 0             | 0.05          | 0              | 0.01           | 0.03          | 0.06          | 0.03           | 0             |
| $\psi_3$    | 0.07          | 0.02          | 0.02          | 0.01          | 0.02           | 0.02           | 0.07           | 0.02          | 0.01          | 0.02          | 0.01           | 0.02           | 0.07          | 0.04          | 0.07           | 0.02          |
| $\psi_4$    | 0             | 0             | 0.01          | 0.01          | 0.01           | 0              | 0              | 0.09          | 0.02          | 0.01          | 0.02           | 0.09           | 0.01          | 0.06          | 0.01           | 0.17          |
| $\psi_5$    | 0.02          | 0.15          | 0.02          | 0.05          | 0.02           | 0.15           | 0.02           | 0.02          | 0.02          | 0.12          | 0.02           | 0.02           | 0.01          | 0             | 0.01           | 0             |
| $\psi_6$    | 0.06          | 0.01          | 0.1           | 0.05          | 0.1            | 0.01           | 0.06           | 0.02          | 0.08          | 0             | 0.08           | 0.02           | 0             | 0.02          | 0              | 0.02          |
| $\psi_7$    | 0.04          | 0.04          | 0.02          | 0             | 0.02           | 0.04           | 0.04           | 0.02          | 0.08          | 0.04          | 0.08           | 0.02           | 0.09          | 0             | 0.09           | 0.01          |
| $\psi_8$    | 0.01          | 0.01          | 0.02          | 0.03          | 0.02           | 0.01           | 0.01           | 0.1           | 0.04          | 0.01          | 0.04           | 0.1            | 0.03          | 0.14          | 0.03           | 0.05          |
| $\psi_9$    | 0.06          | 0.09          | 0             | 0.06          | 0              | 0.09           | 0.06           | 0.03          | 0.05          | 0.13          | 0.05           | 0.03           | 0             | 0             | 0              | 0             |
| $\psi_{10}$ | 0.06          | 0.05          | 0.07          | 0.01          | 0.07           | 0.05           | 0.06           | 0.02          | 0.09          | 0.08          | 0.09           | 0.02           | 0             | 0.01          | 0              | 0             |
| $\psi_{11}$ | 0.04          | 0.02          | 0.03          | 0             | 0.03           | 0.02           | 0.04           | 0.03          | 0.11          | 0.04          | 0.11           | 0.03           | 0.05          | 0.01          | 0.05           | 0.05          |
| $\psi_{12}$ | 0.01          | 0             | 0.01          | 0.01          | 0.01           | 0              | 0.01           | 0.09          | 0.03          | 0.02          | 0.03           | 0.09           | 0.06          | 0.23          | 0.06           | 0.02          |
| $\psi_{13}$ | 0.05          | 0.02          | 0.27          | 0.02          | 0.27           | 0.02           | 0.05           | 0.03          | 0.02          | 0.01          | 0.02           | 0.03           | 0             | 0             | 0              | 0             |
| $\psi_{14}$ | 0.02          | 0.14          | 0.02          | 0.35          | 0.02           | 0.14           | 0.02           | 0.02          | 0.03          | 0.01          | 0.03           | 0.02           | 0             | 0             | 0              | 0             |
| $\psi_{15}$ | 0.02          | 0.01          | 0.01          | 0             | 0.01           | 0.01           | 0.02           | 0.11          | 0.02          | 0.09          | 0.02           | 0.11           | 0.04          | 0.05          | 0.04           | 0.26          |
| $\psi_{16}$ | 0.01          | 0.01          | 0.01          | 0.01          | 0.01           | 0.01           | 0.01           | 0.04          | 0.03          | 0.02          | 0.03           | 0.04           | 0.27          | 0             | 0.27           | 0.05          |

<sup>a</sup>The corresponding state energies are printed in Table S22.

Table S24 Contribution of the  $|S, M_S\rangle$  components of the low-lying  $S = 3, 2, 1, 0$  states to the wavefunctions of the 16 low-energy spin-orbit states, obtained in SO-NEVPT2 calculations on complex 2 in the molecular PAF.

| SOCI state  | $ 3,3\rangle$ | $ 3,2\rangle$ | $ 3,1\rangle$ | $ 3,0\rangle$ | $ 3,-1\rangle$ | $ 3,-2\rangle$ | $ 3,-3\rangle$ | $ 2,2\rangle$ | $ 2,1\rangle$ | $ 2,0\rangle$ | $ 2,-1\rangle$ | $ 2,-2\rangle$ | $ 1,1\rangle$ | $ 1,0\rangle$ | $ 1,-1\rangle$ | $ 0,0\rangle$ |
|-------------|---------------|---------------|---------------|---------------|----------------|----------------|----------------|---------------|---------------|---------------|----------------|----------------|---------------|---------------|----------------|---------------|
| $\psi_1$    | 0             | 0             | 0             | 0.42          | 0              | 0              | 0              | 0.01          | 0.02          | 0             | 0.02           | 0.01           | 0             | 0.04          | 0              | 0             |
| $\psi_2$    | 0             | 0             | 0.17          | 0             | 0.17           | 0              | 0              | 0.02          | 0.01          | 0.01          | 0.01           | 0.02           | 0.05          | 0             | 0.05           | 0             |
| $\psi_3$    | 0             | 0             | 0.12          | 0             | 0.12           | 0              | 0              | 0.02          | 0.01          | 0.01          | 0.01           | 0.02           | 0.09          | 0             | 0.09           | 0.01          |
| $\psi_4$    | 0             | 0.01          | 0             | 0             | 0              | 0.01           | 0              | 0             | 0             | 0.23          | 0              | 0              | 0.04          | 0             | 0.04           | 0.17          |
| $\psi_5$    | 0.01          | 0.19          | 0.01          | 0.01          | 0.01           | 0.19           | 0.01           | 0.09          | 0             | 0             | 0              | 0.09           | 0             | 0.01          | 0              | 0             |
| $\psi_6$    | 0.02          | 0.16          | 0.02          | 0             | 0.02           | 0.16           | 0.02           | 0.09          | 0.01          | 0             | 0.01           | 0.09           | 0.01          | 0             | 0.01           | 0.02          |
| $\psi_7$    | 0.01          | 0.01          | 0.07          | 0.01          | 0.07           | 0.01           | 0.01           | 0.01          | 0.11          | 0             | 0.11           | 0.01           | 0.08          | 0.04          | 0.08           | 0.01          |
| $\psi_8$    | 0.01          | 0             | 0.03          | 0             | 0.03           | 0              | 0.01           | 0.01          | 0.14          | 0             | 0.14           | 0.01           | 0.09          | 0             | 0.09           | 0.05          |
| $\psi_9$    | 0.02          | 0.12          | 0.03          | 0.02          | 0.03           | 0.12           | 0.02           | 0.14          | 0.01          | 0             | 0.01           | 0.14           | 0             | 0             | 0              | 0             |
| $\psi_{10}$ | 0.02          | 0.11          | 0.03          | 0.02          | 0.03           | 0.11           | 0.02           | 0.13          | 0.02          | 0.01          | 0.02           | 0.13           | 0.01          | 0             | 0.01           | 0             |
| $\psi_{11}$ | 0             | 0.02          | 0.07          | 0             | 0.07           | 0.02           | 0              | 0.04          | 0.11          | 0             | 0.11           | 0.04           | 0.05          | 0.02          | 0.05           | 0.05          |
| $\psi_{12}$ | 0             | 0             | 0.02          | 0             | 0.02           | 0              | 0              | 0             | 0.13          | 0             | 0.13           | 0              | 0.16          | 0.02          | 0.16           | 0.02          |
| $\psi_{13}$ | 0.35          | 0             | 0             | 0             | 0              | 0              | 0.35           | 0.03          | 0.02          | 0             | 0.02           | 0.03           | 0             | 0             | 0              | 0             |
| $\psi_{14}$ | 0.35          | 0             | 0             | 0             | 0              | 0              | 0.35           | 0.03          | 0.02          | 0             | 0.02           | 0.03           | 0             | 0             | 0              | 0             |
| $\psi_{15}$ | 0             | 0.02          | 0.01          | 0.01          | 0.01           | 0.02           | 0              | 0             | 0             | 0.34          | 0              | 0              | 0.01          | 0.1           | 0.01           | 0.26          |
| $\psi_{16}$ | 0             | 0             | 0             | 0.06          | 0              | 0              | 0              | 0.02          | 0.03          | 0.06          | 0.03           | 0.02           | 0.01          | 0.52          | 0.01           | 0.05          |

<sup>a</sup>The corresponding state energies are printed in Table S22.

Table S25 Complex 2: Numerical matrix elements ( $\text{cm}^{-1}$ ) of  $\hat{H}^{\text{MS}} = J\hat{S}_a\hat{S}_b + \hat{S}_a\bar{D}_{aa}\hat{S}_a + \hat{S}_b\bar{D}_{bb}\hat{S}_b$  expressed in the  $|M_{S_a}, M_{S_b}\rangle$  uncoupled-spin basis, obtained with the spin-free NEVPT2  $J = -2.85 \text{ cm}^{-1}$  and the calculated local anisotropy tensors shown in Equation ?? of the main manuscript.

| $\hat{H}^{\text{MS}}$                  | $ \frac{3}{2}, \frac{3}{2}\rangle$ | $ \frac{3}{2}, \frac{1}{2}\rangle$ | $ \frac{1}{2}, \frac{3}{2}\rangle$ | $ \frac{3}{2}, -\frac{1}{2}\rangle$ | $ \frac{1}{2}, \frac{1}{2}\rangle$ | $ \frac{1}{2}, \frac{3}{2}\rangle$ | $ \frac{3}{2}, -\frac{3}{2}\rangle$ | $ \frac{1}{2}, -\frac{1}{2}\rangle$ | $ \frac{1}{2}, -\frac{3}{2}\rangle$ | $ \frac{3}{2}, \frac{3}{2}\rangle$ | $ \frac{1}{2}, -\frac{1}{2}\rangle$ | $ \frac{1}{2}, -\frac{3}{2}\rangle$ | $ \frac{3}{2}, \frac{1}{2}\rangle$ | $ \frac{1}{2}, -\frac{1}{2}\rangle$ | $ \frac{3}{2}, -\frac{1}{2}\rangle$ | $ \frac{1}{2}, -\frac{3}{2}\rangle$ |
|----------------------------------------|------------------------------------|------------------------------------|------------------------------------|-------------------------------------|------------------------------------|------------------------------------|-------------------------------------|-------------------------------------|-------------------------------------|------------------------------------|-------------------------------------|-------------------------------------|------------------------------------|-------------------------------------|-------------------------------------|-------------------------------------|
| $\langle \frac{3}{2}, \frac{3}{2}  $   | 155.9                              | $28.3 + 25.3i$                     | $-27.5 - 24.7i$                    | $45.1 + 10.8i$                      | 0                                  | $-11.9 - 12.5i$                    | 0                                   | 0                                   | 0                                   | 0                                  | 0                                   | 0                                   | 0                                  | 0                                   | 0                                   | 0                                   |
| $\langle \frac{3}{2}, \frac{1}{2}  $   | $28.3 - 25.3i$                     | -6.8                               | $-27.5 - 24.7i$                    | 0                                   | $45.1 + 10.8i$                     | 0                                  | $45.1 + 10.8i$                      | $0 - 11.9 - 12.5i$                  | 0                                   | 0                                  | 0                                   | 0                                   | 0                                  | 0                                   | 0                                   | 0                                   |
| $\langle \frac{1}{2}, \frac{3}{2}  $   | $-27.5 + 24.7i$                    | -4.3                               | $28.3 + 25.3i$                     | 0                                   | $45.1 + 10.8i$                     | 0                                  | $45.1 + 10.8i$                      | $0 - 11.9 - 12.5i$                  | 0                                   | 0                                  | 0                                   | 0                                   | 0                                  | 0                                   | 0                                   | 0                                   |
| $\langle \frac{3}{2}, -\frac{1}{2}  $  | $45.1 - 10.8i$                     | 0                                  | -2.5                               | -4.9                                | $-28.3 - 25.3i$                    | $-27.5 - 24.7i$                    | 0                                   | 0                                   | $0 - 11.9 - 12.5i$                  | 0                                  | 0                                   | 0                                   | 0                                  | 0                                   | 0                                   | 0                                   |
| $\langle \frac{1}{2}, -\frac{3}{2}  $  | $0 - 27.5 + 24.7i$                 | $28.3 - 25.3i$                     | -4.9                               | -163.0                              | -4.9                               | 0                                  | 0                                   | 0                                   | $45.1 + 10.8i$                      | $0 - 11.9 - 12.5i$                 | 0                                   | 0                                   | 0                                  | 0                                   | 0                                   | 0                                   |
| $\langle -\frac{1}{2}, \frac{3}{2}  $  | $-11.9 + 12.5i$                    | 0                                  | 0                                  | -4.9                                | 6.8                                | 0                                  | 0                                   | $28.3 + 25.3i$                      | $27.5 + 24.7i$                      | 0                                  | $45.1 + 10.8i$                      | 0                                   | 0                                  | 0                                   | 0                                   | 0                                   |
| $\langle \frac{3}{2}, -\frac{3}{2}  $  | 0                                  | $45.1 - 10.8i$                     | $0 - 28.3 + 25.3i$                 | 0                                   | 168.7                              | -4.3                               | 0                                   | -27.5 - 24.7i                       | 0                                   | $0 - 11.9 - 12.5i$                 | 0                                   | 0                                   | 0                                  | 0                                   | 0                                   | 0                                   |
| $\langle \frac{1}{2}, -\frac{1}{2}  $  | 0                                  | 0                                  | $45.1 - 10.8i$                     | $-27.5 + 24.7i$                     | 0                                  | -4.3                               | -161.6                              | -5.7                                | $0 - 28.3 - 25.3i$                  | 0                                  | 0                                   | 0                                   | $0 - 11.9 - 12.5i$                 | 0                                   | 0                                   | 0                                   |
| $\langle -\frac{1}{2}, -\frac{3}{2}  $ | $0 - 11.9 + 12.5i$                 | 0                                  | 0                                  | $28.3 - 25.3i$                      | 0                                  | $28.3 - 25.3i$                     | -4.3                                | -161.6                              | 0                                   | 0                                  | $27.5 + 24.7i$                      | $45.1 + 10.8i$                      | 0                                  | 0                                   | 0                                   | 0                                   |
| $\langle -\frac{3}{2}, \frac{3}{2}  $  | 0                                  | $0 - 11.9 + 12.5i$                 | 0                                  | $27.5 - 24.7i$                      | 0                                  | -4.3                               | 168.7                               | 0                                   | $28.3 + 25.3i$                      | 0                                  | $45.1 + 10.8i$                      | 0                                   | 0                                  | 0                                   | 0                                   | 0                                   |
| $\langle \frac{1}{2}, -\frac{3}{2}  $  | 0                                  | 0                                  | 0                                  | $45.1 - 10.8i$                      | $0 - 27.5 + 24.7i$                 | $-28.3 + 25.3i$                    | 0                                   | 0                                   | 6.8                                 | -4.9                               | 0                                   | 0                                   | $0 - 11.9 - 12.5i$                 | 0                                   | 0                                   | 0                                   |
| $\langle -\frac{1}{2}, -\frac{1}{2}  $ | 0                                  | 0                                  | $0 - 11.9 + 12.5i$                 | $45.1 - 10.8i$                      | 0                                  | $45.1 - 10.8i$                     | 0                                   | 0                                   | -4.9                                | -163.0                             | $-4.9 - 28.3 - 25.3i$               | $27.5 + 24.7i$                      | 0                                  | 0                                   | 0                                   | 0                                   |
| $\langle -\frac{3}{2}, \frac{1}{2}  $  | 0                                  | 0                                  | $0 - 11.9 + 12.5i$                 | 0                                   | $0 - 11.9 + 12.5i$                 | 0                                  | 0                                   | $27.5 - 24.7i$                      | $28.3 - 25.3i$                      | 0                                  | -4.9                                | 0                                   | $45.1 + 10.8i$                     | 0                                   | 0                                   | 0                                   |
| $\langle -\frac{1}{2}, -\frac{3}{2}  $ | 0                                  | 0                                  | 0                                  | $45.1 - 10.8i$                      | 0                                  | $45.1 - 10.8i$                     | 0                                   | $0 - 28.3 + 25.3i$                  | 0                                   | 0                                  | 2.5                                 | 0                                   | $27.5 + 24.7i$                     | -4.3                                | $27.5 + 24.7i$                      | 0                                   |
| $\langle -\frac{3}{2}, -\frac{1}{2}  $ | 0                                  | 0                                  | 0                                  | 0                                   | 0                                  | $0 - 11.9 + 12.5i$                 | 0                                   | $45.1 - 10.8i$                      | 0                                   | $45.1 - 10.8i$                     | 0                                   | -4.3                                | $-6.8 - 28.3 - 25.3i$              | -6.8                                | $-28.3 - 25.3i$                     | 0                                   |
| $\langle -\frac{3}{2}, -\frac{3}{2}  $ | 0                                  | 0                                  | 0                                  | 0                                   | 0                                  | 0                                  | 0                                   | 0                                   | $0 - 11.9 + 12.5i$                  | 0                                  | $45.1 - 10.8i$                      | $27.5 - 24.7i$                      | $-28.3 + 25.3i$                    | 155.9                               | 0                                   | 0                                   |

Table S26 Complex 2: Numerical matrix elements ( $\text{cm}^{-1}$ ) of  $\hat{H}^{\text{MS}} = \hat{S}_a \hat{S}_b + \hat{S}_a \hat{D}_a \hat{S}_a + \hat{S}_b \hat{D}_b \hat{S}_b$  expressed in the  $|S, M_S\rangle$  coupled-spin basis, obtained with the spin-free NEVPT2  $J = -2.85 \text{ cm}^{-1}$  and the the calculated local anisotropy tensors shown in Eq. ?? of the main manuscript.

| $\hat{H}^{\text{MS}}$ | $ 3,3\rangle$        | $ 3,2\rangle$           | $ 3,1\rangle$                | $ 3,0\rangle$          | $ 3,-1\rangle$ | $ 3,-2\rangle$ | $ 3,-3\rangle$ | $ 2,2\rangle$           | $ 2,1\rangle$                | $ 2,0\rangle$            | $ 2,-1\rangle$   | $ 2,-2\rangle$ | $ 1,1\rangle$            | $ 1,0\rangle$         | $ 1,-1\rangle$ | $ 0,0\rangle$ |
|-----------------------|----------------------|-------------------------|------------------------------|------------------------|----------------|----------------|----------------|-------------------------|------------------------------|--------------------------|------------------|----------------|--------------------------|-----------------------|----------------|---------------|
| $\langle 3,3 $        | 155.9                | $0.6+0.4i$              | $14.8-0.8i$                  | 0                      | 0              | 0              | 0              | $39.4+35.3i$            | $40.2+16.5i$                 | 0                        | 0                | 0              | $18.2-0.9i$              | 0                     | 0              | 0             |
| $\langle 3,2 $        | $0.6-0.4i$           | -6.4                    | $0.4+0.3i$                   | $21.0-1.1i$            | 0              | 0              | 0              | -4.6                    | 0                            | $40.2+16.5i$             | 0                | 0              | $-0.4-0.2i$              | $10.5-0.5i$           | 0              | 0             |
| $\langle 3,1 $        | $14.8+0.8i$          | $0.4-0.3i$              | -103.8                       | $0.2+0.1i$             | $23.0-1.2i$    | 0              | 0              | $-30.5+27.4i$           | $-2.9-24.9-22.3i$            | $31.2+12.7i$             | 0                | 0              | 79.5                     | $-0.3-0.2i$           | $4.7-0.2i$     | 0             |
| $\langle 3,0 $        | 0                    | $21.0+1.1i$             | $0.2-0.1i$                   | -136.3                 | $-0.2-0.1i$    | $21.0-1.1i$    | 0              | $-18.0+7.4i-35.2+31.6i$ | 0                            | $-35.2-31.6i$            | $18.0+7.4i$      | 0              | $0.2-0.1i$               | 97.4                  | $-0.2-0.1i$    | 0             |
| $\langle 3,-1 $       | 0                    | 0                       | $23.0+1.2i$                  | $-0.2+0.1i$            | -103.8         | $-0.4-0.3i$    | $14.8-0.8i$    | 0                       | $-31.2+12.7i-24.9+22.3i$     | $-2.9-30.5-27.4i$        | $2.9-30.5-27.4i$ | 0              | $4.7+0.2i$               | $0.3-0.2i$            | 79.5           | 0             |
| $\langle 3,-2 $       | 0                    | 0                       | 0                            | $21.0+1.1i$            | $-0.4+0.3i$    | -6.4           | $-0.6-0.4i$    | 0                       | $-40.2+16.5i$                | 0                        | 4.6              | 0              | 0                        | $10.5+0.5i$           | $0.4-0.2i$     | 0             |
| $\langle 3,-3 $       | 0                    | 0                       | 0                            | 0                      | $14.8+0.8i$    | $-0.6+0.4i$    | 155.9          | 0                       | 0                            | $-40.2+16.5i$            | $39.4-35.3i$     | 0              | 0                        | 0                     | $18.2+0.9i$    | 0             |
| $\langle 2,2 $        | $39.4-35.3i$         | $-4.6-30.5-27.4i$       | $-18.0-7.4i$                 | 0                      | 0              | 0              | 0              | 2.1                     | 0                            | 0                        | 0                | 0              | $24.9+22.3i$             | $36.0+14.7i$          | 0              | $23.5-1.2i$   |
| $\langle 2,1 $        | $40.2-16.5i$         | 0                       | $-2.9-35.2-31.6i-31.2-12.7i$ | 0                      | 0              | 0              | 0              | 0                       | 2.1                          | 0                        | 0                | 0              | $-3.6-17.6-15.8i$        | $25.5+10.4i-0.6-0.4i$ | 0              | 0             |
| $\langle 2,0 $        | 0                    | $40.2-16.5i-24.9+22.3i$ | $0-24.9-22.3i-40.2-16.5i$    | 0                      | 0              | 0              | 0              | 0                       | 0                            | 2.1                      | 0                | 0              | $-30.5+27.4i$            | 0                     | $-30.5-27.4i$  | 162.3         |
| $\langle 2,-1 $       | 0                    | 0                       | $31.2-12.7i-35.2+31.6i$      | 2.9                    | 0              | $-40.2-16.5i$  | 0              | 0                       | 0                            | 0                        | 2.1              | 0              | $-25.5+10.4i-17.6+15.8i$ | $0-30.5-27.4i$        | $3.6-0.6-0.4i$ | 0             |
| $\langle 2,-2 $       | 0                    | 0                       | 0                            | $18.0-7.4i-30.5+27.4i$ | $4.7-0.2i$     | 4.6            | $39.4+35.3i$   | 0                       | 0                            | 0                        | 0                | 2.1            | 0                        | $-36.0+14.7i$         | $24.9-22.3i$   | $23.5+1.2i$   |
| $\langle 1,1 $        | $18.2+0.9i-0.4+0.2i$ | $-0.4+0.2i$             | 79.5                         | $0.2+0.1i$             | $4.7-0.2i$     | 0              | 0              | $24.9-22.3i$            | $-3.6-30.5-27.4i-25.5-10.4i$ | 0                        | 0                | 0              | -57.1                    | $-0.4-0.3i$           | $-23.0+1.2i$   | 0             |
| $\langle 1,0 $        | 0                    | $10.5+0.5i$             | $-0.3+0.2i$                  | 97.4                   | $0.3+0.2i$     | $10.5-0.5i$    | 0              | $36.0-14.7i-17.6+15.8i$ | 0                            | $-17.6-15.8i-36.0-14.7i$ | $-0.4+0.3i$      | 0              | $-0.4+0.3i$              | 137.7                 | $0.4+0.3i$     | 0             |
| $\langle 1,-1 $       | 0                    | 0                       | $4.7+0.2i$                   | $-0.2+0.1i$            | 79.5           | $0.4+0.2i$     | $18.2-0.9i$    | 0                       | $25.5-10.4i-30.5+27.4i$      | $-23.0-1.2i$             | $3.6-24.9+22.3i$ | $-23.0-1.2i$   | $0.4-0.3i$               | $0.4-0.3i$            | -57.1          | 0             |
| $\langle 0,0 $        | 0                    | 0                       | 0                            | 0                      | 0              | 0              | 0              | $23.5+1.2i$             | $-0.6+0.4i$                  | 162.3                    | $0.6+0.4i$       | $23.5-1.2i$    | 0                        | 0                     | 0              | 10.7          |



Table S27 Complex 2: Matrix elements, in  $\text{cm}^{-1}$ , of  $\hat{H}^{\text{eff}}$  expressed in the  $|S, M_S\rangle$  coupled-spin basis, obtained from a SO-NEVPT2 calculation on complex 2 in the molecular PAF.

| $\hat{H}^{\text{MS}}$ | $ 3,3\rangle$ | $ 3,2\rangle$ | $ 3,1\rangle$ | $ 3,0\rangle$ | $ 3,-1\rangle$ | $ 3,-2\rangle$ | $ 3,-3\rangle$ | $ 2,2\rangle$ | $ 2,1\rangle$ | $ 2,0\rangle$ | $ 2,-1\rangle$ | $ 2,-2\rangle$ | $ 1,1\rangle$ | $ 1,0\rangle$ | $ 1,-1\rangle$ | $ 0,0\rangle$ |
|-----------------------|---------------|---------------|---------------|---------------|----------------|----------------|----------------|---------------|---------------|---------------|----------------|----------------|---------------|---------------|----------------|---------------|
| $\langle 3,3 $        | 156.3         | 0.2-0.3i      | 14.3+0.1i     | 0.2i          | 0              | 0              | 0              | 38.0+35.9i    | 39.9+15.7i    | 0.1           | -0.1i          | 0              | 18.5-1.4i     | -0.1i         | -0.1i          | 0.1           |
| $\langle 3,2 $        | 0.2+0.3i      | -5.4          | 0.1-0.1i      | 20.5-0.4i     | 0.1i           | 0              | 0              | -5.9+0.3i     | 0.4           | 39.8+15.7i    | -0.1           | 0              | 0.1i          | 10.5-0.6i     | 0              | 0             |
| $\langle 3,1 $        | 14.3-0.1i     | 0.1+0.1i      | -102.2        | 0             | 22.5-0.5i      | -0.1i          | 0              | -30.2+27.6i   | -3.6+0.1i     | -24.8-22.7i   | 30.9+12.2i     | -0.1           | 79.3          | -0.1+0.1i     | 4.7-0.2i       | 0.2           |
| $\langle 3,0 $        | -0.2i         | 20.5+0.4i     | 0             | -134.4        | 0              | 20.5-0.4i      | -0.2i          | -17.9+7.1i    | -34.9+32.0i   | -0.1i         | -34.9-32.0i    | 17.9+7.1i      | 0.1           | 97.1          | -0.1           | 0             |
| $\langle 3,-1 $       | 0             | -0.1i         | 22.5+0.5i     | 0             | -102.2         | -0.1+0.1i      | 14.3+0.1i      | -0.1          | -30.9+12.2i   | -24.8+22.7i   | 3.6+0.1i       | -30.2-27.6i    | 4.7+0.2i      | 0.1+0.1i      | 79.3           | -0.2          |
| $\langle 3,-2 $       | 0             | 0             | 0.1i          | 20.5+0.4i     | -0.1-0.1i      | -5.4           | -0.2+0.3i      | 0             | -0.1          | -39.9+15.7i   | 0.4            | 5.9+0.3i       | 0             | 10.5+0.6i     | 0.1i           | 0             |
| $\langle 3,-3 $       | 0             | 0             | 0             | 0.2i          | 14.3-0.1i      | -0.2-0.3i      | 156.3          | 0             | -0.1i         | 0.1           | -39.9+15.7i    | 38.0-35.9i     | 0.1i          | -0.1i         | 18.5+1.4i      | 0.1           |
| $\langle 2,2 $        | 38.0-35.9i    | -5.9-0.3i     | -30.2-27.6i   | -17.9-7.1i    | -0.1           | 0              | 0              | 1.9           | 0.1           | 0.2-0.3i      | 0.1i           | 0.1+0.1i       | 24.3+22.5i    | 35.8+14.1i    | 0              | 23.4-1.3i     |
| $\langle 2,1 $        | 39.9-15.7i    | 0.4           | -3.6-0.1i     | -34.9-32.0i   | -30.9-12.2i    | -0.1           | 0.1i           | 0.1           | 2.2           | -0.2+0.1i     | 0.2-0.3i       | -0.1i          | -4.1          | -17.5-16.1i   | 25.3+10.0i     | -0.8+0.2i     |
| $\langle 2,0 $        | 0.1           | 39.8-15.7i    | -24.8+22.7i   | 0.1i          | -24.8-22.7i    | -39.9-15.7i    | 0.1            | 0.2+0.3i      | -0.2-0.1i     | 2.3           | 0.2-0.1i       | 0.2-0.3i       | 0.2-0.3i      | -30.3+27.8i   | 0              | -30.3-27.8i   |
| $\langle 2,-1 $       | 0.1i          | -0.1          | 30.9-12.2i    | -34.9+32.0i   | 3.6-0.1i       | 0.4            | -39.9-15.7i    | -0.1i         | 0.2+0.3i      | -0.2-0.1i     | 2.2            | -0.1           | -25.3+10.0i   | -17.5+16.1i   | 4.1            | 0.8+0.2i      |
| $\langle 2,-2 $       | 0             | 0             | -0.1          | 17.9-7.1i     | -30.2+27.6i    | 5.9-0.3i       | 38.0+35.9i     | 0.1-0.1i      | 0.1i          | -0.2-0.3i     | -0.1           | 1.9            | 0             | -35.8+14.1i   | 24.3-22.5i     | 23.4+1.3i     |
| $\langle 1,1 $        | 18.5+1.4i     | -0.1i         | 79.3          | 0.1           | 4.7-0.2i       | 0              | -0.1i          | 24.3-22.5i    | -4.1          | -30.3-27.8i   | -25.3-10.0i    | 0              | -58.4         | -0.8+0.2i     | -22.9+1.2i     | 0.1           |
| $\langle 1,0 $        | 0.1i          | 10.5+0.6i     | -0.1-0.1i     | 97.1          | 0.1-0.1i       | 10.5-0.6i      | 0.1i           | 35.8-14.1i    | -17.5+16.1i   | 0             | -17.5-16.1i    | -35.8-14.1i    | -0.8-0.2i     | 135.3         | 0.8-0.2i       | 0             |
| $\langle 1,-1 $       | 0.1i          | 0             | 4.7+0.2i      | -0.1          | 79.3           | -0.1i          | 18.5-1.4i      | 0             | 25.3-10.0i    | -30.3+27.8i   | 4.1            | 24.3+22.5i     | -22.9-1.2i    | 0.8+0.2i      | -58.4          | -0.1          |
| $\langle 0,0 $        | 0.1           | 0             | 0.2           | 0             | 0.2            | 0              | 0.1            | 23.4+1.3i     | -0.8-0.2i     | 161.5         | 0.8-0.2i       | 23.4-1.3i      | -0.1          | 0             | -0.1           | 8.0           |

Table S28 Complex 2: Matrix elements, in  $\text{cm}^{-1}$ , of  $\hat{H}^{\text{eff}}$  (Table S27) expressed in the uncoupled-spin basis,  $|M_{S\alpha}, M_{S\beta}\rangle$ .

| $\hat{H}^{\text{MS}}$                 | $ \frac{3}{2}, \frac{3}{2}\rangle$ | $ \frac{3}{2}, \frac{1}{2}\rangle$ | $ \frac{3}{2}, -\frac{1}{2}\rangle$ | $ \frac{3}{2}, -\frac{3}{2}\rangle$ | $ \frac{1}{2}, \frac{3}{2}\rangle$ | $ \frac{1}{2}, \frac{1}{2}\rangle$ | $ \frac{1}{2}, -\frac{1}{2}\rangle$ | $ \frac{1}{2}, -\frac{3}{2}\rangle$ | $ \frac{1}{2}, -\frac{5}{2}\rangle$ | $ \frac{1}{2}, -\frac{7}{2}\rangle$ | $ \frac{1}{2}, -\frac{9}{2}\rangle$ | $ \frac{1}{2}, -\frac{11}{2}\rangle$ | $ \frac{1}{2}, -\frac{13}{2}\rangle$ | $ \frac{1}{2}, -\frac{15}{2}\rangle$ | $ \frac{1}{2}, -\frac{17}{2}\rangle$ | $ \frac{1}{2}, -\frac{19}{2}\rangle$ |
|---------------------------------------|------------------------------------|------------------------------------|-------------------------------------|-------------------------------------|------------------------------------|------------------------------------|-------------------------------------|-------------------------------------|-------------------------------------|-------------------------------------|-------------------------------------|--------------------------------------|--------------------------------------|--------------------------------------|--------------------------------------|--------------------------------------|
| $\langle \frac{3}{2}, \frac{3}{2} $   | 156.3                              | 27.0+25.2i                         | -26.7-25.6i                         | 44.8+10.4i                          | -0.6+0.9i                          | -11.7-11.8i                        | 0.1                                 | 0.1i                                | 0.2i                                | -0.1i                               | -0.1i                               | 0                                    | 0                                    | 0                                    | 0                                    | 0                                    |
| $\langle \frac{3}{2}, \frac{1}{2} $   | 27.0-25.2i                         | -7.6                               | -3.6-0.3i                           | 0.1                                 | -27.4-25.3i                        | -0.4                               | 44.8+10.2i                          | -0.2+0.2i                           | -11.9-11.6i                         | -0.1+0.2i                           | -0.1+0.1i                           | 0                                    | 0                                    | 0.1                                  | 0                                    | 0                                    |
| $\langle \frac{3}{2}, -\frac{1}{2} $  | -26.7+25.6i                        | -3.6+0.3i                          | 4.1                                 | 0.3                                 | 27.5+25.0i                         | 0                                  | -0.2+0.2i                           | 44.5+10.7i                          | -0.1+0.3i                           | -11.7-12.1i                         | 0                                   | 0                                    | 0.1+0.1i                             | -0.1i                                | 0.1                                  | 0                                    |
| $\langle \frac{3}{2}, -\frac{3}{2} $  | 44.8-10.4i                         | 0.1                                | 0.3                                 | -3.5                                | -4.1-0.1i                          | -0.2                               | -28.3-25.2i                         | -27.4-25.4i                         | 0.1+0.1i                            | 0.1+0.1i                            | 0                                   | 0                                    | -11.8-11.8i                          | -0.1+0.3i                            | -0.1+0.1i                            | 0                                    |
| $\langle \frac{1}{2}, \frac{1}{2} $   | -0.6-0.9i                          | -27.4+25.3i                        | 27.5-25.0i                          | -4.1+0.1i                           | -162.4                             | -3.8-0.1i                          | 7.4                                 | -0.2                                | -0.1                                | 0.3                                 | 44.6+10.5i                          | -0.2+0.4i                            | -11.8-11.8i                          | 0                                    | 0                                    | 0                                    |
| $\langle -\frac{1}{2}, \frac{3}{2} $  | -11.7+11.8i                        | -0.4                               | 0                                   | -0.2                                | -3.8+0.1i                          | -162.4                             | -3.8-0.1i                           | 0.3                                 | -0.2                                | -0.1                                | 0.3                                 | 44.6+10.5i                           | -0.2+0.4i                            | -11.8-11.8i                          | 0                                    | 0                                    |
| $\langle \frac{1}{2}, -\frac{3}{2} $  | 0.1                                | 44.8-10.2i                         | -0.2-0.2i                           | -28.4+25.2i                         | 0.4                                | 0                                  | 166.6                               | -3.0                                | -0.2                                | -0.2                                | 0                                   | -27.0-25.5i                          | -0.2                                 | 0                                    | -11.7-12.0i                          | 0.2i                                 |
| $\langle \frac{1}{2}, -\frac{1}{2} $  | -0.1i                              | -0.2-0.2i                          | 44.5-10.7i                          | -27.3+25.4i                         | -0.3+0.1i                          | -0.1                               | -3.0                                | -161.0                              | -4.7+0.1i                           | -0.2-28.0-25.2i                     | 0                                   | 0                                    | -0.1+0.3i                            | -11.9-11.6i                          | -0.2i                                | -0.2i                                |
| $\langle -\frac{1}{2}, \frac{1}{2} $  | -0.2i                              | -11.9+11.6i                        | -0.1-0.3i                           | 0                                   | 0                                  | 28.0-25.2i                         | -0.2                                | -4.7-0.1i                           | -161.0                              | -3.0                                | 0.1                                 | 0.3+0.1i                             | 27.3+25.4i                           | 44.5+10.7i                           | -0.2+0.2i                            | -0.1i                                |
| $\langle -\frac{1}{2}, -\frac{3}{2} $ | -0.1                               | -0.2i                              | -11.7+12.0i                         | 0                                   | 0.2                                | 27.0-25.5i                         | 0                                   | -0.2                                | -3.0                                | 166.6                               | 0                                   | -0.4                                 | 28.4+25.2i                           | -0.2+0.2i                            | 44.8+10.2i                           | -0.1                                 |
| $\langle \frac{1}{2}, -\frac{5}{2} $  | 0.1i                               | -0.1-0.1i                          | 0                                   | 0                                   | 44.6-10.5i                         | -0.2-0.2i                          | -27.2+25.5i                         | -28.1+25.2i                         | 0.2                                 | 0.2                                 | 7.4                                 | -3.8-0.1i                            | -0.2                                 | 0                                    | 0.4                                  | -11.7-11.8i                          |
| $\langle -\frac{1}{2}, -\frac{1}{2} $ | 0                                  | 0                                  | -0.1-0.1i                           | -0.1-0.3i                           | -11.8+11.8i                        | -0.2-0.4i                          | 44.6-10.5i                          | -0.4                                | 0.2                                 | 0.1                                 | -0.2                                | -3.8+0.1i                            | -162.4                               | -4.1-0.1i                            | -27.5-25.0i                          | 27.4+25.3i                           |
| $\langle -\frac{1}{2}, -\frac{3}{2} $ | 0                                  | 0                                  | 0.1-0.1i                            | -0.1-0.3i                           | -11.8+11.8i                        | 0                                  | 0.1i                                | 0.2+0.1i                            | 27.1-25.4i                          | 28.3-25.2i                          | -0.2                                | -4.1+0.1i                            | -0.3                                 | -0.3                                 | -0.1                                 | 44.8+10.4i                           |
| $\langle -\frac{1}{2}, -\frac{5}{2} $ | 0                                  | 0.1                                | 0.1i                                | -0.1+0.1i                           | 0                                  | 0                                  | -11.8+11.8i                         | -0.2-0.5i                           | 44.6-10.5i                          | 0                                   | 0                                   | -27.5+25.0i                          | -0.3                                 | 4.1                                  | -3.6-0.3i                            | 26.7+25.6i                           |
| $\langle -\frac{3}{2}, -\frac{1}{2} $ | 0                                  | 0                                  | 0.1                                 | 0                                   | 0                                  | 0.1+0.1i                           | 0.1                                 | -11.8+11.8i                         | -0.3-0.4i                           | 44.7-10.4i                          | 0.4                                 | 27.4-25.3i                           | -0.1                                 | -3.6+0.3i                            | -7.6-27.0-25.2i                      | -0.1                                 |
| $\langle -\frac{3}{2}, -\frac{3}{2} $ | 0                                  | 0                                  | 0                                   | 0                                   | 0                                  | 0                                  | 0.1                                 | 0.1                                 | 0.2i                                | 0.1i                                | -0.1+11.7+11.8i                     | -0.6-0.9i                            | 44.8-10.4i                           | 26.7-25.6i                           | -27.0+25.2i                          | 156.3                                |

Table S29 Complex 2: Matrix elements of  $\hat{H}^{\text{MS}} - \hat{H}^{\text{eff}}$  (cm $^{-1}$ ) expressed in the  $|M_{S_a}, M_{S_b}\rangle$  uncoupled-spin basis.  $\hat{H}^{\text{MS}} = J\hat{S}_a\hat{S}_b + \hat{S}_a\bar{D}_a\hat{S}_a + \hat{S}_b\bar{D}_b\hat{S}_b$  and  $\hat{H}^{\text{eff}}$  are taken from Tables S25 and S28 respectively.

| Diff.                                | $ \frac{3}{2}, \frac{3}{2}\rangle$ | $ \frac{3}{2}, \frac{1}{2}\rangle$ | $ \frac{3}{2}, -\frac{1}{2}\rangle$ | $ \frac{3}{2}, -\frac{3}{2}\rangle$ | $ \frac{1}{2}, \frac{1}{2}\rangle$ | $ \frac{1}{2}, -\frac{1}{2}\rangle$ | $ \frac{1}{2}, \frac{1}{2}\rangle$ | $ \frac{1}{2}, -\frac{1}{2}\rangle$ | $ \frac{3}{2}, \frac{3}{2}\rangle$ | $ \frac{3}{2}, \frac{1}{2}\rangle$ | $ \frac{3}{2}, -\frac{1}{2}\rangle$ | $ \frac{3}{2}, -\frac{3}{2}\rangle$ | $ \frac{1}{2}, \frac{1}{2}\rangle$ | $ \frac{1}{2}, -\frac{1}{2}\rangle$ | $ \frac{3}{2}, \frac{3}{2}\rangle$ | $ \frac{3}{2}, \frac{1}{2}\rangle$ | $ \frac{3}{2}, -\frac{1}{2}\rangle$ | $ \frac{3}{2}, -\frac{3}{2}\rangle$ |
|--------------------------------------|------------------------------------|------------------------------------|-------------------------------------|-------------------------------------|------------------------------------|-------------------------------------|------------------------------------|-------------------------------------|------------------------------------|------------------------------------|-------------------------------------|-------------------------------------|------------------------------------|-------------------------------------|------------------------------------|------------------------------------|-------------------------------------|-------------------------------------|
| $\langle\frac{3}{2}, \frac{3}{2} $   | 0.4                                | -1.3                               | -0.1 <i>i</i>                       | 0.8-0.9 <i>i</i>                    | -0.3-0.4 <i>i</i>                  | -0.6+0.9 <i>i</i>                   | 0.2+0.7 <i>i</i>                   | 0.1                                 | 0.1 <i>i</i>                       | 0.2 <i>i</i>                       | -0.1                                | -0.1 <i>i</i>                       | 0                                  | 0                                   | 0                                  | 0                                  | 0                                   | 0                                   |
| $\langle\frac{3}{2}, \frac{1}{2} $   | -1.3                               | 0.1 <i>i</i>                       | -0.8                                | 0.6-0.3 <i>i</i>                    | 0.1                                | 0.1-0.6 <i>i</i>                    | -0.4-0.3-0.6 <i>i</i>              | -0.2+0.2 <i>i</i>                   | -0.1+0.9 <i>i</i>                  | -0.1+0.1 <i>i</i>                  | 0                                   | 0                                   | 0                                  | 0.1                                 | 0                                  | 0                                  | 0                                   | 0                                   |
| $\langle\frac{3}{2}, -\frac{1}{2} $  | 0.8+0.9 <i>i</i>                   | 0.6+0.3 <i>i</i>                   | 1.6                                 | 0.3-0.8-0.2 <i>i</i>                | 0                                  | 0.3-0.8-0.2 <i>i</i>                | 0                                  | -0.2+0.2 <i>i</i>                   | -0.5-0.1 <i>i</i>                  | 0.3 <i>i</i>                       | 0.2+0.4 <i>i</i>                    | 0                                   | 0                                  | 0.1+0.1 <i>i</i>                    | -0.1 <i>i</i>                      | 0.1                                | 0                                   | 0                                   |
| $\langle\frac{3}{2}, -\frac{3}{2} $  | -0.3+0.4 <i>i</i>                  | 0.1                                | 0.3                                 | -1.0                                | 0.8-0.1 <i>i</i>                   | -0.2                                | 0.1 <i>i</i>                       | 0.1-0.7 <i>i</i>                    | 0.1+0.1 <i>i</i>                   | 0                                  | 0                                   | 0.6 <i>i</i>                        | -0.1+0.3 <i>i</i>                  | -0.1-0.1 <i>i</i>                   | 0                                  | 0                                  | 0                                   | 0                                   |
| $\langle\frac{1}{2}, \frac{1}{2} $   | -0.6-0.9 <i>i</i>                  | 0.1+0.6 <i>i</i>                   | -0.8+0.2 <i>i</i>                   | 0.8+0.1 <i>i</i>                    | 0.7                                | 1.1-0.1 <i>i</i>                    | 0.3                                | -0.2                                | -0.1                               | 0.3-0.5-0.2 <i>i</i>               | -0.2+0.4 <i>i</i>                   | 0.6 <i>i</i>                        | 0                                  | 0                                   | 0.6 <i>i</i>                       | 0                                  | 0                                   | 0                                   |
| $\langle\frac{1}{2}, -\frac{1}{2} $  | 0.2-0.7 <i>i</i>                   | -0.4                               | 0                                   | -0.2                                | 1.1+0.1 <i>i</i>                   | 0.4                                 | 0.6                                | 0.1-0.2-0.1 <i>i</i>                | -0.2                               | -0.5+0.8 <i>i</i>                  | -0.2+0.2 <i>i</i>                   | -0.5-0.2 <i>i</i>                   | 0                                  | 0                                   | 0.1-0.1 <i>i</i>                   | -0.1 <i>i</i>                      | -0.1 <i>i</i>                       | -0.1 <i>i</i>                       |
| $\langle\frac{3}{2}, -\frac{3}{2} $  | 0.1                                | -0.3+0.6 <i>i</i>                  | -0.2-0.2 <i>i</i>                   | -0.1-0.1 <i>i</i>                   | 0.4                                | 0                                   | -2.1                               | 1.3                                 | -0.2                               | 0                                  | 0.4-0.8 <i>i</i>                    | -0.2                                | 0                                  | 0.2+0.4 <i>i</i>                    | 0.2 <i>i</i>                       | 0.1                                | 0                                   | 0.1                                 |
| $\langle\frac{1}{2}, -\frac{1}{2} $  | -0.1 <i>i</i>                      | -0.2-0.2 <i>i</i>                  | -0.5+0.1 <i>i</i>                   | 0.1+0.7 <i>i</i>                    | -0.3+0.1 <i>i</i>                  | -0.1                                | 1.3                                | 0.6                                 | 1.0+0.1 <i>i</i>                   | -0.2                               | 0.2                                 | 0                                   | 0                                  | -0.1+0.3 <i>i</i>                   | -0.1+0.9 <i>i</i>                  | -0.2 <i>i</i>                      | -0.2 <i>i</i>                       | -0.2 <i>i</i>                       |
| $\langle-\frac{1}{2}, \frac{3}{2} $  | -0.2 <i>i</i>                      | -0.1-0.9 <i>i</i>                  | -0.1-0.3 <i>i</i>                   | 0                                   | 0                                  | -0.2                                | -0.2                               | 1.0-0.1 <i>i</i>                    | 0.6                                | 1.3                                | -2.1                                | 0                                   | 0                                  | 0.3+0.1 <i>i</i>                    | -0.1+0.7 <i>i</i>                  | -0.5-0.1 <i>i</i>                  | -0.2+0.2 <i>i</i>                   | -0.1 <i>i</i>                       |
| $\langle-\frac{1}{2}, \frac{1}{2} $  | -0.1                               | -0.2 <i>i</i>                      | 0.2-0.4 <i>i</i>                    | 0                                   | 0.2                                | -0.4-0.8 <i>i</i>                   | 0                                  | -0.2                                | 1.3                                | -2.1                               | 0                                   | -0.4                                | 0.1-0.1 <i>i</i>                   | -0.2+0.2 <i>i</i>                   | -0.3-0.6 <i>i</i>                  | -0.1                               | 0.4                                 | 0.2+0.7 <i>i</i>                    |
| $\langle-\frac{1}{2}, -\frac{1}{2} $ | 0.1 <i>i</i>                       | -0.1-0.1 <i>i</i>                  | 0                                   | 0                                   | 0.1 <i>i</i>                       | 0.1                                 | 0.1                                | 0.2 <i>i</i>                        | 0.1 <i>i</i>                       | 0.2 <i>i</i>                       | 0.6                                 | 1.1-0.1 <i>i</i>                    | -0.2                               | 0                                   | 0.4                                | 0.2+0.7 <i>i</i>                   | 0.4                                 | 0.2+0.7 <i>i</i>                    |
| $\langle-\frac{3}{2}, \frac{3}{2} $  | 0                                  | 0                                  | -0.6 <i>i</i>                       | -0.2-0.4 <i>i</i>                   | -0.5+0.2 <i>i</i>                  | -0.4                                | 0.1 <i>i</i>                       | 0.2+0.1 <i>i</i>                    | -0.4-0.7 <i>i</i>                  | 0                                  | -0.2                                | 1.1+0.1 <i>i</i>                    | 0.7                                | 0.8-0.1 <i>i</i>                    | 0.8+0.2 <i>i</i>                   | -0.1+0.6 <i>i</i>                  | -0.6+0.9 <i>i</i>                   | -0.6+0.9 <i>i</i>                   |
| $\langle-\frac{3}{2}, \frac{1}{2} $  | 0                                  | 0.1                                | 0.1-0.1 <i>i</i>                    | -0.1-0.3 <i>i</i>                   | -0.6 <i>i</i>                      | 0                                   | 0.1 <i>i</i>                       | 0.2+0.1 <i>i</i>                    | -0.4-0.7 <i>i</i>                  | 0                                  | -0.2                                | 0.8+0.1 <i>i</i>                    | -1.0                               | -0.3                                | -0.1                               | -0.3-0.4 <i>i</i>                  | -0.3-0.4 <i>i</i>                   | -0.3-0.4 <i>i</i>                   |
| $\langle-\frac{3}{2}, -\frac{1}{2} $ | 0                                  | 0.1                                | 0.1 <i>i</i>                        | -0.1+0.1 <i>i</i>                   | 0                                  | 0                                   | 0.1-0.6 <i>i</i>                   | -0.2-0.5 <i>i</i>                   | -0.4+0.3 <i>i</i>                  | 0                                  | 0                                   | 0.8-0.2 <i>i</i>                    | -0.3                               | 1.6                                 | 0.6-0.3 <i>i</i>                   | -0.8+0.9 <i>i</i>                  | -0.8+0.9 <i>i</i>                   | -0.8+0.9 <i>i</i>                   |
| $\langle-\frac{3}{2}, -\frac{3}{2} $ | 0                                  | 0                                  | 0.1                                 | 0                                   | 0.1+0.1 <i>i</i>                   | 0                                   | 0.1                                | -0.6 <i>i</i>                       | -0.3-0.4 <i>i</i>                  | -0.4+0.4 <i>i</i>                  | 0.4                                 | -0.1-0.6 <i>i</i>                   | -0.1                               | 0.6+0.3 <i>i</i>                    | -0.8                               | 1.3+0.1 <i>i</i>                   | 1.3+0.1 <i>i</i>                    | 1.3+0.1 <i>i</i>                    |
| $\langle-\frac{3}{2}, -\frac{3}{2} $ | 0                                  | 0                                  | 0                                   | 0                                   | 0                                  | 0                                   | 0.1 <i>i</i>                       | 0.1                                 | 0.2 <i>i</i>                       | 0.1 <i>i</i>                       | -0.1                                | 0.2-0.7 <i>i</i>                    | -0.6-0.9 <i>i</i>                  | -0.3+0.4 <i>i</i>                   | -0.8-0.9 <i>i</i>                  | 1.3-0.1 <i>i</i>                   | 1.3-0.1 <i>i</i>                    | 1.3-0.1 <i>i</i>                    |

Table S30 Complex 2: Matrix elements of  $\hat{H}^{\text{MS}} - \hat{H}^{\text{eff}}$  (cm $^{-1}$ ) expressed in the  $|S, M_S\rangle$  coupled-spin basis.  $\hat{H}^{\text{MS}} = J\hat{S}_a\hat{S}_b + \hat{S}_a\bar{D}_a\hat{S}_a + \hat{S}_b\bar{D}_b\hat{S}_b$  and  $\hat{H}^{\text{eff}}$  are taken from Tables S26 and S27 respectively.

| Diff.           | $ 3,3\rangle$     | $ 3,2\rangle$         | $ 3,1\rangle$         | $ 3,0\rangle$         | $ 3,-1\rangle$        | $ 3,-2\rangle$    | $ 3,-3\rangle$        | $ 2,2\rangle$     | $ 2,1\rangle$        | $ 2,0\rangle$     | $ 2,-1\rangle$       | $ 2,-2\rangle$        | $ 1,1\rangle$     | $ 1,0\rangle$     | $ 1,-1\rangle$    | $ 0,0\rangle$     |
|-----------------|-------------------|-----------------------|-----------------------|-----------------------|-----------------------|-------------------|-----------------------|-------------------|----------------------|-------------------|----------------------|-----------------------|-------------------|-------------------|-------------------|-------------------|
| $\langle 3,3 $  | 0.4               | -0.4                  | -0.6 <i>i</i>         | -0.5+0.8 <i>i</i>     | 0.2 <i>i</i>          | 0                 | 0                     | -1.4+0.6 <i>i</i> | -0.3-0.7 <i>i</i>    | 0.1               | -0.1 <i>i</i>        | 0                     | 0.3-0.4 <i>i</i>  | -0.1 <i>i</i>     | -0.1 <i>i</i>     | 0.1               |
| $\langle 3,2 $  | -0.4+0.6 <i>i</i> | 1.1                   | -0.4-0.4 <i>i</i>     | -0.5+0.7 <i>i</i>     | 0.1 <i>i</i>          | 0                 | 0                     | -1.2+0.3 <i>i</i> | 0.4-0.4-0.7 <i>i</i> | -0.1              | -0.1                 | 0                     | 0.3+0.4 <i>i</i>  | -0.1 <i>i</i>     | 0                 | 0                 |
| $\langle 3,1 $  | -0.5-0.8 <i>i</i> | -0.4+0.4 <i>i</i>     | 1.6                   | -0.2-0.1 <i>i</i>     | -0.5+0.6 <i>i</i>     | -0.1 <i>i</i>     | 0                     | 0.3+0.2 <i>i</i>  | -0.7+0.1 <i>i</i>    | 0.1-0.3 <i>i</i>  | -0.3-0.5 <i>i</i>    | -0.1                  | -0.2              | 0.2+0.3 <i>i</i>  | 0                 | 0.2               |
| $\langle 3,0 $  | -0.2 <i>i</i>     | -0.5-0.7 <i>i</i>     | -0.2+0.1 <i>i</i>     | 1.9                   | 0.2+0.1 <i>i</i>      | -0.5+0.7 <i>i</i> | -0.2 <i>i</i>         | 0.1-0.2 <i>i</i>  | 0.3+0.4 <i>i</i>     | -0.1 <i>i</i>     | 0.3-0.4 <i>i</i>     | -0.1-0.2 <i>i</i>     | -0.1+0.1 <i>i</i> | -0.3              | 0.1+0.1 <i>i</i>  | 0                 |
| $\langle 3,-1 $ | 0                 | -0.1 <i>i</i>         | -0.5-0.6 <i>i</i>     | 0.2-0.1 <i>i</i>      | 1.6                   | 0.4+0.4 <i>i</i>  | -0.5+0.8 <i>i</i>     | -0.1              | 0.3-0.5 <i>i</i>     | 0.1+0.3 <i>i</i>  | 0.7+0.1 <i>i</i>     | 0.3-0.2 <i>i</i>      | 0                 | -0.2+0.3 <i>i</i> | -0.2              | -0.2              |
| $\langle 3,-2 $ | 0                 | 0                     | 0.1 <i>i</i>          | -0.5-0.7 <i>i</i>     | 0.4-0.4 <i>i</i>      | 1.1               | 0.4+0.6 <i>i</i>      | 0                 | -0.1                 | 0.4-0.7 <i>i</i>  | 0.4                  | 1.2+0.3 <i>i</i>      | 0                 | 0.1 <i>i</i>      | -0.3+0.4 <i>i</i> | 0                 |
| $\langle 3,-3 $ | 0                 | 0                     | 0                     | 0.2 <i>i</i>          | -0.5-0.8 <i>i</i>     | 0.4-0.6 <i>i</i>  | 0.4                   | 0                 | -0.1 <i>i</i>        | 0.1               | 0.3-0.7 <i>i</i>     | -1.4-0.6 <i>i</i>     | 0.1 <i>i</i>      | -0.1 <i>i</i>     | 0.3+0.4 <i>i</i>  | 0.1               |
| $\langle 2,2 $  | -1.4-0.6 <i>i</i> | -1.2-0.3 <i>i</i>     | 0.3-0.2 <i>i</i>      | 0.1+0.2 <i>i</i>      | -0.1                  | 0                 | 0                     | -0.2              | 0.1                  | 0.2-0.3 <i>i</i>  | 0.1 <i>i</i>         | 0.1+0.1 <i>i</i>      | -0.7+0.1 <i>i</i> | -0.2-0.6 <i>i</i> | 0                 | -0.1-0.1 <i>i</i> |
| $\langle 2,1 $  | -0.3+0.7 <i>i</i> | 0.4-0.7-0.1 <i>i</i>  | 0.3-0.4 <i>i</i>      | 0.3+0.5 <i>i</i>      | -0.1                  | 0.1               | 0.1                   | 0.1               | 0.1-0.2+0.1 <i>i</i> | 0.2-0.3 <i>i</i>  | -0.1 <i>i</i>        | -0.5                  | 0.1-0.3 <i>i</i>  | -0.2-0.4 <i>i</i> | -0.2+0.5 <i>i</i> | -0.9              |
| $\langle 2,0 $  | 0.1               | -0.4+0.7 <i>i</i>     | 0.1+0.3 <i>i</i>      | 0.3+0.4 <i>i</i>      | 0.7-0.1 <i>i</i>      | 0.4               | 0.3+0.7 <i>i</i>      | -0.1 <i>i</i>     | 0.2+0.3 <i>i</i>     | -0.2-0.1 <i>i</i> | 0.1                  | -0.1                  | 0.2-0.4 <i>i</i>  | 0.1+0.3 <i>i</i>  | 0.5               | 0.2+0.5 <i>i</i>  |
| $\langle 2,-1 $ | 0.1 <i>i</i>      | -0.1-0.3+0.5 <i>i</i> | 0.3+0.4 <i>i</i>      | 0.3+0.4 <i>i</i>      | 0.7-0.1 <i>i</i>      | 1.2-0.3 <i>i</i>  | -1.4+0.6 <i>i</i>     | 0.1-0.1 <i>i</i>  | 0.1-0.1 <i>i</i>     | 0.1-0.1 <i>i</i>  | 0.2+0.4 <i>i</i>     | 0                     | 0.2-0.6 <i>i</i>  | -0.7-0.1 <i>i</i> | -0.1+0.1 <i>i</i> | 0                 |
| $\langle 2,-2 $ | 0                 | 0                     | -0.1-0.1+0.2 <i>i</i> | 0.3+0.2 <i>i</i>      | 0.3+0.2 <i>i</i>      | 1.2-0.3 <i>i</i>  | -1.4+0.6 <i>i</i>     | 0.1-0.1 <i>i</i>  | 0.1-0.1 <i>i</i>     | 0.1-0.1 <i>i</i>  | 0.2+0.4 <i>i</i>     | 0                     | 0                 | 0.2-0.6 <i>i</i>  | -0.1+0.1 <i>i</i> | 0                 |
| $\langle 1,1 $  | 0.3+0.4 <i>i</i>  | 0.3-0.4 <i>i</i>      | -0.2-0.1-0.1 <i>i</i> | -0.1                  | 0                     | 0                 | -0.1-0.7-0.1 <i>i</i> | -0.5              | 0.2-0.4 <i>i</i>     | 0.2+0.4 <i>i</i>  | 0                    | -1.3-0.4+0.4 <i>i</i> | 0.1               | 0.1               | 0.1               | 0                 |
| $\langle 1,0 $  | 0.1 <i>i</i>      | 0.1 <i>i</i>          | 0.2-0.3 <i>i</i>      | -0.3-0.2-0.3 <i>i</i> | -0.3 <i>i</i>         | -0.1 <i>i</i>     | 0.1 <i>i</i>          | -0.2+0.6 <i>i</i> | 0.1+0.3 <i>i</i>     | 0                 | 0.1-0.3 <i>i</i>     | 0.2+0.6 <i>i</i>      | -0.4-0.4 <i>i</i> | -2.4              | 0.4-0.4 <i>i</i>  | 0                 |
| $\langle 1,-1 $ | 0.1 <i>i</i>      | 0                     | 0                     | 0.1-0.1 <i>i</i>      | -0.2-0.3-0.4 <i>i</i> | 0.3-0.4 <i>i</i>  | 0.3-0.4 <i>i</i>      | 0                 | -0.2+0.4 <i>i</i>    | 0.2+0.4 <i>i</i>  | 0.5-0.7+0.1 <i>i</i> | 0.1                   | 0.4+0.4 <i>i</i>  | -1.3              | -0.1              | -0.1              |
| $\langle 0,0 $  | 0.1               | 0                     | 0.2                   | 0                     | 0.2                   | 0                 | 0.1-0.1+0.1 <i>i</i>  | -0.2-0.5 <i>i</i> | -0.9                 | 0.2-0.5 <i>i</i>  | -0.1-0.1 <i>i</i>    | 0                     | -0.1              | 0                 | -0.1              | -2.7              |

Table S31 Analytical matrix elements of  $\hat{S}_a \vec{D}_{ab} \hat{S}_b$  for dicobalt(II) complexes expressed, in the molecular PAF, in the  $|S, M_S\rangle$  coupled spin-basis spanned by the  $S = 3, 2, 1, 0$  spin functions.

| $\hat{S}_a \vec{D}_{ab} \hat{S}_b$ | $ 3, 3\rangle$                 | $ 3, 2\rangle$                | $ 3, 1\rangle$                | $ 3, 0\rangle$                           | $ 3, -1\rangle$               | $ 3, -2\rangle$               | $ 3, -3\rangle$                | $ 2, 2\rangle$              | $ 2, 1\rangle$      | $ 2, 0\rangle$                | $ 2, -1\rangle$     | $ 2, -2\rangle$             | $ 1, 1\rangle$                           | $ 1, 0\rangle$                            | $ 1, -1\rangle$                | $ 0, 0\rangle$                |
|------------------------------------|--------------------------------|-------------------------------|-------------------------------|------------------------------------------|-------------------------------|-------------------------------|--------------------------------|-----------------------------|---------------------|-------------------------------|---------------------|-----------------------------|------------------------------------------|-------------------------------------------|--------------------------------|-------------------------------|
| $\langle 3, 3 $                    | $\frac{3D_{ab}}{2}$            | 0                             | $\frac{3\sqrt{15}E_{ab}}{10}$ | 0                                        | 0                             | 0                             | 0                              | 0                           | 0                   | 0                             | 0                   | 0                           | $-\frac{3\sqrt{10}E_{ab}}{10}$           | 0                                         | 0                              | 0                             |
| $\langle 3, 2 $                    | 0                              | 0                             | 0                             | $\frac{3\sqrt{30}E_{ab}}{10}$            | 0                             | 0                             | 0                              | 0                           | 0                   | 0                             | 0                   | 0                           | 0                                        | $-\frac{\sqrt{30}E_{ab}}{10}$             | 0                              | 0                             |
| $\langle 3, 1 $                    | $\frac{3\sqrt{15}E_{ab}}{10}$  | 0                             | $-\frac{9D_{ab}}{10}$         | 0                                        | $\frac{9E_{ab}}{5}$           | 0                             | 0                              | 0                           | 0                   | 0                             | 0                   | 0                           | $-\frac{\sqrt{6}D_{ab}}{5}$              | 0                                         | $-\frac{\sqrt{6}E_{ab}}{10}$   | 0                             |
| $\langle 3, 0 $                    | 0                              | $\frac{3\sqrt{30}E_{ab}}{10}$ | 0                             | $-\frac{3D_{ab}}{5} + \frac{9E_{ab}}{5}$ | 0                             | $\frac{3\sqrt{30}E_{ab}}{10}$ | 0                              | 0                           | 0                   | 0                             | 0                   | 0                           | $-\frac{4D_{ab}}{5} - \frac{3E_{ab}}{5}$ | $-\frac{3E_{ab}}{5}$                      | 0                              | 0                             |
| $\langle 3, -1 $                   | 0                              | 0                             | $\frac{9E_{ab}}{5}$           | 0                                        | $-\frac{9D_{ab}}{10}$         | 0                             | $\frac{3\sqrt{15}E_{ab}}{10}$  | 0                           | 0                   | 0                             | 0                   | 0                           | $-\frac{\sqrt{6}E_{ab}}{10}$             | 0                                         | $-\frac{\sqrt{6}D_{ab}}{5}$    | 0                             |
| $\langle 3, -2 $                   | 0                              | 0                             | 0                             | $\frac{3\sqrt{30}E_{ab}}{10}$            | 0                             | 0                             | 0                              | 0                           | 0                   | 0                             | 0                   | 0                           | 0                                        | $-\frac{\sqrt{30}E_{ab}}{10}$             | 0                              | 0                             |
| $\langle 3, -3 $                   | 0                              | 0                             | 0                             | 0                                        | $\frac{3\sqrt{15}E_{ab}}{10}$ | 0                             | $\frac{3D_{ab}}{2}$            | 0                           | 0                   | 0                             | 0                   | 0                           | 0                                        | 0                                         | $-\frac{3\sqrt{10}E_{ab}}{10}$ | 0                             |
| $\langle 2, 2 $                    | 0                              | 0                             | 0                             | 0                                        | 0                             | 0                             | 0                              | $D_{ab}$                    | 0                   | $\frac{\sqrt{6}E_{ab}}{2}$    | 0                   | 0                           | 0                                        | 0                                         | 0                              | 0                             |
| $\langle 2, 1 $                    | 0                              | 0                             | 0                             | 0                                        | 0                             | 0                             | 0                              | 0                           | $-\frac{D_{ab}}{2}$ | 0                             | $\frac{3E_{ab}}{2}$ | 0                           | 0                                        | 0                                         | 0                              | 0                             |
| $\langle 2, 0 $                    | 0                              | 0                             | 0                             | 0                                        | 0                             | 0                             | 0                              | $\frac{\sqrt{6}E_{ab}}{2}$  | 0                   | $-\frac{4D_{ab}}{3} - E_{ab}$ | 0                   | $\frac{\sqrt{6}E_{ab}}{2}$  | 0                                        | 0                                         | 0                              | $-\frac{2D_{ab}}{3} + E_{ab}$ |
| $\langle 2, -1 $                   | 0                              | 0                             | 0                             | 0                                        | 0                             | 0                             | 0                              | 0                           | $\frac{3E_{ab}}{2}$ | 0                             | $-\frac{D_{ab}}{2}$ | 0                           | 0                                        | 0                                         | 0                              | 0                             |
| $\langle 2, -2 $                   | 0                              | 0                             | 0                             | 0                                        | 0                             | 0                             | 0                              | 0                           | 0                   | $\frac{\sqrt{6}E_{ab}}{2}$    | 0                   | $D_{ab}$                    | 0                                        | 0                                         | 0                              | $-\frac{\sqrt{6}E_{ab}}{2}$   |
| $\langle 1, 1 $                    | $-\frac{3\sqrt{10}E_{ab}}{10}$ | 0                             | $-\frac{\sqrt{6}D_{ab}}{5}$   | 0                                        | $-\frac{\sqrt{6}E_{ab}}{10}$  | 0                             | 0                              | 0                           | 0                   | 0                             | 0                   | 0                           | $\frac{17D_{ab}}{30}$                    | 0                                         | $\frac{17E_{ab}}{10}$          | 0                             |
| $\langle 1, 0 $                    | 0                              | $-\frac{\sqrt{30}E_{ab}}{10}$ | 0                             | $-\frac{4D_{ab}}{5} - \frac{3E_{ab}}{5}$ | 0                             | $-\frac{\sqrt{30}E_{ab}}{10}$ | 0                              | 0                           | 0                   | 0                             | 0                   | 0                           | 0                                        | $-\frac{16D_{ab}}{15} + \frac{E_{ab}}{5}$ | 0                              | 0                             |
| $\langle 1, -1 $                   | 0                              | 0                             | $-\frac{\sqrt{6}E_{ab}}{10}$  | 0                                        | $-\frac{\sqrt{6}D_{ab}}{5}$   | 0                             | $-\frac{3\sqrt{10}E_{ab}}{10}$ | 0                           | 0                   | 0                             | 0                   | 0                           | $\frac{17E_{ab}}{10}$                    | 0                                         | $\frac{17D_{ab}}{30}$          | 0                             |
| $\langle 0, 0 $                    | 0                              | 0                             | 0                             | 0                                        | 0                             | 0                             | 0                              | $-\frac{\sqrt{6}E_{ab}}{2}$ | 0                   | $-\frac{2D_{ab}}{3} + E_{ab}$ | 0                   | $-\frac{\sqrt{6}E_{ab}}{2}$ | 0                                        | 0                                         | 0                              | $-\frac{D_{ab}}{3} - E_{ab}$  |

Table S32 Complex 2: Numerical matrix elements ( $\text{cm}^{-1}$ ) of  $\hat{H}^{\text{MS}} = J\hat{S}_a\hat{S}_b + [\hat{S}_a\hat{D}_a\hat{S}_a + \hat{S}_b\hat{D}_b\hat{S}_b]_{\text{calc}} + \hat{S}_a\hat{D}_{ab}\hat{S}_b$ , expressed in the  $|S, M_S\rangle$  coupled-spin basis, obtained with calculated local anisotropies and  $J, D_{ab}, E_{ab}$  listed in Equation ?? and Table ??, respectively, of the main manuscript.

| $\hat{H}^{\text{MS}}$ | $ 3,3\rangle$ | $ 3,2\rangle$   | $ 3,1\rangle$         | $ 3,0\rangle$        | $ 3,-1\rangle$ | $ 3,-2\rangle$ | $ 3,-3\rangle$ | $ 2,2\rangle$         | $ 2,1\rangle$          | $ 2,0\rangle$          | $ 2,-1\rangle$ | $ 2,-2\rangle$ | $ 1,1\rangle$   | $ 1,0\rangle$          | $ 1,-1\rangle$ | $ 0,0\rangle$ |
|-----------------------|---------------|-----------------|-----------------------|----------------------|----------------|----------------|----------------|-----------------------|------------------------|------------------------|----------------|----------------|-----------------|------------------------|----------------|---------------|
| $\langle 3,3 $        | 157.1         | 0.6+0.4i        | 14.7-0.8i             | 0                    | 0              | 0              | 0              | 39.4+35.3i            | 40.2+16.5i             | 0                      | 0              | 0              | 18.3-0.9i       | 0                      | 0              | 0             |
| $\langle 3,2 $        | 0.6-0.4i      | -5.1            | 0.4+0.3i              | 20.8-1.1i            | 0              | 0              | 0              | -4.6                  | 0                      | 40.2+16.5i             | 0              | 0              | -0.4-0.2i       | 10.6-0.5i              | 0              | 0             |
| $\langle 3,1 $        | 14.7+0.8i     | 0.4-0.3i        | -102.4                | 0.2+0.1i             | 22.8-1.2i      | 0              | 0              | -30.5+27.4i           | -2.9-24.9-22.3i        | 31.2+12.7i             | 0              | 0              | 79.6            | -0.3-0.2i              | 4.7-0.2i       | 0             |
| $\langle 3,0 $        | 0             | 20.8+1.1i       | 0.2-0.1i              | -135.2               | -0.2-0.1i      | 20.8-1.1i      | 0              | -18.0+7.4i-35.2+31.6i | 0                      | -35.2-31.6i            | 18.0+7.4i      | 0.2-0.1i       | 97.5            | -0.2-0.1i              | 0              | 0             |
| $\langle 3,-1 $       | 0             | 0               | 22.8+1.2i             | -0.2+0.1i            | -102.4         | -0.4-0.3i      | 14.7-0.8i      | 0                     | -31.2+12.7i-24.9+22.3i | 2.9-30.5-27.4i         | 4.7+0.2i       | 0.3-0.2i       | 79.6            | 0                      | 0              | 0             |
| $\langle 3,-2 $       | 0             | 0               | 0                     | 20.8+1.1i            | -0.4+0.3i      | -5.1           | -0.6-0.4i      | 0                     | 0                      | -40.2+16.5i            | 0              | 4.6            | 0               | 10.6+0.5i              | 0.4-0.2i       | 0             |
| $\langle 3,-3 $       | 0             | 0               | 0                     | 0                    | 14.7+0.8i      | -0.6+0.4i      | 157.1          | 0                     | 0                      | 0                      | -40.2+16.5i    | 39.4-35.3i     | 0               | 0                      | 18.3+0.9i      | 0             |
| $\langle 2,2 $        | 39.4-35.3i    | -4.6-30.5-27.4i | -18.0-7.4i            | 0                    | 0              | 0              | 0              | 1.6                   | 0                      | -0.2                   | 0              | 0              | 24.9+22.3i      | 36.0+14.7i             | 0              | 23.6-1.2i     |
| $\langle 2,1 $        | 40.2-16.5i    | 0               | -2.9-35.2-31.6i       | -31.2-12.7i          | 0              | 0              | 0              | 0                     | 1.7                    | 0                      | -0.2           | 0              | -3.6-17.6-15.8i | 25.5+10.4i-0.6-0.4i    | 0              | 162.2         |
| $\langle 2,0 $        | 0             | 0               | 0                     | 0                    | 0              | 0              | 0              | -0.2                  | 0                      | 1.9                    | 0              | 0              | -0.2-30.5+27.4i | 0                      | 0              | 3.6           |
| $\langle 2,-1 $       | 0             | 0               | 31.2-12.7i-35.2+31.6i | 2.9                  | 0              | -40.2-16.5i    | 0              | -0.2                  | 0                      | 0                      | 1.7            | 0              | 0               | -25.5+10.4i-17.6+15.8i | 3.6            | 0.6-0.4i      |
| $\langle 2,-2 $       | 0             | 0               | 0                     | 18.0-7.4i-30.5+27.4i | 4.6            | 39.4+35.3i     | 0              | 0                     | 0                      | -0.2                   | 0              | 1.6            | 0               | 0                      | -36.0+14.7i    | 24.9-22.3i    |
| $\langle 1,1 $        | 18.3+0.9i     | -0.4+0.2i       | 79.6                  | 0.2+0.1i             | 4.7-0.2i       | 0              | 0              | 24.9-22.3i            | -3.6-30.5-27.4i        | -25.5-10.4i            | 0              | 0              | -58.7           | -0.4-0.3i              | -23.2+1.2i     | 0             |
| $\langle 1,0 $        | 0             | 10.6+0.5i       | -0.3+0.2i             | 97.5                 | 0.3+0.2i       | 10.6-0.5i      | 0              | 36.0-14.7i-17.6+15.8i | 0                      | -17.6-15.8i-36.0-14.7i | -0.4+0.3i      | 136.2          | 0.4+0.3i        | 0                      | 0              | 0             |
| $\langle 1,-1 $       | 0             | 0               | 4.7+0.2i              | -0.2+0.1i            | 79.6           | 0.4+0.2i       | 18.3-0.9i      | 0                     | 25.5-10.4i-30.5+27.4i  | 3.6                    | 24.9+22.3i     | -23.2-1.2i     | 0.4-0.3i        | -58.7                  | 0              | 0             |
| $\langle 0,0 $        | 0             | 0               | 0                     | 0                    | 0              | 0              | 0              | 23.6+1.2i             | -0.6+0.4i              | 162.2                  | 0.6+0.4i       | 23.6-1.2i      | 0               | 0                      | 0              | 8.7           |

Table S33 Complex 2: Matrix elements of  $\hat{H}^{\text{MS}} - \hat{H}^{\text{eff}}$  ( $\text{cm}^{-1}$ ) expressed in the  $|S, M_S\rangle$  coupled-spin basis.  $\hat{H}^{\text{MS}}$  and  $\hat{H}^{\text{eff}}$  matrices are taken from Tables S32 and S27 respectively.

| Diff.           | $ 3,3\rangle$ | $ 3,2\rangle$ | $ 3,1\rangle$ | $ 3,0\rangle$ | $ 3,-1\rangle$ | $ 3,-2\rangle$ | $ 3,-3\rangle$ | $ 2,2\rangle$ | $ 2,1\rangle$ | $ 2,0\rangle$ | $ 2,-1\rangle$ | $ 2,-2\rangle$ | $ 1,1\rangle$ | $ 1,0\rangle$ | $ 1,-1\rangle$ | $ 0,0\rangle$ |
|-----------------|---------------|---------------|---------------|---------------|----------------|----------------|----------------|---------------|---------------|---------------|----------------|----------------|---------------|---------------|----------------|---------------|
| $\langle 3,3 $  | 0.8           | 0.4+0.6i      | 0.4-0.8i      | -0.2i         | 0              | 0              | 0              | 1.4-0.6i      | 0.3+0.7i      | -0.1          | 0.1i           | 0              | -0.2+0.4i     | 0.1i          | 0.1i           | -0.1          |
| $\langle 3,2 $  | 0.4-0.6i      | 0.2           | 0.4+0.4i      | 0.3-0.7i      | -0.1i          | 0              | 0              | 1.2-0.3i      | -0.4          | 0.4+0.7i      | 0.1            | 0              | -0.3-0.4i     | 0.1+0.1i      | 0              | 0             |
| $\langle 3,1 $  | 0.4+0.8i      | 0.4-0.4i      | -0.2          | 0.2+0.1i      | 0.2-0.6i       | 0.1i           | 0              | -0.3-0.2i     | 0.7-0.1i      | -0.1+0.3i     | 0.3+0.5i       | 0.1            | 0.3           | -0.2-0.3i     | 0.1            | -0.2          |
| $\langle 3,0 $  | 0.2i          | 0.3+0.7i      | 0.2-0.1i      | -0.7          | -0.2-0.1i      | 0.3-0.7i       | 0.2i           | -0.1+0.2i     | -0.3-0.4i     | 0.1i          | -0.3+0.4i      | 0.1+0.2i       | 0.1-0.1i      | 0.4           | -0.1-0.1i      | 0             |
| $\langle 3,-1 $ | 0             | 0.1i          | 0.2+0.6i      | -0.2+0.1i     | -0.2           | -0.4-0.4i      | 0.4-0.8i       | 0.1           | -0.3+0.5i     | -0.1-0.3i     | -0.7-0.1i      | -0.3+0.2i      | 0.1           | 0.2-0.3i      | 0.3            | 0.2           |
| $\langle 3,-2 $ | 0             | 0             | -0.1i         | 0.3+0.7i      | -0.4+0.4i      | 0.2            | -0.4-0.6i      | 0             | 0.1           | -0.4+0.7i     | -0.4           | -1.2-0.3i      | 0             | 0.1-0.1i      | 0.3-0.4i       | 0             |
| $\langle 3,-3 $ | 0             | 0             | 0             | -0.2i         | 0.4+0.8i       | -0.4+0.6i      | 0.8            | 0             | 0.1i          | -0.1          | -0.3+0.7i      | 1.4+0.6i       | -0.1i         | 0.1i          | -0.2-0.4i      | -0.1          |
| $\langle 2,2 $  | 1.4+0.6i      | 1.2+0.3i      | -0.3+0.2i     | -0.1-0.2i     | 0.1            | 0              | 0              | -0.3          | -0.1          | -0.3+0.3i     | -0.1i          | -0.1-0.1i      | 0.7-0.1i      | 0.2+0.6i      | 0              | 0.2+0.1i      |
| $\langle 2,1 $  | 0.3-0.7i      | -0.4          | 0.7+0.1i      | -0.3+0.4i     | -0.3-0.5i      | 0.1            | -0.1i          | -0.1          | -0.5          | 0.2-0.1i      | -0.3+0.3i      | 0.1i           | 0.5           | -0.1+0.3i     | 0.2+0.4i       | 0.2-0.5i      |
| $\langle 2,0 $  | -0.1          | 0.4-0.7i      | -0.1-0.3i     | -0.1i         | -0.1+0.3i      | -0.4-0.7i      | -0.1           | -0.3-0.3i     | 0.2+0.1i      | -0.4          | -0.2+0.1i      | -0.3+0.3i      | -0.2-0.4i     | 0             | -0.2+0.4i      | 0.8           |
| $\langle 2,-1 $ | -0.1i         | 0.1           | 0.3-0.5i      | -0.3-0.4i     | -0.7+0.1i      | -0.4           | -0.3-0.7i      | 0.1i          | -0.3-0.3i     | 0.2+0.1i      | -0.5           | 0.1            | -0.2+0.4i     | -0.1-0.3i     | -0.5           | -0.2-0.5i     |
| $\langle 2,-2 $ | 0             | 0             | 0.1           | 0.1-0.2i      | -0.3-0.2i      | -1.2+0.3i      | 1.4-0.6i       | -0.1+0.1i     | -0.1i         | 0.3i          | 0.1            | -0.3           | 0             | -0.2+0.6i     | 0.7+0.1i       | 0.2-0.1i      |
| $\langle 1,1 $  | -0.2-0.4i     | -0.3+0.4i     | 0.3           | 0.1+0.1i      | 0.1            | 0              | 0.1i           | 0.7+0.1i      | 0.5           | -0.2+0.4i     | -0.2-0.4i      | 0              | -0.3          | 0.4-0.4i      | -0.4           | -0.1          |
| $\langle 1,0 $  | -0.1i         | 0.1-0.1i      | -0.2+0.3i     | 0.4           | 0.2+0.3i       | 0.1+0.1i       | -0.1i          | 0.2-0.6i      | -0.1-0.3i     | 0             | -0.1+0.3i      | -0.2-0.6i      | 0.4+0.4i      | 0.9           | -0.4+0.4i      | 0             |
| $\langle 1,-1 $ | -0.1i         | 0             | 0.1           | -0.1+0.1i     | 0.3            | 0.3+0.4i       | -0.2+0.4i      | 0             | 0.2-0.4i      | -0.2-0.4i     | -0.5           | 0.7-0.1i       | -0.4          | -0.4-0.4i     | -0.3           | 0.1           |
| $\langle 0,0 $  | -0.1          | 0             | -0.2          | 0             | -0.2           | 0              | -0.1           | 0.2-0.1i      | 0.2+0.5i      | 0.8           | -0.2+0.5i      | 0.2+0.1i       | 0.1           | 0             | 0.1            | 0.7           |

## S2 xyz coordinates

### S2.1 Complex 1: $[\text{Co}_2\text{Cl}_6]^{2-}$

Arbitrary frame:

|    |           |           |           |
|----|-----------|-----------|-----------|
| Co | -0.000682 | 0.004123  | -1.595481 |
| Co | 0.000682  | -0.004123 | 1.595481  |
| Cl | 0.000000  | -1.717325 | 0.000000  |
| Cl | 1.895916  | -0.178834 | -2.743890 |
| Cl | -1.861051 | 0.153232  | -2.805935 |
| Cl | 0.000000  | 1.717325  | -0.000000 |
| Cl | -1.895916 | 0.178834  | 2.743890  |
| Cl | 1.861051  | -0.153232 | 2.805935  |

Molecular PAF:

|    |           |           |           |
|----|-----------|-----------|-----------|
| Co | -1.587716 | -0.136461 | 0.078181  |
| Co | 1.587716  | 0.136461  | -0.078181 |
| Cl | -0.048059 | -0.351600 | -1.680260 |
| Cl | -2.557145 | -2.122392 | 0.334479  |
| Cl | -2.963284 | 1.603233  | -0.094113 |
| Cl | 0.048059  | 0.351600  | 1.680260  |
| Cl | 2.557145  | 2.122392  | -0.334479 |
| Cl | 2.963284  | -1.603233 | 0.094113  |

### S2.2 Complex 2: $[\text{Co}_2(\text{L})_2(\text{acac})_2(\text{H}_2\text{O})]$

Arbitrary frame:

|    |           |           |           |
|----|-----------|-----------|-----------|
| O  | 0.113492  | -1.374674 | -0.077237 |
| Co | 0.016448  | 0.115158  | -1.554198 |
| Co | -0.018680 | -0.109455 | 1.565701  |
| O  | -0.319718 | 1.222363  | 3.089591  |
| O  | 0.000432  | 1.389143  | 0.007798  |
| O  | -2.112259 | -0.119467 | 1.251910  |
| H  | -2.566740 | -0.907787 | 1.597783  |
| H  | -2.243365 | -0.141475 | 0.253473  |
| O  | 1.975431  | 0.158534  | 1.798366  |
| O  | -2.030940 | -0.098165 | -1.451936 |
| O  | -0.237416 | 1.408603  | -3.105331 |
| O  | 0.092614  | -1.469756 | -2.913571 |
| N  | -0.059152 | -1.808842 | 2.759532  |
| N  | 2.083351  | 0.416352  | -1.629002 |
| C  | 0.564069  | 1.931802  | 3.678787  |
| C  | -0.770256 | -3.319332 | 0.982473  |
| C  | -0.434915 | -2.952446 | 2.355083  |
| H  | -0.503954 | -3.793547 | 3.070450  |
| C  | 0.701539  | 2.498988  | 0.027175  |
| C  | 1.966996  | 2.602957  | -0.618920 |
| C  | 0.220071  | 3.632736  | 0.700156  |
| C  | -0.449995 | -2.550761 | -0.158652 |
| C  | -0.735973 | -3.153432 | -1.414724 |
| C  | -1.375494 | -4.565359 | 0.853066  |
| H  | -1.588155 | -5.130032 | 1.772610  |
| C  | -2.860978 | 0.246368  | -2.355766 |
| C  | 2.551072  | 1.010673  | 2.523319  |
| C  | 1.923858  | 1.844741  | 3.440702  |
| H  | 2.571187  | 2.521007  | 4.010060  |
| C  | -1.099940 | 3.609857  | 1.317907  |

|   |           |           |           |
|---|-----------|-----------|-----------|
| H | -1.663625 | 2.652511  | 1.197804  |
| C | -1.708827 | -5.126159 | -0.377668 |
| C | -2.546186 | 0.999344  | -3.445803 |
| C | 2.595889  | 1.523487  | -1.299456 |
| H | 3.663564  | 1.712413  | -1.547700 |
| C | -1.344872 | -4.411890 | -1.486602 |
| H | -1.533774 | -4.828295 | -2.487513 |
| C | -0.376233 | -2.582105 | -2.676728 |
| H | -0.562981 | -3.254792 | -3.552925 |
| H | -1.449124 | -2.652236 | 5.980214  |
| C | -0.539125 | -3.258345 | 5.878647  |
| C | 0.318757  | -1.638219 | 4.180843  |
| H | -0.416620 | -0.936334 | 4.617335  |
| H | 1.277453  | -1.085958 | 4.164811  |
| C | -0.423979 | -4.417566 | 6.623957  |
| C | 0.050577  | 2.904875  | 4.691326  |
| H | -0.581399 | 3.661968  | 4.189807  |
| H | 0.856567  | 3.420210  | 5.238207  |
| H | -0.602258 | 2.383176  | 5.414714  |
| C | 0.448015  | -2.875103 | 5.013415  |
| C | 3.682513  | -1.741578 | -0.110669 |
| H | 2.622296  | -1.899261 | 0.113777  |
| C | -4.277203 | -0.224867 | -2.160618 |
| H | -4.296355 | -1.327852 | -2.081622 |
| H | -4.949842 | 0.085316  | -2.976063 |
| H | -4.676485 | 0.171190  | -1.207669 |
| C | 4.045327  | 1.105327  | 2.340558  |
| H | 4.532029  | 0.213702  | 2.772093  |
| H | 4.474943  | 2.004226  | 2.812365  |
| H | 4.283448  | 1.109595  | 1.262796  |
| C | -2.371102 | -6.465188 | -0.459840 |
| H | -1.812382 | -7.232655 | 0.107574  |
| H | -2.452770 | -6.816577 | -1.502735 |
| H | -3.394815 | -6.441024 | -0.039746 |
| C | 1.565054  | -3.674520 | 4.932264  |
| H | 2.384000  | -3.391249 | 4.262072  |
| C | 3.016039  | -0.576199 | -2.242488 |
| H | 3.506234  | -0.118504 | -3.124101 |
| H | 2.401409  | -1.411023 | -2.617514 |
| C | 4.049676  | -1.063389 | -1.274319 |
| C | 4.655030  | -2.200927 | 0.768833  |
| C | 0.692801  | -5.209407 | 6.516260  |
| H | 0.761142  | -6.132143 | 7.106360  |
| F | -1.726798 | -6.112369 | 7.557215  |
| C | -1.502240 | -4.816766 | 7.563022  |
| F | -2.660718 | -4.242148 | 7.305607  |
| F | -1.239495 | -4.511708 | 8.808129  |
| C | 4.279066  | -2.887951 | 2.004205  |
| F | 3.056259  | -3.437514 | 1.948283  |
| F | 4.244695  | -2.079687 | 3.052563  |
| F | 5.088540  | -3.868775 | 2.352848  |
| C | 1.682326  | -4.836019 | 5.697083  |
| H | 2.592398  | -5.442117 | 5.601930  |
| C | 5.401009  | -0.853778 | -1.529788 |
| H | 5.703744  | -0.326985 | -2.444567 |
| C | 6.001439  | -1.977793 | 0.491513  |

|   |           |           |           |
|---|-----------|-----------|-----------|
| H | 6.773111  | -2.346500 | 1.177712  |
| C | 6.342486  | -1.293225 | -0.645868 |
| H | 7.405444  | -1.116734 | -0.859792 |
| O | -1.596394 | 4.553136  | 1.898839  |
| C | 2.673551  | 3.798467  | -0.529406 |
| H | 3.658107  | 3.843182  | -1.020668 |
| C | -1.296880 | 1.537853  | -3.760791 |
| C | 0.983257  | 4.809942  | 0.748140  |
| H | 0.541497  | 5.657760  | 1.291951  |
| H | -3.357897 | 1.220261  | -4.147388 |
| C | 2.211621  | 4.914082  | 0.137340  |
| C | 3.008678  | 6.200682  | 0.185976  |
| H | 3.094622  | 6.583589  | 1.219155  |
| H | 2.525519  | 6.995864  | -0.413030 |
| H | 4.030009  | 6.062093  | -0.209204 |
| C | -1.164294 | 2.360590  | -5.013161 |
| H | -0.769726 | 3.360285  | -4.755399 |
| H | -2.110876 | 2.482281  | -5.564556 |
| H | -0.419100 | 1.889569  | -5.680001 |

Molecular PAF:

|    |           |           |           |
|----|-----------|-----------|-----------|
| O  | -0.195445 | 0.946496  | -0.987178 |
| Co | 1.328819  | 0.688948  | 0.434342  |
| Co | -1.338206 | -0.697582 | -0.431663 |
| O  | -2.451548 | -2.243338 | 0.315139  |
| O  | 0.313972  | -0.979562 | 0.933627  |
| O  | -2.133707 | 0.526377  | 1.101550  |
| H  | -2.832311 | 1.136828  | 0.806708  |
| H  | -1.373539 | 1.108085  | 1.415093  |
| O  | -0.465787 | -2.011719 | -1.702237 |
| O  | 0.163317  | 1.823982  | 1.699673  |
| O  | 2.790580  | 0.685822  | 1.850925  |
| O  | 2.133582  | 2.443892  | -0.364518 |
| N  | -2.744314 | -0.081519 | -1.830989 |
| N  | 2.501547  | -0.531414 | -0.791965 |
| C  | -2.333421 | -3.483884 | 0.034736  |
| C  | -1.971153 | 2.228824  | -1.929614 |
| C  | -2.860477 | 1.114221  | -2.242473 |
| H  | -3.684750 | 1.381620  | -2.930252 |
| C  | 0.906817  | -2.123501 | 1.185861  |
| C  | 2.106065  | -2.513634 | 0.523118  |
| C  | 0.365383  | -3.012813 | 2.127175  |
| C  | -0.682595 | 2.098343  | -1.365674 |
| C  | 0.080207  | 3.295176  | -1.273820 |
| C  | -2.455499 | 3.474945  | -2.314625 |
| H  | -3.458374 | 3.518720  | -2.764031 |
| C  | 0.577196  | 2.454761  | 2.726999  |
| C  | -0.582990 | -3.264445 | -1.702965 |
| C  | -1.470399 | -3.991909 | -0.919410 |
| H  | -1.462497 | -5.079529 | -1.051927 |
| C  | -0.819049 | -2.637812 | 2.889450  |
| H  | -1.223661 | -1.620092 | 2.667612  |
| C  | -1.727990 | 4.653663  | -2.167418 |
| C  | 1.816869  | 2.312421  | 3.272156  |
| C  | 2.740553  | -1.733283 | -0.483047 |
| H  | 3.528532  | -2.282141 | -1.044378 |

|   |           |           |           |
|---|-----------|-----------|-----------|
| C | -0.456745 | 4.523076  | -1.678274 |
| H | 0.185450  | 5.412222  | -1.589365 |
| C | 1.443818  | 3.343732  | -0.841745 |
| H | 1.924183  | 4.349305  | -0.956536 |
| H | -6.320278 | -0.398151 | -2.189255 |
| C | -5.917117 | -0.382362 | -3.210526 |
| C | -3.697991 | -1.104240 | -2.317397 |
| H | -4.269973 | -1.443366 | -1.433215 |
| H | -3.074473 | -1.969321 | -2.612706 |
| C | -6.746892 | 0.000185  | -4.248635 |
| C | -3.210732 | -4.414167 | 0.809771  |
| H | -2.936942 | -4.374771 | 1.881029  |
| H | -3.141305 | -5.457847 | 0.463101  |
| H | -4.262083 | -4.079531 | 0.743937  |
| C | -4.611215 | -0.717992 | -3.438379 |
| C | 1.545371  | -0.585860 | -3.724895 |
| H | 0.788164  | -0.050801 | -3.142100 |
| C | -0.407209 | 3.404881  | 3.354738  |
| H | -0.736903 | 4.149528  | 2.606415  |
| H | 0.004439  | 3.935849  | 4.227794  |
| H | -1.310407 | 2.851791  | 3.675242  |
| C | 0.343587  | -3.995838 | -2.641943 |
| H | 0.023881  | -3.832187 | -3.685544 |
| H | 0.374380  | -5.080734 | -2.448961 |
| H | 1.361820  | -3.579777 | -2.550378 |
| C | -2.301830 | 5.970314  | -2.586343 |
| H | -2.669770 | 5.942295  | -3.628920 |
| H | -1.555681 | 6.780541  | -2.518757 |
| H | -3.161620 | 6.261248  | -1.952964 |
| C | -4.165339 | -0.681495 | -4.739645 |
| H | -3.129581 | -0.959433 | -4.963315 |
| C | 3.253258  | 0.000545  | -1.968137 |
| H | 4.339673  | -0.127597 | -1.794070 |
| H | 3.063475  | 1.085653  | -2.011370 |
| C | 2.855469  | -0.665341 | -3.249335 |
| C | 1.197038  | -1.195963 | -4.923541 |
| C | -6.277299 | 0.044784  | -5.538326 |
| H | -6.946905 | 0.362677  | -6.347586 |
| F | -8.570788 | 1.382523  | -4.699427 |
| C | -8.163839 | 0.356182  | -3.985239 |
| F | -8.400528 | 0.668024  | -2.726170 |
| F | -8.997824 | -0.614419 | -4.258713 |
| C | -0.179243 | -1.141732 | -5.415886 |
| F | -0.875254 | -0.108821 | -4.916820 |
| F | -0.883058 | -2.216764 | -5.095767 |
| F | -0.287932 | -1.037340 | -6.725888 |
| C | -5.010811 | -0.308192 | -5.785400 |
| H | -4.612951 | -0.295659 | -6.808234 |
| C | 3.797098  | -1.368702 | -3.993593 |
| H | 4.832640  | -1.433861 | -3.633890 |
| C | 2.157498  | -1.895386 | -5.650065 |
| H | 1.889844  | -2.370683 | -6.601246 |
| C | 3.434042  | -1.979278 | -5.158151 |
| H | 4.188204  | -2.534199 | -5.732688 |
| O | -1.335302 | -3.339707 | 3.734761  |
| C | 2.663008  | -3.755599 | 0.812625  |



|   |          |           |          |
|---|----------|-----------|----------|
| H | 3.578208 | -4.039446 | 0.269921 |
| C | 2.832489 | 1.459560  | 2.834983 |
| C | 0.981206 | -4.249800 | 2.374549 |
| H | 0.501399 | -4.893766 | 3.126061 |
| H | 2.043097 | 2.919466  | 4.155456 |
| C | 2.132426 | -4.638948 | 1.729525 |
| C | 2.789984 | -5.970223 | 2.026724 |
| H | 2.061345 | -6.799882 | 1.979678 |
| H | 3.228673 | -5.984099 | 3.042561 |
| H | 3.601453 | -6.192078 | 1.312028 |
| C | 4.131630 | 1.441748  | 3.593153 |
| H | 4.346216 | 0.410981  | 3.929289 |
| H | 4.142009 | 2.111548  | 4.468437 |
| H | 4.953560 | 1.729122  | 2.912199 |
